# Supplementary material
Source: PubMed Central journal article supplement (PMC3787522)

# Enantioselective Synthesis of Quaternary Carbon Stereogenic Centers through Cu-Catalyzed Conjugate Additions of Aryl – and Alkylaluminum Reagents to Acyclic Trisubstituted Enones

Jennifer A. Dabrowski, Matthew T. Villaume, and Amir H. Hoveyda\*

*Department of Chemistry, Merkert Chemistry Center, Boston College, Chestnut Hill, Massachusetts 02467*

## SUPPORTING INFORMATION

### Table of Contents

|                                                                                      |         |
|--------------------------------------------------------------------------------------|---------|
| General .....                                                                        | S2      |
| Solvents, Reagents and Catalysts .....                                               | S2–S7   |
| Representative Experimental Procedure for Preparing Aluminum Reagents .....          | S8      |
| Representative Experimental Procedure for the Cu-catalyzed Aryl ECA Reactions .....  | S8      |
| Catalyst and Cu Screen for Aryl Additions.....                                       | S9      |
| Analytical Data of Alkyl Products .....                                              | S9–S16  |
| Representative Experimental Procedure for the Cu-catalyzed Alkyl ECA Reactions ..... | S16     |
| Catalyst and Cu Screen for Alkyl Additions.....                                      | S17     |
| Analytical Data of Aryl Products .....                                               | S17–S25 |
| Proof of Absolute Stereochemistry .....                                              | S25–26  |
| <sup>1</sup> H NMR Spectra of New Compounds .....                                    | S27–65  |

**General.** Infrared (IR) spectra were recorded on a Bruker FT-IR Alpha (ATR mode) spectrophotometer,  $\nu_{\max}$  in  $\text{cm}^{-1}$ . Bands are characterized as broad (br), strong (s), medium (m), and weak (w).  $^1\text{H}$  NMR spectra were recorded on a Varian Unity INOVA 400 (400 MHz) spectrometer. Chemical shifts are reported in ppm from tetramethylsilane with the solvent resonance as the internal standard ( $\text{CHCl}_3$ :  $\delta$  7.26 ppm). Data are reported as follows: chemical shift, integration, multiplicity (s = singlet, d = doublet, t = triplet, q = quartet, sep = septet, bs = broad singlet, m = multiplet), and coupling constants (Hz).  $^{13}\text{C}$  NMR spectra were recorded on a Varian Unity INOVA 400 (100 MHz) spectrometer with complete proton decoupling. Chemical shifts are reported in ppm from tetramethylsilane with the solvent resonance as the internal standard ( $\text{CDCl}_3$ :  $\delta$  77.16 ppm). High-resolution mass spectrometry was performed on a Micromass LCT ESI-MS or JEOL AccuTOF-DART (positive mode) at the Mass Spectrometry Facility at Boston College. Enantiomer ratios were determined by HPLC analysis (Chiral Technologies Chiralcel OD-H (4.6 x 250 mm), OJ-H (4.6 x 250 mm), or GC analysis (Chiraldex B-DM 30 m x 0.25 mm), Chiraldex GTA 30 m x 0.25 mm, Betadex 30 m x 0.25 mm), in comparison with authentic racemic materials. Melting points were measured on a Thomas Hoover capillary melting point apparatus and are uncorrected. Specific rotations were measured on a Rudolph Research Analytical Autopol IV Polarimeter.

Unless otherwise noted, all reactions were carried out with distilled and degassed solvents under an atmosphere of dry  $\text{N}_2$  in oven- (135 °C) and flame-dried glassware with standard dry box or vacuum-line techniques. Solvents were purified under a positive pressure of dry argon by a modified Innovative Technologies purification system: toluene, benzene and hexanes were purified through a copper oxide and alumina column;  $\text{CH}_2\text{Cl}_2$  and  $\text{Et}_2\text{O}$  were purged with Ar and purified by passage through two alumina columns. Tetrahydrofuran (Aldrich) was purified by distillation from sodium benzophenone ketyl immediately prior to use unless otherwise specified. All work-up and purification procedures were carried out with reagent grade solvents (purchased from Fisher) in air.

#### ■ Solvents, Reagents & Catalysts:

**Acetic acid** was purchased from Fisher and used as received.

**Racemic-2,2'-bis(diphenylphosphino)-1,1'-binaphthyl** (*rac*-binap) was purchased from Strem and used as received.

**4-Bromoanisole** was purchased from Aldrich and distilled from  $\text{CaH}_2$  prior to use.

**Bromobenzene** was purchased from Aldrich and distilled from  $\text{CaH}_2$  prior to use.

**4-Bromobenzotrifluoride** was purchased from Aldrich and distilled from  $\text{CaH}_2$  prior to use.

**3-Bromofuran** was purchased from Aldrich and distilled from  $\text{CaH}_2$  prior to use.

**1-Bromo-2-isopropylbenzene** was purchased from Alfa Aesar and distilled from  $\text{CaH}_2$  prior to use.

**3-Bromothiophene** was purchased from Aldrich and distilled from  $\text{CaH}_2$  prior to use.

**2-Bromotoluene** was purchased from Aldrich and distilled from  $\text{CaH}_2$  prior to use.

***n*-Butyllithium** was purchased from Strem (15% in hexanes) and titrated before use.

**Copper (II) trifluoromethanesulfonate** (99%) was purchased from Aldrich and used as received.

**Dimethylaluminum chloride** (neat) was purchased from Aldrich and used as received.

**Furan** was purchased from Aldrich and distilled from Na(0) prior to use.

**Isobutyl-2-bromobenzenesulfonate** was prepared as previously reported.<sup>2</sup>

***N*-Methyl-*N*-methyldieneiminium iodide (Eschenmoser's salt)** was purchased from Aldrich and used as received.

**Ozone** was generated by passing O<sub>2</sub> (Airgas) through a Pacific Instrument ozonolysis machine.

**Palladium II acetate** was purchased from Strem and used as received.

**Silver oxide** was freshly prepared as previously reported.<sup>1</sup>

**Sodium *tert*-butoxide** (98%) was purchased from Strem and used as received.

**Sodium hypochlorite** (10–15%) was purchased from Aldrich and used as received.

**2,2,6,6-Tetramethylpiperidine** was purchased from Aldrich and distilled over CaH<sub>2</sub> prior to use.

**Thiophene** was purchased from Aldrich and distilled from Na(0) prior to use.

**Triethylaluminum** (neat) was purchased from Strem and used as received.

**Trimethylaluminum** (neat) was purchased from Strem and used as received. We have found that old bottles (>1 year) of Me<sub>3</sub>Al were not as effective for the ECA reactions (conversions suffered, enantioselectivities remained the same).

**Trimethylsilyl trifluoromethanesulfonate** was purchased from Aldrich and distilled prior to use.

**NHC–Ag complexes III,<sup>1</sup> IIa and IIb,<sup>2</sup> Ib<sup>3</sup>** were prepared according to published procedures.

**NHC–Ag complexes IVa-c, Va-b** were prepared according to the procedure below from NHCs prepared previously.<sup>4</sup>

#### ■ Experimental Procedures for the Synthesis of Enone Substrates:

Enones **2b**, **2h**, **2i** were synthesized according to literature procedure.<sup>5</sup>

[1] J. J. Van Veldhuizen, J. E. Campbell, R. E. Giudici, A. H. Hoveyda, *J. Am. Chem. Soc.* **2005**, *127*, 6877–6882.

[2] a) Y. Lee, K. Akiyama, D. G. Gillingham, M. K. Brown, A. H. Hoveyda, *J. Am. Chem. Soc.* **2008**, *130*, 446–447; b) T. L. May, M. K. Brown, A. H. Hoveyda, *Angew. Chem. Int. Ed.* **2008**, *47*, 7358–7362; c) K. Akiyama, F. Gao, A. H. Hoveyda, *Angew. Chem. Int. Ed.* **2010**, *49*, 419–423.

[3] a) M. K. Brown, T. L. May, C. A. Baxter, A. H. Hoveyda, *Angew. Chem. Int. Ed.* **2007**, *46*, 1097–1100; b) Y. Lee, A. H. Hoveyda, *J. Am. Chem. Soc.* **2009**, *131*, 3160–3161.

[4] K.-s. Lee, A. H. Hoveyda, *J. Am. Chem. Soc.* **2010**, *132*, 2898–2900.

[5] D. Monguchi, C. Beemelmans, D. Hashizume, Y. Hamashima, M. Sodeoka, *J. Organometallic Chem.* **2008**, *693*, 867–873.

Other enone substrates were synthesized according to a modified reported precedence<sup>6</sup> for Zr-catalyzed carboalumination: To a flame-dried round bottom flask equipped with a stir bar was added Cp<sub>2</sub>ZrCl<sub>2</sub> (643 mg, 2.20 mmol) and CH<sub>2</sub>Cl<sub>2</sub> (50 mL) under N<sub>2</sub> after which Me<sub>3</sub>Al (2.9 mL, 30 mmol, USE CAUTION, PYROPHORIC) was added by syringe. The resulting mixture was allowed to cool to -23 °C (dry ice/acetone bath) and H<sub>2</sub>O (0.27 ml, 15 mmol) was added by syringe dropwise (reaction is extremely vigorous). After allowing the mixture to stir for 10 min, phenylacetylene (1.1 ml, 10 mmol) was added by syringe. The solution was allowed to stir for an additional 10 minutes, after which, acetyl chloride (0.85 ml, 12 mmol) was added. The mixture was allowed to stir for 10 min at -23 °C and then warm to 22 °C and stir an additional 10 min. The reaction was quenched upon dropwise addition of a saturated aqueous solution of K<sub>2</sub>CO<sub>3</sub> (1 mL, reaction is vigorous, use of a vent needle is recommended) until evolution of gas ceases. The mixture was transferred to a separatory funnel, Rochelle's salt was added (20 mL) and the layers separated. The aqueous layer was washed with Et<sub>2</sub>O (2 x 20 mL). The combined organic layers were dried over MgSO<sub>4</sub> and concentrated. The product was isolated by silica gel chromatography (100% hexanes → 20:1 Hexanes/Et<sub>2</sub>O) as a light yellow solid (1.3 g, 8.0 mmol, 80%).

Characterization data for previously undisclosed substrates:

**(E)-4-(Thiophen-3-yl)pent-3-en-2-one (2a):** IR (neat): 3105 (w), 2999 (w), 2953 (w), 2917 (w), 1676 (m), 1586 (s), 1514 (w), 1420 (w), 1367 (w), 1353 (m), 1332 (w), 1260 (w), 1208 (w), 1173 (s), 1096 (w), 1015 (w), 963 (m), 918 (w), 880 (w), 850 (w), 780 (s), 699 (w), 640 (w), 580 (w), 529 (m), 505 (w), 464 (w) cm<sup>-1</sup>; <sup>1</sup>H NMR (CDCl<sub>3</sub>, 400 MHz): δ 7.52–7.51 (1H, m), 7.32–7.31 (2H, m), 6.60 (1H, s), 2.53 (3H, s), 2.28 (3H, s); <sup>13</sup>C NMR (CDCl<sub>3</sub>, 100 MHz): δ 199.2, 147.3, 143.8, 126.4, 125.4, 125.0, 122.8, 32.5, 17.8; HRMS (ESI<sup>+</sup>): Calcd for C<sub>9</sub>H<sub>11</sub>O<sub>1</sub>S<sub>1</sub> [M+H]<sup>+</sup>: 167.0531; Found: 167.0531.

**(E)-4-(Thiophen-2-yl)pent-3-en-2-one (2c):** IR (neat): 3107 (w), 3004 (w), 2954 (w), 1673 (m), 1582 (s), 1516 (w), 1424 (w), 1384 (w), 1361 (w), 1259 (w), 1220 (w), 1183 (m), 1053 (w), 1015 (w), 975 (w), 955 (w), 853 (w), 706 (w), 635 (w), 530 (w) cm<sup>-1</sup>; <sup>1</sup>H NMR (CDCl<sub>3</sub>, 400 MHz): δ 7.37–7.33 (2H, m), 7.07–7.05 (1H, m), 6.63 (1H, s), 2.57 (3H, d, *J* = 1.2 Hz), 2.28 (3H, s); <sup>13</sup>C NMR (CDCl<sub>3</sub>, 100 MHz): δ 199.1, 146.6, 146.3, 128.5, 127.8, 127.7, 121.8, 32.2, 17.4; HRMS (ESI<sup>+</sup>): Calcd for C<sub>9</sub>H<sub>11</sub>O<sub>1</sub>S<sub>1</sub> [M+H]<sup>+</sup>: 167.0531; Found: 167.0524.

**(E)-4-(4-(Trifluoromethyl)phenyl)pent-3-en-2-one (2e):** IR (neat): 1686 (m), 1606 (m), 1573 (w), 1411 (w), 1357 (w), 1325 (s), 1267 (w), 1168 (m), 1119 (m), 1083 (w), 1066 (w), 1015 (w), 963 (w), 831 (w), 665 (w), 607 (w), 552 (w) cm<sup>-1</sup>; <sup>1</sup>H NMR (CDCl<sub>3</sub>, 400 MHz): δ 7.64 (2H, d, *J* = 8.4 Hz), 7.56 (2H, d, *J* = 8.8 Hz), 6.50 (1H, d, *J* = 1.2 Hz), 2.53 (3H, d, *J* = 1.6 Hz), 2.31 (3H, s); <sup>13</sup>C NMR (CDCl<sub>3</sub>, 100 MHz): δ 198.8, 152.2, 146.3, 131.0 (q, *J*<sub>C-F</sub> = 32.2 Hz), 127.0, 125.7, 125.5, 124.1 (q, *J*<sub>C-F</sub> = 272.3 Hz), 32.3, 18.4; HRMS (ESI<sup>+</sup>): Calcd for C<sub>12</sub>H<sub>12</sub>O<sub>1</sub>F<sub>3</sub> [M+H]<sup>+</sup>: 229.0840; Found: 229.0849.

[6] P. Wipf, S. Lim, *Angew. Chem. Int. Ed. Engl.* **1993**, 32, 1068–1071.

**(E)-4-(4-Methoxyphenyl)pent-3-en-2-one (2f):** IR (neat): 2958 (w), 2838 (w), 1676 (m), 1590 (s), 1570 (m), 1511 (m), 1460 (w), 1437 (w), 1420 (w), 1377 (w), 1356 (w), 1291 (w), 1252 (m), 1178 (s), 1129 (w), 1081 (w), 1030 (w), 926 (w), 826 (m)  $\text{cm}^{-1}$ ;  $^1\text{H}$  NMR (400 MHz,  $\text{CDCl}_3$ ):  $\delta$  7.47 (2H, dd,  $J = 6.8, 2.4$  Hz), 6.90 (2H, dd,  $J = 6.8, 2.4$  Hz), 6.50 (1H, d,  $J = 1.2$  Hz), 3.84 (3H, s), 2.53 (3H, d,  $J = 1.6$ ) 2.28 (3H, s);  $^{13}\text{C}$  NMR ( $\text{CDCl}_3$ , 100 MHz):  $\delta$  198.9, 160.7, 153.5, 134.7, 128.0, 123.0, 114.1, 55.5, 32.4, 18.2; HRMS (ESI<sup>+</sup>) Calcd for  $\text{C}_{12}\text{H}_{15}\text{O}_2$  [ $\text{M}+\text{H}^+$ ]: 191.1072. Found: 191.1076.

**(E)-4-cyclohexylpent-3-en-2-one (2g):** IR (neat): 2961 (m), 2924 (s), 2880 (w), 2852 (m), 1708 (s), 1449 (m), 1417 (w), 1378 (w), 1355 (m), 1270 (w), 1183 (w), 1148 (w), 1036 (w), 1007 (w), 965 (w), 933 (w), 894 (w), 848 (w), 795 (w), 774 (w), 641 (w), 572 (w), 535 (w), 504 (w)  $\text{cm}^{-1}$ ;  $^1\text{H}$  NMR ( $\text{CDCl}_3$ , 400 MHz):  $\delta$  6.05 (1H, s), 2.17 (3H, s), 2.10 (3H, s), 1.97–1.92 (1H, m), 1.81–1.69 (5H, m), 1.34–1.14 (5H, m);  $^{13}\text{C}$  NMR ( $\text{CDCl}_3$ , 100 MHz):  $\delta$  199.5, 163.6, 122.0, 49.1, 32.1, 31.5, 26.6, 26.3, 18.0; HRMS (ESI<sup>+</sup>): Calcd for  $\text{C}_{11}\text{H}_{19}\text{O}_1$  [ $\text{M}+\text{H}^+$ ]: 167.1436; Found: 167.1436.

**(E)-4-(3-fluorophenyl)pent-3-en-2-one (2j):** IR (neat): 3069 (w), 3003 (w), 2953 (w), 1682 (s), 1603 (s), 1581 (s), 1485 (w), 1431 (w), 1378 (w), 1356 (m), 1283 (w), 1268 (w), 1196 (s), 1088 (w), 1016 (w), 964 (w), 919 (w), 876 (w), 850 (w), 784 (m), 738 (w), 690 (w), 648 (w), 524 (w)  $\text{cm}^{-1}$ ;  $^1\text{H}$  NMR ( $\text{CDCl}_3$ , 400 MHz):  $\delta$  7.35–7.31 (1H, m), 7.27–7.25 (1H, m), 7.18–7.15 (1H, m), 7.06–7.06 (1H, m), 6.50 (1H, s), 2.50 (3H, d,  $J = 1.4$  Hz), 2.30 (3H, s);  $^{13}\text{C}$  NMR ( $\text{CDCl}_3$ , 100 MHz):  $\delta$  198.8, 162.9 (d,  $J_{\text{C-F}} = 244.8$  Hz), 152.2, 144.9 (d,  $J_{\text{C-F}} = 7.5$  Hz), 130.2 (d,  $J_{\text{C-F}} = 8.2$  Hz), 125.2, 122.3 (d,  $J_{\text{C-F}} = 3.0$  Hz), 115.9 (d,  $J_{\text{C-F}} = 20.8$  Hz), 113.6 (d,  $J_{\text{C-F}} = 22.3$  Hz), 32.3, 18.3; HRMS (ESI<sup>+</sup>): Calcd for  $\text{C}_{11}\text{H}_{12}\text{O}_1\text{F}_1$  [ $\text{M}+\text{H}^+$ ]: 179.0872; Found: 179.0880.

**(E)-tert-Butyl-2-methyl-4-oxopent-2-enoate (Substrate for 6c):** IR (neat): 2979 (w), 2932 (w), 1714 (s), 1693 (s), 1620 (w), 1478 (w), 1458 (w), 1425 (w), 1392 (w), 1368 (m), 1275 (s), 1257 (s), 1190 (m), 1169 (s), 1124 (s), 1017 (w), 966 (w), 899 (w), 848 (w), 760 (w), 741 (w), 944 (w), 568 (w)  $\text{cm}^{-1}$ ;  $^1\text{H}$  NMR ( $\text{CDCl}_3$ , 400 MHz):  $\delta$  6.99 (1H, app d,  $J = 1.2$  Hz), 2.23 (3H, s), 2.17 (3H, d,  $J = 1.6$  Hz), 1.51 (9H, s);  $^{13}\text{C}$  NMR ( $\text{CDCl}_3$ , 100 MHz):  $\delta$  199.8, 166.9, 142.7, 131.8, 82.0, 32.3, 28.1, 14.5; HRMS (ESI<sup>+</sup>): Calcd for  $\text{C}_{10}\text{H}_{17}\text{O}_3$  [ $\text{M}+\text{H}^+$ ]: 185.1178; Found: 185.1173.

**(E)-4-Methyl-5-phenylpent-3-en-2-one (Substrate for 6a):** IR (neat): 3062 (w), 3028 (w), 2913 (w), 1687 (s), 1618 (s), 1495 (w), 1454 (w), 1424 (w), 1388 (w), 1359 (w), 1212 (w), 1178 (w), 1160 (w), 1077 (w), 1029 (w), 1016 (w), 965 (w), 858 (w), 792 (w), 745 (m), 701 (m), 647 (w), 598 (w), 494 (w)  $\text{cm}^{-1}$ ;  $^1\text{H}$  NMR ( $\text{CDCl}_3$ , 400 MHz):  $\delta$  7.33–7.25 (3H, m), 7.18–7.16 (2H, m), 6.07 (1H, d,  $J = 1.2$  Hz), 3.42 (2H, s), 2.18 (3H, s), 2.09 (3H, s);  $^{13}\text{C}$  NMR ( $\text{CDCl}_3$ , 100 MHz):  $\delta$  199.4, 156.9, 137.9, 129.3, 128.7, 126.8, 125.1, 47.9, 31.4, 18.7; HRMS (ESI<sup>+</sup>): Calcd for  $\text{C}_{12}\text{H}_{15}\text{O}_1$  [ $\text{M}+\text{H}^+$ ]: 175.1123; Found: 175.1124.

**(E)-4-(4-Methoxyphenyl)hex-3-en-2-one (SM for S-5d):** IR (neat): 3073 (w), 2966 (w), 2936 (w), 2874 (w), 2838 (w), 1678 (m), 1589 (m), 1511 (s), 1463 (w), 1442 (w), 1418 (w), 1356 (w), 1287 (w), 1254 (m), 1176 (s), 1102 (w), 1064 (w), 1034 (w), 971 (w), 920 (w), 828 (m), 764 (w), 718 (w), 610 (w), 589 (w), 519 (w)  $\text{cm}^{-1}$ ;  $^1\text{H}$  NMR ( $\text{CDCl}_3$ , 400 MHz):  $\delta$  7.44 (2H, dd,  $J = 6.4, 2.0$  Hz), 6.91 (2H, dd,  $J = 6.8, 2.0$  Hz), 6.39 (1H, s), 3.84 (3H, s), 3.04 (2H, q,  $J = 7.2$  Hz), 2.27

(3H, s), 1.07 (3H, t,  $J = 7.2$  Hz);  $^{13}\text{C}$  NMR ( $\text{CDCl}_3$ , 100 MHz):  $\delta$  198.4, 160.6, 160.1, 133.4, 128.3, 122.7, 114.1, 55.5, 32.5, 24.3, 13.9; HRMS (ESI $^+$ ): Calcd for  $\text{C}_{13}\text{H}_{17}\text{O}_2$   $[\text{M}+\text{H}]^+$ : 205.1229; Found: 205.1247.

### ■ Experimental Procedures for the Synthesis of NHC–Ag Complex:

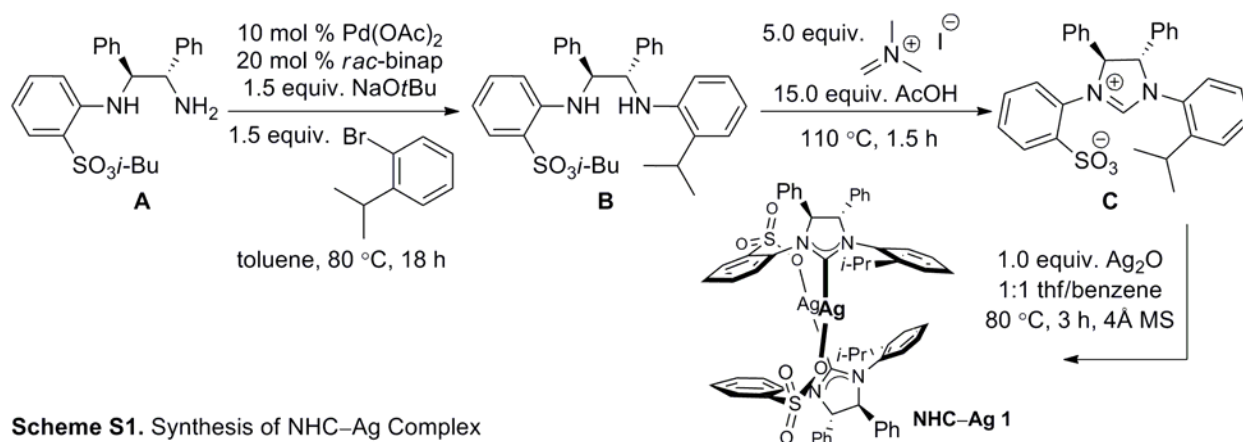

Scheme S1. Synthesis of NHC–Ag Complex

### Isobutyl-2-(((1S,2S)-2-((2-isopropylphenyl)amino)-1,2-diphenylethyl)amino)benzene-

**sulfonate (B):** To a flame-dried round bottom flask in a  $\text{N}_2$ -filled glove box were added 1-bromo-2-isopropylbenzene (810. g, 4.07 mmol),  $\text{Pd}(\text{OAc})_2$  (56.5 mg, 0.271 mmol),  $\text{NaOtBu}$  (391 mg, 4.07 mmol) and *rac*-binap (338 mg, 0.543 mmol). The flask was fitted with a reflux condenser capped with a septum and removed from the glove box. A solution of diamine **A** (1.15 g, 2.71 mmol) in toluene (20.0 mL) was added through a syringe and the resulting red solution that was allowed to stir at 80 °C (oil bath) for 18 h. The mixture was allowed to cool to 22 °C and the mixture was concentrated under reduced pressure to afford a red oil, which was dissolved in toluene, loaded on top of a column containing silica gel, and purified by silica gel chromatography (100% petroleum ether (to elute toluene)  $\rightarrow$  90% petroleum ether/ $\text{Et}_2\text{O}$ ) to afford **B** (841 mg, 1.85 mmol, 68.1%) as a yellow solid. Melting point: 54–56 °C. IR (neat): 3417 (w), 3363 (w), 3035 (w), 2959 (w), 2872 (w), 1598 (w), 1575 (w), 1502 (m), 1465 (m), 1449 (m), 1395 (w), 1353 (w), 1332 (m), 1301 (m), 1264 (w), 1242 (w), 1192 (w), 1164 (s), 1113 (w), 1103 (w), 1067 (w), 1042 (w), 977 (w), 941 (w), 911 (w), 891 (s), 846 (w), 818 (m), 776 (w), 748 (s), 739 (s), 728 (w), 701 (s), 675 (w), 613 (s), 589 (m), 577 (w), 569 (w), 550 (w), 523 (m), 510 (w), 443 (w)  $\text{cm}^{-1}$ ; (We have found that  $^1\text{H}$  NMR peaks of this compound can be concentration dependent and can shift  $\pm$  0.2 ppm.)  $^1\text{H}$  NMR ( $\text{CDCl}_3$ , 400 MHz):  $\delta$  7.72–7.70 (1H, m), 7.38–7.36 (2H, m), 7.33–7.23 (8H, m), 7.21–7.17 (1H, m), 7.12 (1H, d,  $J = 7.6$  Hz), 6.91 (1H, d,  $J = 6.0$  Hz), 6.87 (1H, dt,  $J = 7.8, 1.6$  Hz), 6.67 (2H, dt,  $J = 7.2, 0.8$  Hz), 6.41 (1H, d,  $J = 8.4$  Hz), 6.28 (1H, d,  $J = 8.4$  Hz), 4.94–4.92 (1H, m), 4.80 (1H, br s), 4.41 (1H, br s), 3.73–3.63 (2H, m), 3.01–2.95 (1H, m), 1.96–1.86 (1H, m), 1.31 (3H, d,  $J = 6.2$  Hz), 1.17 (3H, d,  $J = 6.4$  Hz), 0.91–0.85 (6H, m);  $^{13}\text{C}$  NMR ( $\text{CDCl}_3$ , 100 MHz):  $\delta$  145.5, 143.3, 139.6, 139.0, 135.2, 133.9, 130.9, 129.0, 128.7, 128.2, 127.8, 127.5, 127.2, 126.4, 125.0, 118.4, 117.4, 116.0, 113.8,

112.8, 76.4, 63.4, 62.9, 28.2, 27.4, 22.7, 22.5, 18.79, 18.76; HRMS (EI+): Calcd for  $C_{33}H_{39}N_2O_3S_1$   $[M+H]^+$ : 543.2681, Found: 543.2678; specific rotation:  $[\alpha]_D^{20}$   $-99.9$  ( $c = 0.506$ ,  $CHCl_3$ ).

**Imidazolinium Salt C:** Diamine **B** (552 mg, 1.02 mmol) and *N*-methyl-*N*-methyldieneiminium iodide (944 mg, 5.10 mmol) were weighed out into a 75 mL heavy wall sealed tube. Acetic acid (0.884 mL, 15.3 mmol) was added, the vessel sealed, and the mixture allowed to stir at 110 °C (the yellow heterogeneous mixture becomes black and homogeneous upon heating). After 1.5 h, the mixture was allowed to cool to 22 °C and diluted with  $Et_2O$  (5 mL) and water (5 mL). The resulting mixture was basified by the *slow* addition of a saturated aqueous solution of  $K_2CO_3$  until gas evolution ceased. Dichloromethane (10 mL) was added and the aqueous layer separated. The aqueous layer was washed further with  $CH_2Cl_2$  (2 x 10 mL) and the combined organic layers dried over  $Na_2SO_4$ , filtered and concentrated under reduced pressure to afford a yellow solid. The yellow solid was purified by silica gel column chromatography (100% EtOAc  $\rightarrow$  2% MeOH/EtOAc  $\rightarrow$  5% MeOH/EtOAc) to afford imidazolinium salt **C** (400. mg, 0.804 mmol, 78.7%) as a white solid. (Note: Separation of a yellow impurity by silica gel column chromatography can often be tedious. This solid can be obtained in white crystalline form by recrystallization from  $CH_2Cl_2:Et_2O$ , but such a procedure is not required for effective formation of Ag complex **1**.) IR (neat): 3063 (w), 2967 (w), 2928 (w), 1869 (w), 2242 (w), 1618 (s), 1587 (m), 1576 (m), 1497 (w), 1481 (w), 1457 (w), 1365 (w), 1273 (w), 1229 (s), 1204 (s), 1140 (w), 1088 (m), 1022 (m), 1005 (w), 909 (m), 884 (w), 759 (m), 725 (s), 701 (s), 664 (w), 646 (w), 612 (s), 564 (m), 534 (m), 484 (w), 448 (w)  $cm^{-1}$ ; (We have found that  $^1H$  NMR peaks of this compound can be concentration dependent and can shift +/- 0.2 ppm.)  $^1H$  NMR ( $CDCl_3$ , 400 MHz):  $\delta$  8.83 (1H, s), 8.26 (1H, dd,  $J = 7.6, 1.6$  Hz), 7.70–7.67 (2 H, m), 7.50–7.44 (6H, m), 7.36–7.28 (6H, m), 7.19–7.14 (1H, m), 7.11–7.07 (1H, m), 6.67 (1H, dd,  $J = 8.0, 1.2$  Hz), 6.28 (1H, d,  $J = 10.8$  Hz), 5.58 (1H, d,  $J = 10.8$  Hz), 3.33 (1H, septet,  $J = 6.4$  Hz), 1.28 (3H, d,  $J = 6.8$  Hz), 1.07 (3H, d,  $J = 6.8$  Hz);  $^{13}C$  NMR ( $CDCl_3$ , 100 MHz):  $\delta$  158.9, 153.2, 148.3, 146.2, 143.6, 135.2, 132.7, 131.4, 130.9, 130.8, 130.4, 130.4, 130.1, 130.1, 129.94, 129.90, 129.5, 128.9, 128.4, 127.5, 127.4, 78.3, 76.4, 28.4, 24.6, 24.3; HRMS (ESI+): Calcd for  $C_{30}H_{28}N_2O_3S_1Na_1$   $[M+Na]^+$ : 519.1718, Found: 519.1712; specific rotation:  $[\alpha]_D^{20}$   $+91.8$  ( $c = 0.146$ ,  $CHCl_3$ ).

**NHC–Ag complex:** Imidazolinium salt **C** (170. mg, 0.526 mmol),  $Ag_2O$  (244. mg, 1.05 mmol) and oven-dried <5 micron 4Å molecular sieves (ca. 50 mg) were weighed out into an oven-dried 10 mL round bottom flask fitted with a reflux condenser, and wrapped with aluminum foil. Tetrahydrofuran (2.0 mL) followed immediately by benzene (2.0 mL) were added through a syringe resulting in a black heterogeneous mixture, which was allowed to stir at 80 °C. After 3 h, the mixture was allowed to cool to 22 °C and filtered through a short plug of Celite 545 (4 x 1 cm) eluted with thf (ca. 20 mL). The volatiles were removed in vacuo to afford 182. mg (0.301 mmol, 57.3%) of Ag complex as a white solid, which was stored under low light conditions. The silver complex exists as a mixture of rotamers of dimer and monomer in solution. All characterization is reported on this mixture. IR (neat): 3470 (br), 3064 (w), 3033 (w), 2960 (w),

2925 (w), 2868 (w), 1626 (w), 1604 (w), 1590 (w), 1481 (m), 1456 (m), 1349 (w), 1280 (w), 1231 (m), 1204 (m), 1139 (w), 1091 (w), 1023 (w), 1104 (w), 920 (w), 898 (w), 764 (w), 724 (w), 701 (m), 665 (w), 651 (w), 614 (w), 560 (w), 543 (w)  $\text{cm}^{-1}$ ; (We have found that  $^1\text{H}$  NMR peaks of this compound can be concentration dependent and can shift  $\pm 0.2$  ppm.)  $^1\text{H}$  NMR ( $\text{CDCl}_3$ , 400 MHz):  $\delta$  8.18–8.12 (1H, m), 7.59–7.51 (2H, m), 7.42–6.99 (11H, m), 6.80–6.65 (2H, m), 6.48–6.40 (0.5H, m), 6.36–6.29 (1H, m), 6.24–6.06 (0.5H, m), 5.25–5.02 (1H, m), 4.41 (0.05 H, t,  $J = 7.2$  Hz), 3.33–3.12 (1H, m), 2.72 (2H, s), 2.57–2.53 (0.07 H, m), 2.34–2.30 (0.07 H, m), 2.17 (0.11 H, br s), 1.46–1.24 (5H, m), 1.13 (0.16 H, d,  $J = 6.8$  Hz), 0.95–0.89 (0.44 H, m), 0.73 (0.23H, br s), 0.55 (0.59H, br s), 0.30 (1H, d,  $J = 6.0$  Hz), 0.13 (0.45H, s);  $^{13}\text{C}$  NMR ( $\text{CDCl}_3$ , 100 MHz):  $\delta$  207.4, 205.3, 144.8, 143.1, 138.6, 137.5, 136.9, 136.5, 135.5, 131.3, 131.0, 130.7, 130.1, 129.8, 129.6, 128.9, 128.8, 128.7, 128.6, 128.4, 127.1, 126.9, 126.7, 125.8, 125.6, 80.1, 79.1, 76.4, 68.7, 68.1, 66.0, 64.5, 38.2, 35.4, 30.7, 29.8, 28.3, 27.9, 26.9, 25.7, 25.2, 24.5, 23.8, 22.7, 22.3, 21.7, 19.2; HRMS (EI+): Calcd for  $\text{C}_{25}\text{H}_{25}\text{N}_2\text{O}_3\text{NaSAg}$   $[\text{M}+\text{Na}]^+$ : 563.0535, Found: 563.0536; specific rotation:  $[\alpha]_{\text{D}}^{20} -44$ . ( $c = 0.25$ ,  $\text{CHCl}_3$ ).

■ **Representative Procedure for the Preparation of Arylaluminum Reagents:** To a flame-dried 10 mL round bottom flask equipped with a stir bar was added bromobenzene (0.42 mL, 4.00 mmol) and thf (2 mL). The mixture was allowed to cool to  $-78$  °C before  $n\text{BuLi}$  (2.52 mL, 4.00 mmol) was added dropwise by syringe addition and the solution was allowed to stir at  $-78$  °C for 1 h. At this point  $\text{Me}_2\text{AlCl}$  (0.37 mL, 4.0 mmol) was added dropwise by syringe and the solution was allowed to warm to  $22$  °C and stir for 12 h. Pentanes (2 mL) was added and the solution was allowed to stir for 1 h. The solution was allowed to stand for  $>1$  h before using the top pentane layer in reactions. (The lower thf layer contains LiCl salts, which are detrimental to the enantioselectivity of the reaction).

■ **Representative Procedure for Catalytic Enantioselective Addition of Arylaluminum Reagents to Acyclic Enones:** An oven-dried 1 dram vial, equipped with a stir bar was charged with chiral NHC–Ag complex **1** (3.0 mg, 5.0  $\mu\text{mol}$ ) and  $\text{Cu}(\text{OTf})_2$  (1.6 mg, 5.0  $\mu\text{mol}$ ), weighed out under a  $\text{N}_2$  atmosphere in a glove box. The vial was sealed with a septum cap and removed from the glovebox. Tetrahydrofuran (1.0 mL) was added to the vial and the resulting solution was allowed to stir for five minutes prior to cooling to  $-30$  °C. Dimethylphenylaluminum (0.581M, 200  $\mu\text{L}$ , 0.200 mmol) was added, resulting in a brown solution to which a solution of the enone substrate (*E*)-4-(thiophen-3-yl)pent-3-en-2-one (0.2M, 0.5 ml, 100  $\mu\text{mol}$ ) was added. The septum cap was exchanged for a solid cap and the vial was transferred to a cryocool ( $-30$  °C) for 1 hour. The reaction was quenched with a saturated solution of sodium potassium tartrate (1.0 mL). After the mixture was allowed to warm to  $22$  °C, the solution was diluted with  $\text{Et}_2\text{O}$  and the layers were separated. The aqueous layer was washed with  $\text{Et}_2\text{O}$  (3 x 1 mL). The combined organic layers were passed through a short plug of silica gel (4 cm x 1 cm) eluting with  $\text{Et}_2\text{O}$  (10.0 mL). The organic layer was concentrated to a yellow oil and purified by silica gel chromatography (10:1 hexanes/ $\text{Et}_2\text{O}$ ) to afford 17.1 mg of (*R*)-4-phenyl-4-(thiophen-3-yl)pentan-2-one as a clear, yellow oil (0.087 mmol, 87% yield).



## ■ Catalyst Screen for Aryl Addition:

**Table S1:** Catalyst Screen for Aryl Addition to Acyclic Enones<sup>[a]</sup>

| entry | NHC–Ag     | conv. [%] <sup>b</sup> | yield [%] <sup>c</sup> | er <sup>d</sup> |
|-------|------------|------------------------|------------------------|-----------------|
| 1     | <b>Ia</b>  | 70                     | 65                     | 89:11           |
| 2     | <b>Ib</b>  | 65                     | 55                     | 52:48           |
| 3     | <b>Ic</b>  | 5                      | nd                     | nd              |
| 4     | <b>IIa</b> | 70                     | 61                     | 85:15           |
| 5     | <b>IIb</b> | >98                    | 85                     | 97.5:2.5        |
| 6     | <b>IIc</b> | 98                     | 71                     | 99:1            |
| 7     | <b>III</b> | 90                     | 70                     | 54:46           |
| 8     | <b>IVa</b> | >98                    | 81                     | 94:6            |
| 9     | <b>IVb</b> | >98                    | 76                     | 94.5:5.5        |
| 10    | <b>IVc</b> | >98                    | 73                     | 93:7            |
| 11    | <b>Va</b>  | >98                    | 73                     | 69:31           |
| 12    | <b>Vb</b>  | >98                    | 79                     | 82:18           |

**Ia** Ar = 2,4,6MeC<sub>6</sub>H<sub>2</sub>

**IIa** Ar = 2,4,6MeC<sub>6</sub>H<sub>2</sub>

**III**

**Ib** Ar = 3,5MeC<sub>6</sub>H<sub>3</sub>

**IIb** Ar = 2,6EtC<sub>6</sub>H<sub>3</sub>

**Ic** Ar = 2,6*i*PrC<sub>6</sub>H<sub>3</sub>

**IIc** Ar = 2*i*PrC<sub>6</sub>H<sub>4</sub>

**IVa** Ar = 2,4,6MeC<sub>6</sub>H<sub>2</sub>

**IVb** Ar = 2,6EtC<sub>6</sub>H<sub>3</sub>

**IVc** Ar = 2(C<sub>6</sub>H<sub>5</sub>)C<sub>6</sub>H<sub>4</sub>

**Va** R = *i*-Pr

**Vb** R = *t*-Bu

<sup>[a]</sup> Reactions were performed under a N<sub>2</sub> atmosphere. <sup>[b]</sup> Determined by analysis of 400 MHz <sup>1</sup>H NMR of unpurified mixtures. <sup>[c]</sup> Yields of isolated products after purification (±5%). <sup>[d]</sup> Determined by GC analysis. nd = not determined.

| entry | Cu source                            | conv. [%] <sup>b</sup> | er <sup>d</sup> |
|-------|--------------------------------------|------------------------|-----------------|
| 1     | CuBr <sub>2</sub>                    | 60                     | 93:7            |
| 2     | CuCl <sub>2</sub>                    | 61                     | 92:8            |
| 3     | CuCl <sub>2</sub> •2H <sub>2</sub> O | 64                     | 93:7            |
| 4     | CuCl                                 | 83                     | 94:6            |
| 5     | CuOTf <sub>2</sub>                   | >98                    | 99:1            |

2.5 mol % **IIc**, 5 mol % **Cu Source**  
 3.0 equiv. Me<sub>2</sub>AlPh, thf, 24 h, –30 °C

## ■ Analytical Data of Aryl Addition Products:

**(S)-4-Phenyl-4-(thiophen-3-yl)pentan-2-one (S-3a):** IR (neat): 3109 (w), 3085 (w), 3057 (w), 3026 (w), 2970 (w), 2933 (w), 2887 (w), 1719 (s), 1599 (w), 1494 (w), 1445 (w), 1414 (w), 1356 (m), 1305 (w), 1272 (w), 1228 (w), 1201 (w), 1156 (w), 1085 (w), 1030 (w), 971 (w), 932 (w), 910 (w), 865 (w), 787 (m), 769 (m), 701 (s), 676 (w), 661 (w), 612 (w), 550 (w) cm<sup>-1</sup>; <sup>1</sup>H NMR (CDCl<sub>3</sub>, 400 MHz): δ 7.34–7.13 (6H, m), 6.97–6.96 (1H, m), 6.75–6.73 (1H, m), 3.15 (2H, ABq, Δδ<sub>AB</sub> = 0.05, J<sub>AB</sub> = 13.6 Hz), 1.74 (3H, s), 1.70 (3H, s); <sup>13</sup>C NMR (CDCl<sub>3</sub>, 100 MHz): δ 207.9, 150.0, 147.8, 128.4, 127.7, 126.9, 126.5, 125.8, 120.2, 54.9, 43.8, 32.0, 27.8; HRMS (ESI<sup>+</sup>): Calcd for C<sub>15</sub>H<sub>20</sub>N<sub>1</sub>O<sub>1</sub>S<sub>1</sub>[M+NH<sub>4</sub>]<sup>+</sup>: 262.1266; Found: 262.1270; specific rotation: [α]<sub>D</sub><sup>20</sup> +1.09 (c = 1.13 CHCl<sub>3</sub>) for an enantiomerically enriched sample of 99.6:0.4 er. Enantiomeric purity (99.6:0.4er) was determined by HPLC analysis in comparison with authentic racemic material; Chiralcel OD(H), 99% hexanes, 1% *i*-PrOH, 0.8 mL/min, 220 nm.

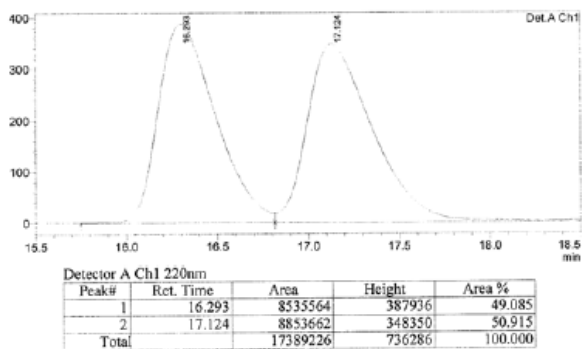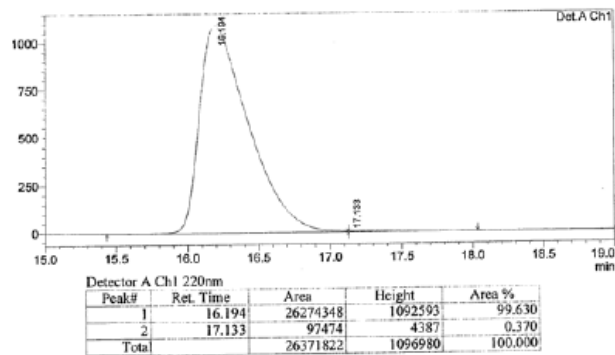

| Retention Time | Area    | Area % | Retention Time | Area     | Area % |
|----------------|---------|--------|----------------|----------|--------|
| 16.293         | 8535564 | 49.085 | 16.194         | 26274348 | 99.630 |
| 17.124         | 8853662 | 50.915 | 17.133         | 97474    | 0.370  |

**(R)-4-Phenyl-4-(thiophen-3-yl)pentan-2-one (R-3a):** IR (neat): 3109 (w), 3085 (w), 3057 (w), 3026 (w), 2970 (w), 2933 (w), 2887 (w), 1719 (s), 1599 (w), 1494 (w), 1445 (w), 1414 (w), 1356 (m), 1305 (w), 1272 (w), 1228 (w), 1201 (w), 1156 (w), 1085 (w), 1030 (w), 971 (w), 932 (w), 910 (w), 865 (w), 787 (m), 769 (m), 701 (s), 676 (w), 661 (w), 612 (w), 550 (w)  $\text{cm}^{-1}$ ;  $^1\text{H}$  NMR ( $\text{CDCl}_3$ , 400 MHz):  $\delta$  7.34–7.13 (6H, m), 6.97–6.96 (1H, m), 6.75–6.73 (1H, m), 3.15 (2H, ABq,  $\Delta\delta_{\text{AB}} = 0.05$ ,  $J_{\text{AB}} = 13.6$  Hz), 1.74 (3H, s), 1.70 (3H, s);  $^{13}\text{C}$  NMR ( $\text{CDCl}_3$ , 100 MHz):  $\delta$  207.9, 150.0, 147.8, 128.4, 127.7, 126.9, 126.5, 125.8, 120.2, 54.9, 43.8, 32.0, 27.8; HRMS (ESI $^+$ ): Calcd for  $\text{C}_{15}\text{H}_{20}\text{N}_1\text{O}_1\text{S}_1[\text{M}+\text{NH}_4]^+$ : 262.1266; Found: 262.1262; specific rotation:  $[\alpha]_{\text{D}}^{20} -4.2$  ( $c = 0.35$   $\text{CHCl}_3$ ) for an enantiomerically enriched sample of 92:8 er. Enantiomeric purity (99:1 er) was determined by HPLC analysis in comparison with authentic racemic material; Chiralcel OD(H), 99% hexanes, 1% *i*-PrOH, 0.8 mL/min, 220 nm.

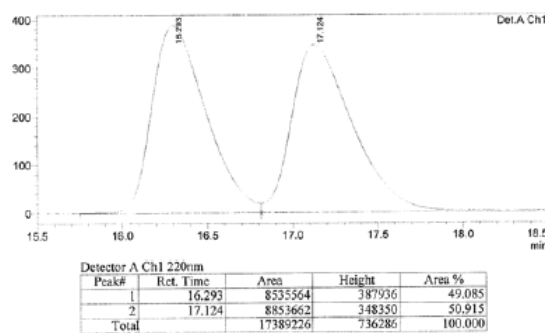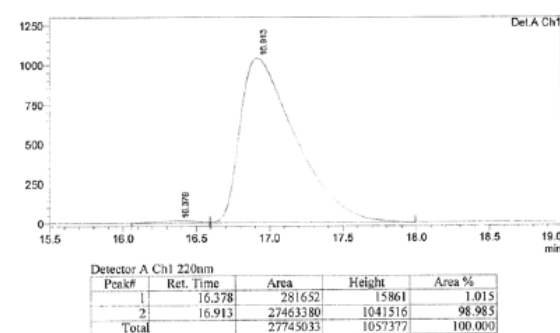

| Retention Time | Area    | Area % | Retention Time | Area     | Area % |
|----------------|---------|--------|----------------|----------|--------|
| 16.293         | 8535564 | 49.085 | 16.378         | 281652   | 1.015  |
| 17.124         | 8853662 | 50.915 | 16.913         | 27463380 | 98.985 |

**(R)-4-Phenyl-4-(thiophen-2-yl)pentan-2-one (3b):** IR (neat): 3107 (w), 3087 (w), 3060 (w), 3024 (w), 2996 (w), 1971 (w), 1932 (w), 1851 (w), 1720 (m), 1705 (m), 1582 (w), 1494 (w), 1445 (w), 1357 (m), 1308 (w), 1236 (w), 1157 (w), 1081 (w), 1054 (w), 1031 (w), 968 (w), 921 (w), 851 (w), 830 (w), 765 (w), 698 (s), 597 (w), 545 (w)  $\text{cm}^{-1}$ ;  $^1\text{H}$  NMR ( $\text{CDCl}_3$ , 400 MHz):  $\delta$  7.31–7.27 (4H, m), 7.24–7.19 (1H, m), 7.16 (1H, dd,  $J = 4.8, 1.2$  Hz), 6.92 (1H, dd,  $J = 5.2, 3.6$  Hz), 6.80 (1H, dd,  $J = 3.6, 1.2$  Hz), (2H, ABq,  $\Delta\delta_{\text{AB}} = 0.11$ ,  $J_{\text{AB}} = 14.8$  Hz), 1.90 (3H, s), 1.83

(3H, s);  $^{13}\text{C}$  NMR ( $\text{CDCl}_3$ , 100 MHz):  $\delta$  207.0, 128.4, 126.7, 126.54, 126.49, 124.01, 124.02, 55.9, 44.1, 28.9; HRMS ( $\text{ESI}^+$ ): Calcd for  $\text{C}_{15}\text{H}_{17}\text{O}_1\text{S}_1[\text{M}+\text{H}]^+$ : 245.1000; Found: 245.0992; specific rotation:  $[\alpha]_{\text{D}}^{20}$   $-4.2$  ( $c = 0.35 \text{ CHCl}_3$ ) for an enantiomerically enriched sample of 92:8 er. Enantiomeric purity (92:8 er) was determined by HPLC analysis in comparison with authentic racemic material; Chiracel AD(H), 99.8% hexanes, 0.2% *i*-PrOH, 0.8 mL/min, 220 nm.

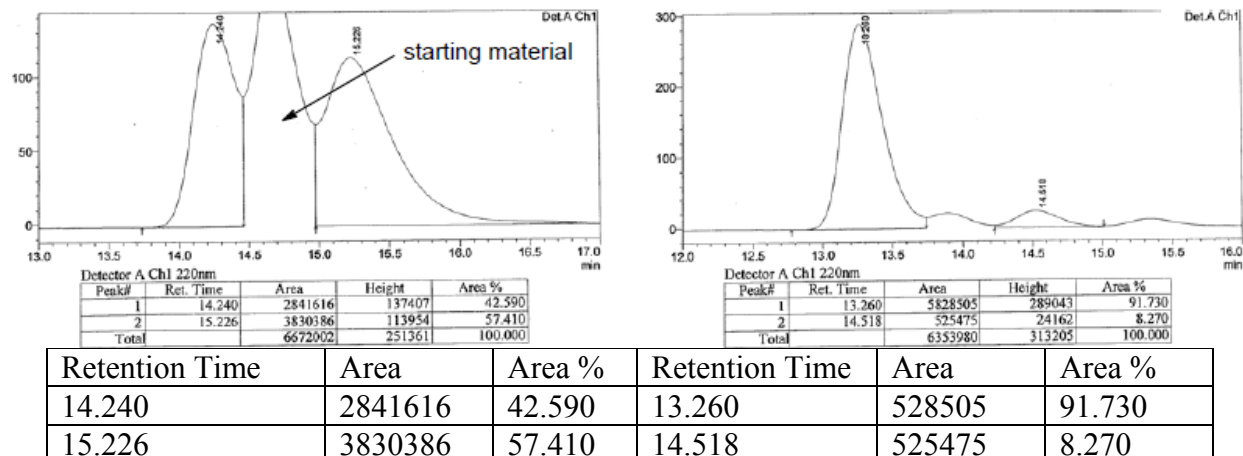

**(R)-4-(2-Fluorophenyl)-4-phenylpentan-2-one (3c):** (All data are reported on an inseparable mixture of 1:1.3 product: 1,4-Me addition) IR (neat): 3085 (w), 3061 (w), 3032 (w), 2966 (w), 2928 (w), 2883 (w), 2855 (w), 1718 (s), 1612 (w), 1602 (w), 1578 (w), 1488 (s), 1446 (m), 1421 (w), 1358 (m), 1309 (w), 1280 (w), 1210 (m), 1162 (w), 1135 (w), 1113 (w), 1085 (w), 1031 (w), 970 (w), 942 (w), 813 (w), 757 (s), 700 (m), 597 (w) 557 (w), 528 (w), 500 (w)  $\text{cm}^{-1}$ ;  $^1\text{H}$  NMR ( $\text{CDCl}_3$ , 400 MHz):  $\delta$  7.41–7.37 (1H, m), 7.33–7.13 (8H, m), 7.12–7.06 (2H, m), 7.02–6.91 (2H, m), 3.36 (2H, ABq,  $\Delta\delta_{\text{AB}} = 0.38$ ,  $J_{\text{AB}} = 14.4$  Hz), 2.95 (3H, s), 1.89 (4H, s), 1.82 (3H, s), 1.81 (3H, s), 1.46 (9H, s);  $^{13}\text{C}$  NMR ( $\text{CDCl}_3$ , 100 MHz):  $\delta$  208.0, 207.7, 161.6 (d,  $J_{\text{CF}} = 244.8$  Hz), 161.1 (d,  $J_{\text{CF}} = 247.0$  Hz), 148.6, 134.4, 134.3, 129.0, 128.8 (d,  $J_{\text{CF}} = 4.5$  Hz), 128.7 (d,  $J_{\text{CF}} = 8.2$  Hz), 128.2 (d,  $J_{\text{CF}} = 5.7$  Hz), 128.1 (d,  $J_{\text{CF}} = 8.9$  Hz), 127.8, 126.2, 125.84, 125.83, 124.2 (d,  $J_{\text{CF}} = 3.0$  Hz), 124.0 (d,  $J_{\text{CF}} = 3.0$  Hz), 116.5 (d,  $J_{\text{CF}} = 23.1$  Hz), 116.3 (d,  $J_{\text{CF}} = 24.6$  Hz), 54.3 (d,  $J_{\text{CF}} = 5.2$  Hz), 52.6 9 d,  $J_{\text{CF}} = 3.7$  Hz), 44.0 (d,  $J_{\text{CF}} = 1.5$  Hz), 36.5 (d,  $J_{\text{CF}} = 3.0$  Hz), 32.0, 31.5, 29.9, 28.6 (d,  $J_{\text{CF}} = 2.2$  Hz), 27.9; HRMS ( $\text{ESI}^+$ ): Calcd for  $\text{C}_{17}\text{H}_{18}\text{F}_1\text{O}_1[\text{M}+\text{H}]^+$ : 257.1342; Found: 257.1349. specific rotation:  $[\alpha]_{\text{D}}^{20}$   $+32$ . ( $c = 0.38 \text{ CHCl}_3$ ) for an enantiomerically enriched sample of 99.7:0.3 er. Enantiomeric purity (99.7:0.3 er) was determined by HPLC analysis in comparison with authentic racemic material; Chiracel OD(H), 99.5% hexanes, 0.5% *i*-PrOH, 0.8 mL/min, 220 nm.

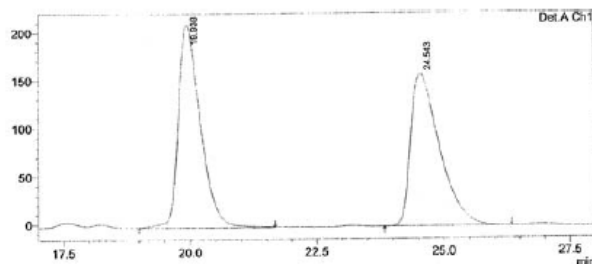

| Peak# | Ret. Time | Area     | Height | Area %  |
|-------|-----------|----------|--------|---------|
| 1     | 19.938    | 6349374  | 211132 | 50.615  |
| 2     | 24.543    | 6195072  | 159153 | 49.385  |
| Total |           | 12544446 | 370286 | 100.000 |

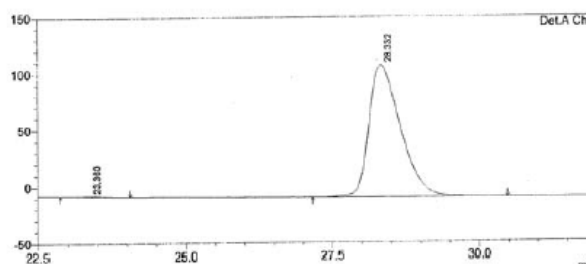

| Peak# | Ret. Time | Area    | Height | Area %  |
|-------|-----------|---------|--------|---------|
| 1     | 23.360    | 13952   | 533    | 0.318   |
| 2     | 28.332    | 4367731 | 116908 | 99.682  |
| Total |           | 4381683 | 117441 | 100.000 |

| Retention Time | Area    | Area % | Retention Time | Area    | Area % |
|----------------|---------|--------|----------------|---------|--------|
| 19.938         | 6349374 | 50.615 | 23.360         | 13952   | 0.318  |
| 24.543         | 6195072 | 49.385 | 28.332         | 4367731 | 99.682 |

**(R)-4-Phenyl-4-(4-(trifluoromethyl)phenyl)pentan-2-one (3d):** (Carbon spectra was recorded as an inseparable 92:8 mixture of product and Me addition product). IR (neat): 3060 (w), 2971 (w), 2922 (w), 2851 (w), 1720 (m), 1617 (w), 1495 (w), 1409 (w), 1358 (w), 1324 (s), 1162 (m), 1113 (s), 1071 (m), 1030 (w), 1015 (m), 840 (w), 769 (w), 746 (w), 700 (m), 611 (w), 553 (w), 539 (w)  $\text{cm}^{-1}$ ;  $^1\text{H}$  NMR ( $\text{CDCl}_3$ , 400 MHz):  $\delta$  7.54–7.52 (2H, m), 7.32–7.18 (5H, m) 7.17–7.15 (2H, m), 3.27 (2H, ABq,  $\Delta\delta_{\text{AB}} = 0.03$ ,  $J_{\text{AB}} = 14.9$  Hz), 1.83 (3H, s), 1.79 (3H, s);  $^{13}\text{C}$  NMR ( $\text{CDCl}_3$ , 100 MHz):  $\delta$  207.1, 152.9, 147.8, 129.2, 128.7, 128.5, 127.6, 127.1, 126.6, 126.4, 126.0, 125.3 (q,  $J_{\text{CF}} = 3.7$  Hz), 125.2 (q,  $J_{\text{CF}} = 3.8$  Hz), 124.3 (q,  $J_{\text{CF}} = 270.8$  Hz), 56.4, 54.3, 45.8, 32.1, 31.7, 29.1, 27.8, 22.8, 14.3; HRMS (ESI $^+$ ): Calcd for  $\text{C}_{18}\text{H}_{21}\text{F}_3\text{N}_1\text{O}_1[\text{M}+\text{NH}_4]^+$ : 324.1575; Found: 324.1577; specific rotation:  $[\alpha]_{\text{D}}^{20} -1.8$  ( $c = 0.43$   $\text{CHCl}_3$ ) for an enantiomerically enriched sample of 94:6 er. Enantiomeric purity (94:6 er) was determined by HPLC analysis in comparison with authentic racemic material; Chiracel AD(H), 99.5% hexanes, 0.5% *i*-PrOH, 0.5 ml/min, 220nm.

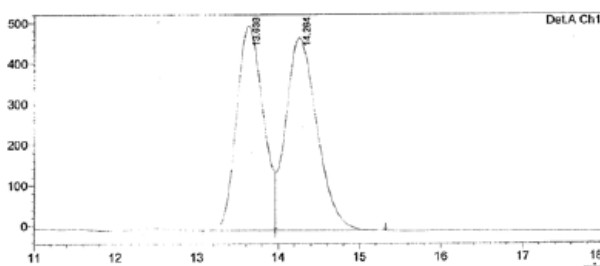

| Peak# | Ret. Time | Area     | Height | Area %  |
|-------|-----------|----------|--------|---------|
| 1     | 13.638    | 11541296 | 504195 | 47.718  |
| 2     | 14.264    | 12645070 | 475507 | 52.282  |
| Total |           | 24186367 | 979702 | 100.000 |

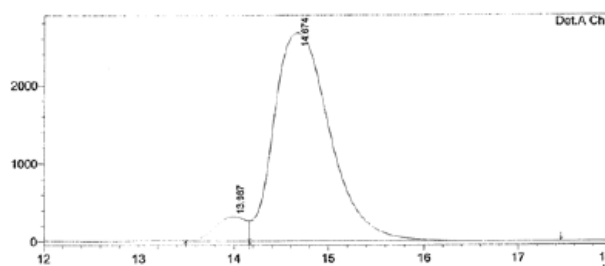

| Peak# | Ret. Time | Area      | Height  | Area %  |
|-------|-----------|-----------|---------|---------|
| 1     | 13.987    | 7332767   | 317858  | 6.268   |
| 2     | 14.674    | 109657840 | 2671173 | 93.732  |
| Total |           | 116990608 | 2989031 | 100.000 |

| Retention Time | Area     | Area % | Retention Time | Area      | Area % |
|----------------|----------|--------|----------------|-----------|--------|
| 13.638         | 11541296 | 47.718 | 13.987         | 7332767   | 6.268  |
| 14.264         | 12645070 | 52.282 | 14.674         | 109657840 | 93.732 |

**(R)-4-(4-Methoxyphenyl)-4-phenylpentan-2-one (3e):** IR (neat): 3057 (w), 2964 (w), 2935 (w), 2836 (w), 1703 (m), 1609 (w), 1581 (w), 1511 (s), 1495 (w), 1464 (w), 1444 (w), 1415 (w), 1356

(w), 1297 (s), 1250 (m), 1183 (w), 1158 (w), 1113 (w), 1076 (w), 1031 (m), 830 (m), 804 (w), 777 (w), 766 (w), 701 (m), 551 (m),  $\text{cm}^{-1}$ ;  $^1\text{H}$  NMR ( $\text{CDCl}_3$ , 400 MHz):  $\delta$  7.30–7.27 (3H, m), 7.20–7.17 (2H, m) 7.12–7.09 (2H, m), 6.83–6.81 (2H, m), 3.79 (3H, s), 3.20 (2H, ABq,  $\Delta\delta_{\text{AB}} = 0$ ,  $J_{\text{AB}} = 14.4$  Hz), 1.78 (3H, s), 1.70 (3H, s);  $^{13}\text{C}$  NMR ( $\text{CDCl}_3$ , 100 MHz):  $\delta$  208.4, 157.9, 149.1, 140.7, 128.3, 128.0, 127.1, 126.2, 113.6, 55.3, 54.8, 45.1, 32.2, 28.1; HRMS (ESI $^+$ ): Calcd for  $\text{C}_{18}\text{H}_{20}\text{O}_2[\text{M}+\text{H}]^+$ : 268.1463; Found: 268.1472; specific rotation:  $[\alpha]_{\text{D}}^{20} +13$ . ( $c = 0.29$   $\text{CHCl}_3$ ) for an enantiomerically enriched sample of 98:2 er. Enantiomeric purity (98:2 er) was determined by HPLC analysis in comparison with authentic racemic material; Chiracel AD(H), 99.5% hexanes, 0.5% *i*-PrOH, 0.5 ml/min, 220nm.

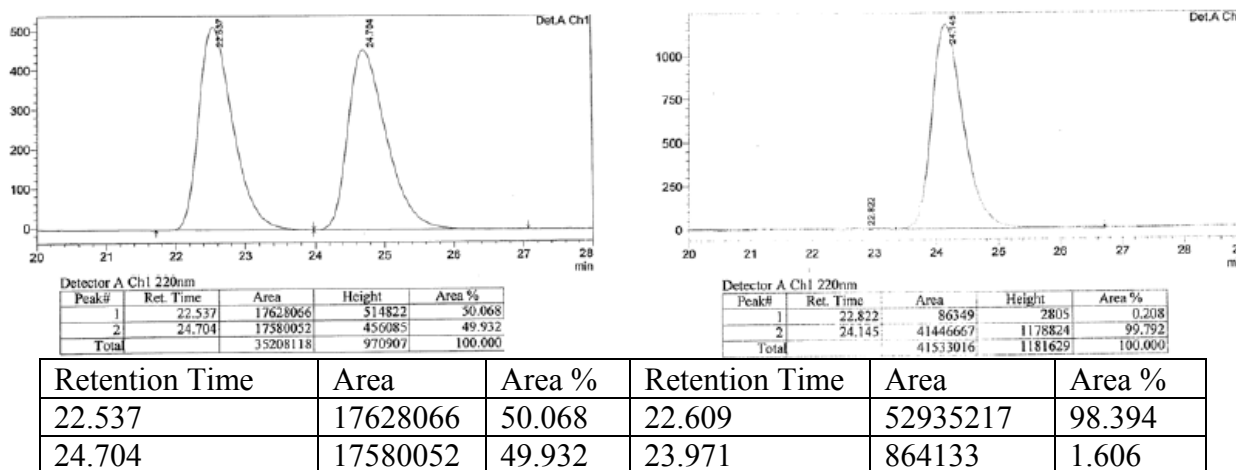

**(S)-4-Phenyl-4-(4-(trifluoromethyl)phenyl)pentan-2-one (3f)**: (Carbon spectra was recorded as an inseparable 92:8 mixture of product and Me addition product). IR (neat): 3060 (w), 2971 (w), 2922 (w), 2851 (w), 1720 (m), 1617 (w), 1495 (w), 1409 (w), 1358 (w), 1324 (s), 1162 (m), 1113 (s), 1071 (m), 1030 (w), 1015 (m), 840 (w), 769 (w), 746 (w), 700 (m), 611 (w), 553 (w), 539 (w)  $\text{cm}^{-1}$ ;  $^1\text{H}$  NMR ( $\text{CDCl}_3$ , 400 MHz):  $\delta$  7.54–7.52 (2H, m), 7.32–7.18 (5H, m) 7.17–7.15 (2H, m), 3.27 (2H, ABq,  $\Delta\delta_{\text{AB}} = 0.03$ ,  $J_{\text{AB}} = 14.9$  Hz), 1.83 (3H, s), 1.79 (3H, s);  $^{13}\text{C}$  NMR ( $\text{CDCl}_3$ , 100 MHz):  $\delta$  207.1, 152.9, 147.8, 129.2, 128.7, 128.5, 127.6, 127.1, 126.6, 126.4, 126.0, 125.3 (q,  $J_{\text{CF}} = 3.7$  Hz), 125.2 (q,  $J_{\text{CF}} = 3.8$  Hz), 124.3 (q,  $J_{\text{CF}} = 270.8$  Hz), 56.4, 54.3, 45.8, 32.1, 31.7, 29.1, 27.8, 22.8, 14.3; HRMS (ESI $^+$ ): Calcd for  $\text{C}_{18}\text{H}_{21}\text{F}_3\text{N}_1\text{O}_1[\text{M}+\text{NH}_4]^+$ : 324.1575; Found: 324.1588; specific rotation:  $[\alpha]_{\text{D}}^{20} +16.3$  ( $c = 1.53$   $\text{CHCl}_3$ ) for an enantiomerically enriched sample of 98:2 er. Enantiomeric purity (98:2 er) was determined by HPLC analysis in comparison with authentic racemic material; Chiracel AD(H), 99.5% hexanes, 0.5% *i*-PrOH, 0.5 ml/min, 220nm.

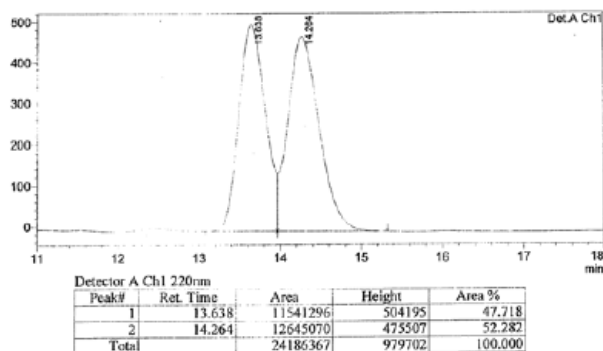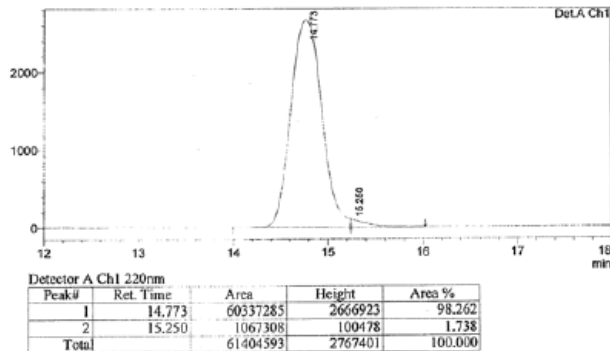

| Retention Time | Area     | Area % | Retention Time | Area    | Area % |
|----------------|----------|--------|----------------|---------|--------|
| 13.638         | 11541296 | 47.718 | 14.773         | 2666923 | 98.262 |
| 14.264         | 12645070 | 52.282 | 15.250         | 1067308 | 1.738  |

**(S)-4-(4-Methoxyphenyl)-4-phenylpentan-2-one (3g):** IR (neat): 3057 (w), 2964 (w), 2935 (w), 2836 (w), 1703 (m), 1609 (w), 1581 (w), 1511 (s), 1495 (w), 1464 (w), 1444 (w), 1415 (w), 1356 (w), 1297 (s), 1250 (m), 1183 (w), 1158 (w), 1113 (w), 1076 (w), 1031 (m), 830 (m), 804 (w), 777 (w), 766 (w), 701 (m), 551 (m),  $\text{cm}^{-1}$ ;  $^1\text{H}$  NMR ( $\text{CDCl}_3$ , 400 MHz):  $\delta$  7.30–7.27 (3H, m), 7.20–7.17 (2H, m) 7.12–7.09 (2H, m), 6.83–6.81 (2H, m), 3.79 (3H, s), 3.20 (2H, ABq,  $\Delta\delta_{\text{AB}} = 0$ ,  $J_{\text{AB}} = 14.4$  Hz), 1.78 (3H, s), 1.70 (3H, s);  $^{13}\text{C}$  NMR ( $\text{CDCl}_3$ , 100 MHz):  $\delta$  208.4, 157.9, 149.1, 140.7, 128.3, 128.0, 127.1, 126.2, 113.6, 55.3, 54.8, 45.1, 32.2, 28.1; HRMS (ESI $^+$ ): Calcd for  $\text{C}_{18}\text{H}_{24}\text{N}_1\text{O}_2[\text{M}+\text{NH}_4]^+$ : 286.1807; Found: 286.1802; specific rotation:  $[\alpha]_{\text{D}}^{20} -13.4$  ( $c = 1.38$   $\text{CHCl}_3$ ) for an enantiomerically enriched sample of 99.8:0.2 er. Enantiomeric purity (99.8:0.2 er) was determined by HPLC analysis in comparison with authentic racemic material; Chiracel AD(H), 99.5% hexanes, 0.5% *i*-PrOH, 0.5 ml/min, 220nm.

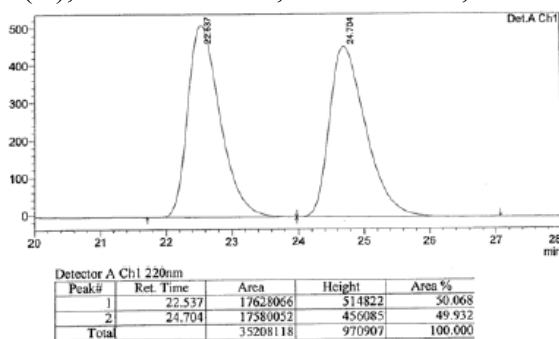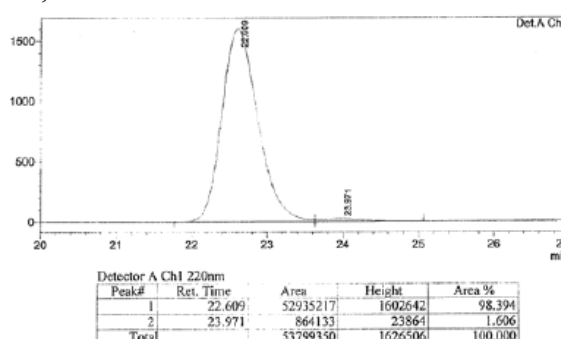

| Retention Time | Area     | Area % | Retention Time | Area     | Area % |
|----------------|----------|--------|----------------|----------|--------|
| 22.537         | 17628066 | 50.068 | 22.822         | 86349    | 0.208  |
| 24.704         | 17580052 | 49.932 | 24.145         | 41446667 | 99.792 |

**(R)-4-(Thiophen-3-yl)-4-(4-(trifluoromethyl)phenyl)pentan-2-one (3h):** IR (neat): 3107 (w), 2972 (w), 2936 (w), 1720 (m), 1618 (w), 1460 (w), 1411 (w), 1358 (w), 1327 (s), 1164 (m), 1122 (s), 1079 (m), 1064 (w), 1015 (w), 932 (w), 841 (w), 783 (w), 748 (w), 728 (w), 682 (w), 659 (w), 625 (w), 608 (w), 541 (w)  $\text{cm}^{-1}$ ;  $^1\text{H}$  NMR ( $\text{CDCl}_3$ , 400 MHz):  $\delta$  7.55–7.54 (2H, d,  $J = 8.0$  Hz), 7.33 (2H, d,  $J = 8.0$  Hz), 7.26 (1H, s), 7.01 (1H, app s), 6.75 (1H, d,  $J = 4.4$  Hz), 3.23 (2H, ABq,  $\Delta\delta_{\text{AB}} = 0$ ,  $J_{\text{AB}} = 16.8$  Hz), 1.84 (3H, s), 1.82 (3H, s);  $^{13}\text{C}$  NMR ( $\text{CDCl}_3$ , 100 MHz):  $\delta$

206.8, 151.9, 149.1, 128.6 ( $q$ ,  $J_{CF} = 32.2$  Hz), 127.4, 127.1, 126.2, 125.3 ( $q$ ,  $J_{CF} = 3.7$  Hz), 124.4 ( $q$ ,  $J_{CF} = 288.7$  Hz), 120.5, 54.4, 43.7, 31.6, 27.8; HRMS (ESI<sup>+</sup>): Calcd for C<sub>16</sub>H<sub>19</sub>F<sub>3</sub>N<sub>1</sub>O<sub>1</sub>S<sub>1</sub>[M+NH<sub>4</sub>]<sup>+</sup>: 330.1139; Found: 330.1143; specific rotation:  $[\alpha]_D^{20} +10.2$  ( $c = 1.03$  CHCl<sub>3</sub>) for an enantiomerically enriched sample of 96:4 er. Enantiomeric purity (96:4 er) was determined by HPLC analysis in comparison with authentic racemic material; Chiracel AS(H), 99.5% hexanes, 0.5% *i*-PrOH, 1.0 ml/min, 220nm.

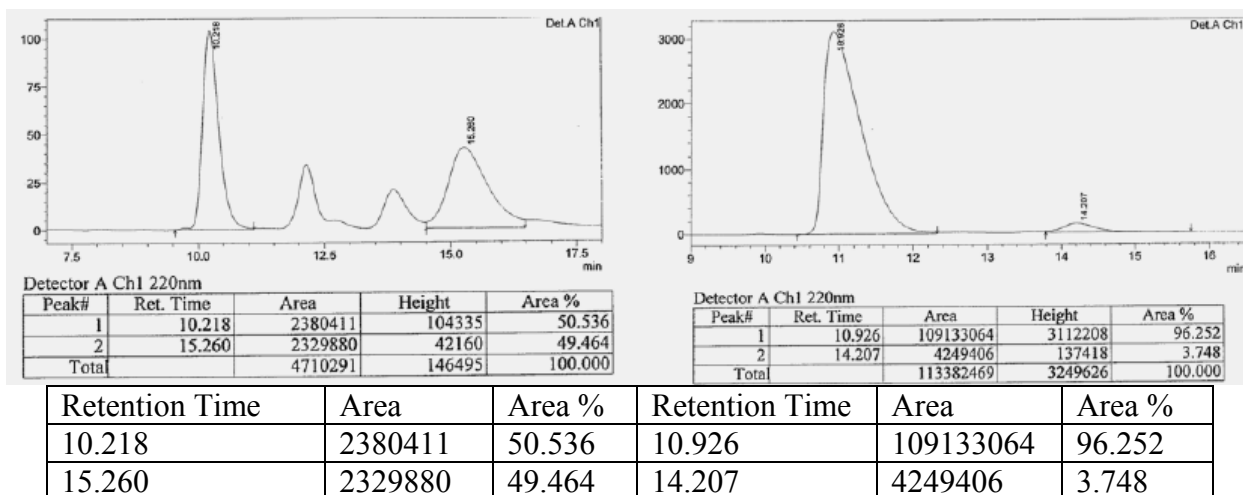

**(R)-4-(4-Methoxyphenyl)-4-(thiophen-3-yl)pentan-2-one (3i):** IR (neat): 3106 (w), 3038 (w), 2961 (w), 2834 (w), 1702 (m), 1609 (w), 1581 (w), 1510 (s), 1462 (w), 1441 (w), 1414 (w), 1355 (w), 1294 (w), 1248 (s), 1182 (m), 1156 (w), 1108 (w), 1085 (w), 1032 (m), 866 (w), 829 (m), 785 (m), 669 (w), 649 (w), 552 (w) cm<sup>-1</sup>; <sup>1</sup>H NMR (CDCl<sub>3</sub>, 400 MHz):  $\delta$  7.24–7.22 (1H, m), 7.14–7.11 (2H, m), 7.00–6.99 (1H, m), 6.83–6.81 (2H, m), 6.80–6.78 (1H, m), 3.79 (3H, s), 3.16 (2H, ABq,  $\Delta\delta_{AB} = 0.06$ ,  $J_{AB} = 13.6$  Hz), 1.76 (3H, s), 1.74 (3H, s); <sup>13</sup>C NMR (CDCl<sub>3</sub>, 100 MHz):  $\delta$  208.1, 158.0, 150.4, 139.8, 127.7, 127.6, 125.7, 120.0, 113.6, 55.3, 55.1, 43.2, 32.1, 27.9; HRMS (ESI<sup>+</sup>): Calcd for C<sub>16</sub>H<sub>22</sub>N<sub>1</sub>O<sub>1</sub>S<sub>1</sub>[M+NH<sub>4</sub>]<sup>+</sup>: 292.1371; Found: 292.1377; specific rotation:  $[\alpha]_D^{20} -9.9$  ( $c = 0.66$  CHCl<sub>3</sub>) for an enantiomerically enriched sample of 99.5:0.5 er. Enantiomeric purity (99.5:0.5 er) was determined by HPLC analysis in comparison with authentic racemic material; Chiracel OD(H), 99.5% hexanes, 0.5% *i*-PrOH, 0.8 mL/min, 220 nm.

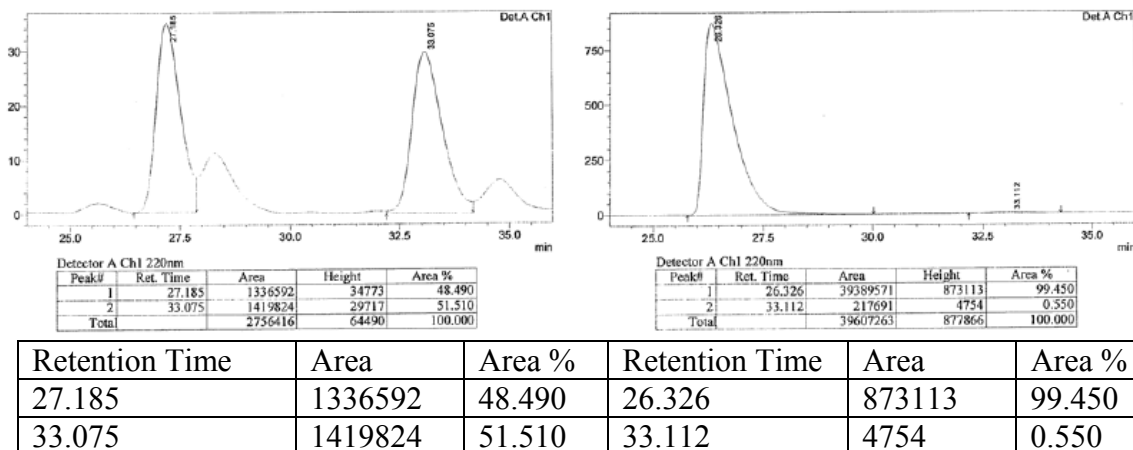

**(S)-4-Cyclohexyl-4-phenylpentan-2-one (3j):** IR (neat): 3108 (w), 3088 (w), 3056 (w), 3023 (w), 2927 (s), 2852 (m), 1702 (m), 1601 (w), 1496 (w), 1446 (w), 1420 (w), 1377 (w), 1356 (w), 1298 (w), 1271 (w), 1243 (w), 1182 (w), 1167 (w), 1135 (w), 1072 (w), 1031 (w), 970 (w), 933 (w), 894 (w), 844 (w), 780 (w), 761 (w), 700 (m), 549 (w)  $\text{cm}^{-1}$ ;  $^1\text{H}$  NMR ( $\text{CDCl}_3$ , 400 MHz):  $\delta$  7.30–7.28 (4H, m), 7.20–7.15 (1H, m), 2.81 (2H, ABq,  $\Delta\delta_{\text{AB}} = 0.32$ ,  $J_{\text{AB}} = 14.4$  Hz), 1.81–1.72 (1H, m), 1.71 (3H, s), 1.63–1.55 (2 H, m), 1.37 (3H, s), 1.31–1.18 (4H, m), 1.10–1.00 (2H, m), 0.98–0.83 (2H, m);  $^{13}\text{C}$  NMR ( $\text{CDCl}_3$ , 100 MHz):  $\delta$  209.0, 146.6, 128.2, 126.6, 125.9, 53.9, 49.4, 43.6, 32.2, 31.7, 28.0, 27.6, 27.3, 27.2, 26.8; HRMS ( $\text{ESI}^+$ ): Calcd for  $\text{C}_{17}\text{H}_{28}\text{N}_1\text{O}_1$   $[\text{M}+\text{NH}_4]^+$ : 262.2171; Found: 262.2172; specific rotation:  $[\alpha]_{\text{D}}^{20} -51$ . ( $c = 0.43$   $\text{CHCl}_3$ ) for an enantiomerically enriched sample of 99:1 er. Enantiomeric purity (97.5:2.5 er) was determined by HPLC analysis in comparison with authentic racemic material; Chiracel AD(H), 99.5% hexanes, 0.5% *i*-PrOH, 0.8 mL/min, 220 nm.

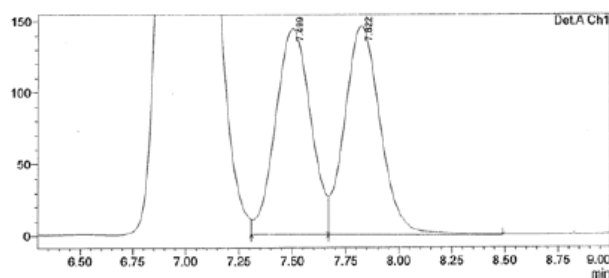

| Peak# | Ret. Time | Area    | Height | Area %  |
|-------|-----------|---------|--------|---------|
| 1     | 7.499     | 1643301 | 144368 | 48.840  |
| 2     | 7.822     | 1721330 | 146377 | 51.160  |
| Total |           | 3364632 | 290745 | 100.000 |

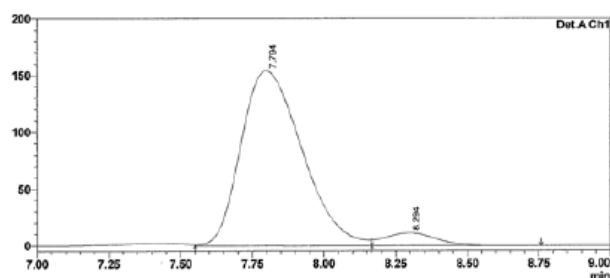

| Peak# | Ret. Time | Area    | Height | Area %  |
|-------|-----------|---------|--------|---------|
| 1     | 7.794     | 2283874 | 154048 | 94.441  |
| 2     | 8.294     | 134442  | 11045  | 5.559   |
| Total |           | 2418316 | 165094 | 100.000 |

| Retention Time | Area    | Area % | Retention Time | Area    | Area % |
|----------------|---------|--------|----------------|---------|--------|
| 7.499          | 1643301 | 48.840 | 7.794          | 2283874 | 94.441 |
| 7.822          | 1721330 | 51.160 | 8.294          | 134442  | 5.559  |

■ **Representative Procedure for Catalytic Enantioselective Addition of Alkylaluminum Reagents to Acyclic Enones:** An oven-dried 1 dram vial, equipped with a stir bar was charged with chiral NHC–Ag complex **1** (0.3 mg, 0.5  $\mu\text{mol}$ ) and  $\text{Cu}(\text{OTf})_2$  (0.16 mg, 0.50  $\mu\text{mol}$ ), weighed out under a  $\text{N}_2$  atmosphere in a glove box. The vial was sealed with a septum cap and removed from the glove box. Tetrahydrofuran (0.5 mL) was added to the vial and the resulting solution was allowed to stir for five minutes prior to cooling to  $-30$   $^\circ\text{C}$ . Triethylaluminum (34.2  $\mu\text{L}$ , 0.250 mmol) was added, resulting in a brown solution to which a solution of the enone substrate (*E*)-4-methyl-5-phenylpent-3-en-2-one (0.2M, 0.5 ml, 100  $\mu\text{mol}$ ) was added. The septum cap was exchanged for a solid cap and the vial was transferred to a cryocool ( $-30$   $^\circ\text{C}$ ) for 1 hour. The reaction was quenched with a saturated solution of sodium potassium tartrate (1.0 mL). After the mixture was allowed to warm to 22  $^\circ\text{C}$ , the solution was diluted with  $\text{Et}_2\text{O}$  and the layers were separated. The aqueous layer was washed with  $\text{Et}_2\text{O}$  (3 x 1 mL). The combined organic layers were passed through a short plug of silica (4 cm x 1 cm) eluting with  $\text{Et}_2\text{O}$  (10.0 mL). The organic layer was concentrated to a yellow oil and purified by silica gel



chromatography (10:1 hexanes/Et<sub>2</sub>O) to afford 17.1 mg of (*S*)-4-methyl-4-(thiophen-2-yl)hexan-2-one as a clear, yellow oil (0.087 mmol, 87% yield).

### ■ Catalyst Screen for Alkyl Additions:

**Table S2:** Catalyst Screen for Aryl Addition to Acyclic Enones<sup>[a]</sup>

5 mol % Cu(OTf)<sub>2</sub>  
5 mol % **NHC-Ag**  
3.0 equiv. Et<sub>3</sub>Al  
thf, -30 °C, 24 h

2.5 mol % **IIc**, 5 mol % **Cu Source**  
3.0 equiv. Et<sub>3</sub>Al, thf, 30 min, -30 °C

| entry | NHC-Ag     | conv. [%] <sup>b</sup> | yield [%] <sup>c</sup> | er <sup>d</sup> |
|-------|------------|------------------------|------------------------|-----------------|
| 1     | <b>Ia</b>  | >98                    | 79                     | 83:17           |
| 2     | <b>Ib</b>  | >98                    | 60                     | 76.5:23.5       |
| 3     | <b>Ila</b> | >98                    | 65                     | 87.5:12.5       |
| 4     | <b>Ilb</b> | >98                    | 73                     | 90:10           |
| 5     | <b>Ilc</b> | >98                    | 80                     | 98:2            |
| 6     | <b>Ild</b> | 12                     | nd                     | 92:8            |
| 7     | <b>Ile</b> | >98                    | 60                     | 76.5:23.5       |
| 8     | <b>III</b> | >98                    | 78                     | 84:16           |

  

| entry | Cu source                            | conv. [%] <sup>b</sup> | er <sup>d</sup> |
|-------|--------------------------------------|------------------------|-----------------|
| 1     | CuBr <sub>2</sub>                    | 35                     | 80:20           |
| 2     | CuCl <sub>2</sub>                    | 88                     | 93:7            |
| 3     | CuCl <sub>2</sub> •2H <sub>2</sub> O | 5                      | 95:5            |
| 4     | CuOTf <sub>2</sub>                   | >98                    | 99:1            |

[a]-[d] See Table S1.

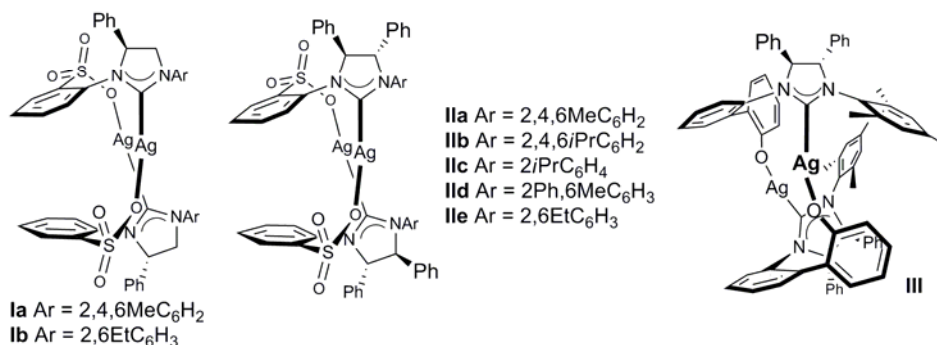

### ■ Analytical Data of Alkyl Addition Products:

**(*S*)-4-Methyl-4-phenylhexan-2-one (5a):** IR (neat): 3089 (w), 3058 (w), 3026 (w), 2967 (m), 2932 (m), 2880 (m), 1703 (s), 1601 (w), 1496 (m), 1460 (m), 1446 (m), 1419 (m), 1378 (m), 1357 (s), 1250 (w), 1199 (m), 1168 (w), 1134 (w), 1108 (w), 1081 (w), 1053 (w), 1031 (w), 1007 (w), 965 (w), 922 (w), 760 (m), 699 (s), 549 (m) cm<sup>-1</sup>; <sup>1</sup>H NMR (CDCl<sub>3</sub>, 400 MHz): δ 7.31–7.28 (3H, m), 7.20–7.16 (2H, m), 2.73 (2H, ABq, Δδ<sub>AB</sub> = 0.29, J<sub>AB</sub> = 14.3 Hz), 1.88–1.83 (1H, m), 1.76 (3H, s), 1.68 (1H, m), 1.40 (3H, s), 0.68 (3H, t); <sup>13</sup>C NMR (CDCl<sub>3</sub>, 100 MHz): δ 208.5, 146.4, 128.4, 126.3, 126.0, 56.2, 40.9, 35.6, 32.1, 23.3, 8.6; HRMS (ESI<sup>+</sup>): Calcd for C<sub>13</sub>H<sub>19</sub>O<sub>1</sub> [M+H]<sup>+</sup>: 191.1439; Found: 191.1436; specific rotation: [α]<sub>D</sub><sup>20</sup> +54.5 (*c* = 0.600 CHCl<sub>3</sub>) for an enantiomerically enriched sample of 97:3 er. Enantiomeric purity (97:3 er) was determined by GC analysis in comparison with authentic racemic material; β-dex column, 100 °C, 15 psi.

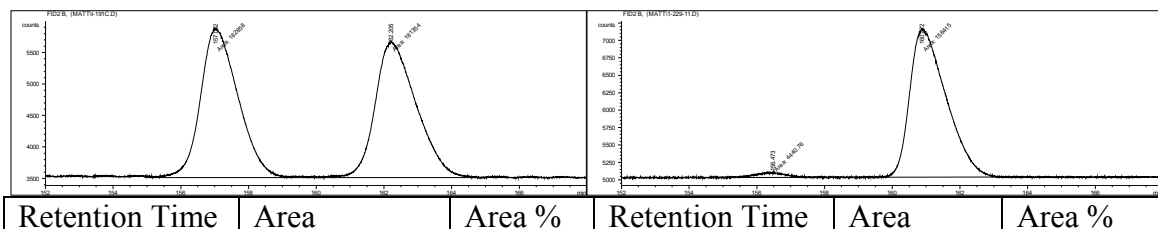

|         |          |        |         |          |        |
|---------|----------|--------|---------|----------|--------|
| 157.022 | 182858.2 | 50.207 | 156.473 | 4440.8   | 2.727  |
| 162.205 | 181353.8 | 49.793 | 160.872 | 158415.2 | 97.273 |

**(R)-4-Methyl-4-phenylhexan-2-one (R-5a):** IR (neat): 3089 (w), 3058 (w), 3026 (w), 2967 (m), 2932 (m), 2880 (m), 1703 (s), 1601 (w), 1496 (m), 1460 (m), 1446 (m), 1419 (m), 1378 (m), 1357 (s), 1250 (w), 1199 (m), 1168 (w), 1134 (w), 1108 (w), 1081 (w), 1053 (w), 1031 (w), 1007 (w), 965 (w), 922 (w), 760 (m), 699 (s), 549 (m)  $\text{cm}^{-1}$ ;  $^1\text{H}$  NMR ( $\text{CDCl}_3$ , 400 MHz):  $\delta$  7.31–7.28 (3H, m), 7.20–7.16 (2H, m), 2.73 (2H, ABq,  $\Delta\delta_{\text{AB}} = 0.29$ ,  $J_{\text{AB}} = 14.3$  Hz), 1.88–1.83 (1H, m), 1.76 (3H, s), 1.68 (1H, m), 1.40 (3H, s), 0.68 (3H, t);  $^{13}\text{C}$  NMR ( $\text{CDCl}_3$ , 100 MHz):  $\delta$  208.5, 146.4, 128.4, 126.3, 126.0, 56.2, 40.9, 35.6, 32.1, 23.3, 8.6; HRMS ( $\text{ESI}^+$ ): Calcd for  $\text{C}_{13}\text{H}_{19}\text{O}_1$   $[\text{M}+\text{H}]^+$ : 191.1439; Found: 191.1436; specific rotation:  $[\alpha]_{\text{D}}^{20} -0.7$  ( $c = 0.04$   $\text{CHCl}_3$ ) for an enantiomerically enriched sample of >99:1 er. Enantiomeric purity (>99:1 er) was determined by GC analysis in comparison with authentic racemic material;  $\beta$ -dex column, 100 °C, 15 psi.

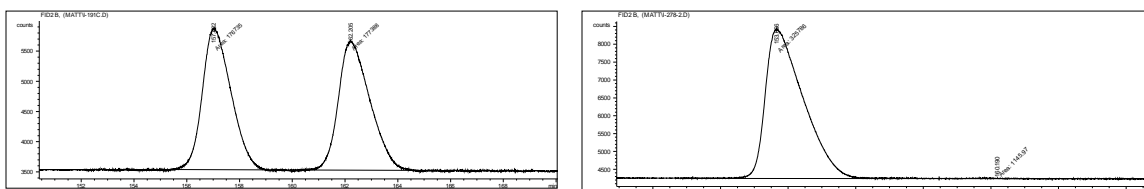

| Retention Time | Area     | Area % | Retention Time | Area     | Area % |
|----------------|----------|--------|----------------|----------|--------|
| 157.022        | 182858.2 | 50.207 | 153.656        | 325785.8 | 99.649 |
| 162.205        | 181353.8 | 49.793 | 160.19         | 1146     | 0.351  |

**(R)-4-Methyl-4-(thiophen-2-yl)hexan-2-one (5b):** IR (neat): 2967 (m), 2922 (w), 2879 (w), 1703 (s), 1460 (m), 1378 (m), 1356 (m), 1237 (m), 1156 (m), 1132 (w), 1087 (w), 1054 (w), 1025 (w), 1006 (w), 962 (w), 918 (w), 851 (m), 827 (m), 796 (w), 692 (s), 605 (w), 584 (w), 527 (m), 413 (w)  $\text{cm}^{-1}$ ;  $^1\text{H}$  NMR (400 MHz,  $\text{CDCl}_3$ ):  $\delta$  7.16 (1H, dd,  $J = 5.1, 1.2$  Hz), 6.92 (1H, dd,  $J = 5.1, 3.5$  Hz), 6.80 (1H, dd,  $J = 3.7, 1.2$  Hz), 2.73 (2H, ABq,  $\Delta\delta_{\text{AB}} = 0.17$ ,  $J_{\text{AB}} = 14.3$  Hz), 1.86 (3H, s), 1.80 (2H, m), 1.45 (3H, s), 0.79 (3H, t,  $J = 7.4$  Hz);  $^{13}\text{C}$  NMR (100 MHz,  $\text{CDCl}_3$ ):  $\delta$  208.9, 153.7, 127.1, 123.9, 123.7, 56.6, 40.5, 36.6, 32.0, 24.7, 8.5; HRMS ( $\text{ESI}^+$ ): Calcd for  $\text{C}_{11}\text{H}_{17}\text{OS}$   $[\text{M}+\text{H}]^+$ : 197.1000; Found: 197.0996; specific rotation  $[\alpha]_{\text{D}}^{20} +57.5$  ( $c = 1.07$  in  $\text{CHCl}_3$ ) for an enantiomerically enriched sample of 98.5:1.5 er. Enantiomeric purity (98.5:1.5 er) was determined by HPLC analysis in comparison with authentic racemic material; Chiralcel OD(H), 99% hexanes, 1% *i*-PrOH, 1.0 mL/min, 220 nm.

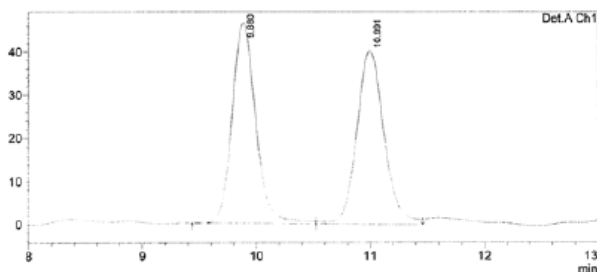

| Peak# | Ret. Time | Area    | Height | Area %  |
|-------|-----------|---------|--------|---------|
| 1     | 9.880     | 672431  | 46478  | 49.963  |
| 2     | 10.991    | 673433  | 40333  | 50.037  |
| Total |           | 1345864 | 86811  | 100.000 |

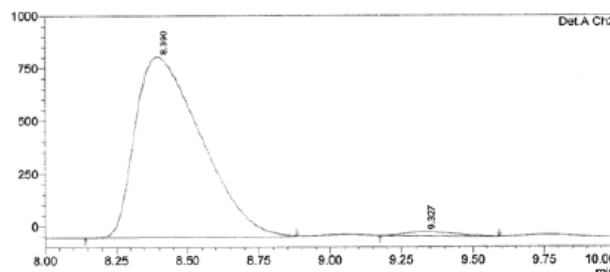

| Peak# | Ret. Time | Area     | Height | Area %  |
|-------|-----------|----------|--------|---------|
| 1     | 8.390     | 13807125 | 855664 | 98.451  |
| 2     | 9.327     | 217302   | 17254  | 1.549   |
| Total |           | 14024428 | 872918 | 100.000 |

| Retention Time | Area   | Area % | Retention Time | Area     | Area % |
|----------------|--------|--------|----------------|----------|--------|
| 9.880          | 672431 | 49.963 | 8.390          | 13807125 | 98.451 |
| 10.991         | 673433 | 50.037 | 9.327          | 217302   | 1.549  |

**(S)-4-Methyl-4-(4-(trifluoromethyl)phenyl)hexan-2-one (5c):** IR (neat): 2970 (w), 1936 (w), 2884 (w), 1720 (w), 1619 (w), 1462 (w), 1411 (w), 1379 (w), 1359 (w), 1327 (s), 1165 (m), 1116 (s), 1069 (m), 1016 (w), 965 (w), 921 (w), 839 (w), 709 (w), 604 (w), 540 (w), 401 (w)  $\text{cm}^{-1}$ ;  $^1\text{H}$  NMR ( $\text{CDCl}_3$ , 400 MHz):  $\delta$  7.56 (2H, d,  $J = 8.2$  Hz), 7.41 (2H, d,  $J = 8.2$  Hz), 2.80 (2H, ABq,  $\Delta\delta_{\text{AB}} = 0.27$ ,  $J_{\text{AB}} = 15.5$  Hz), 1.84 (3H, s), 1.83–1.62 (2H, m), 1.42 (3H, s), 0.63 (3H, t,  $J = 10.0$  Hz);  $^{13}\text{C}$  NMR ( $\text{CDCl}_3$ , 100 MHz):  $\delta$  207.0, 150.8, 128.2 (q,  $J_{\text{C-F}} = 32.0$  Hz), 126.5, 125.1, 124.2 (q,  $J_{\text{C-F}} = 270.9$  Hz), 55.2, 40.7, 35.6, 31.8, 23.2, 8.3; HRMS (ESI $^+$ ): Calcd for  $\text{C}_{14}\text{H}_{18}\text{F}_3\text{O}$   $[\text{M}+\text{H}]^+$ : 259.1310; Found: 259.1310; specific rotation:  $[\alpha]_{\text{D}}^{20} +17.6$  ( $c = 1.36$ ,  $\text{CHCl}_3$ ) for an enantiomerically enriched sample of 95.5:4.5 er. Enantiomeric purity (95.5:4.5 er) was determined by HPLC analysis in comparison with authentic racemic material; Chiracel OD(H), 99% hexanes, 1% *i*-PrOH, 1.0 mL/min, 220 nm.

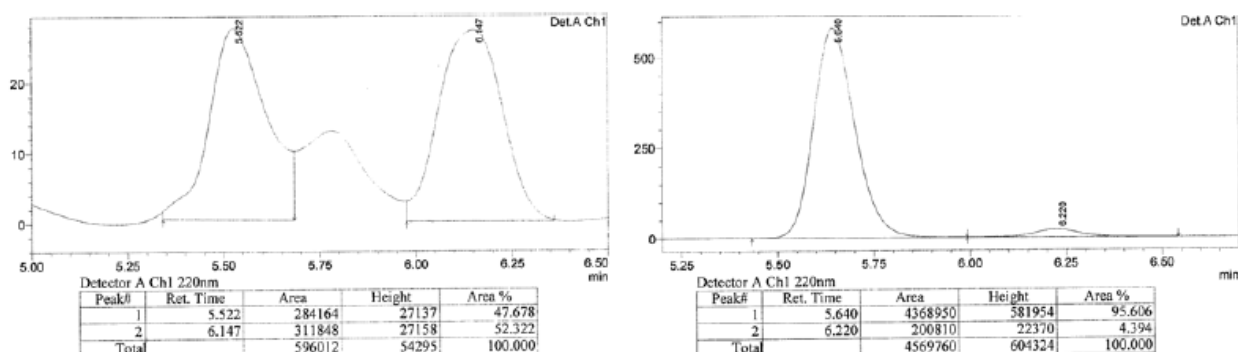

| Retention Time | Area   | Area % | Retention Time | Area    | Area % |
|----------------|--------|--------|----------------|---------|--------|
| 5.522          | 284164 | 47.678 | 5.640          | 4368950 | 95.606 |
| 6.147          | 311848 | 52.322 | 6.220          | 200810  | 4.394  |

**(S)-4-(4-Methoxyphenyl)-4-methylhexan-2-one (S-5d):** IR (neat): 3061 (w), 3037 (w), 2965 (w), 2936 (w), 2879 (w), 2836 (w), 1702 (m), 1611 (w), 1581 (w), 1513 (s), 1463 (w), 1415 (w), 1377 (w), 1357 (w), 1292 (w), 1250 (s), 1186 (m), 1136 (w), 1116 (w), 1035 (m), 1010 (w), 965 (w), 916 (w), 829 (m), 806 (w), 672 (w), 612 (w), 554 (w)  $\text{cm}^{-1}$ ;  $^1\text{H}$  NMR ( $\text{CDCl}_3$ , 400 MHz):  $\delta$  7.24–7.21 (2H, m), 6.87–6.85 (2H, m), 3.80 (3H, s), 2.70 (2H, ABq,  $\Delta\delta_{\text{AB}} = 0.28$ ,  $J_{\text{AB}} = 13.9$  Hz), 1.86–1.80 (1H, m), 1.76 (3H, s), 1.67–1.54 (1H, m), 1.38 (3H, s), 0.68 (3H, s);  $^{13}\text{C}$  NMR ( $\text{CDCl}_3$ , 100 MHz):  $\delta$  208.5, 157.6, 138.2, 127.2, 113.5, 56.2, 55.1, 40.1, 35.6, 32.0, 23.3, 8.4; HRMS (ESI $^+$ ): Calcd for  $\text{C}_{14}\text{H}_{20}\text{O}_2$   $[\text{M}+\text{H}]^+$ : 220.1463; Found: 220.1463; specific rotation:  $[\alpha]_{\text{D}}^{20} +40.5$  ( $c = 0.147$ ,  $\text{CHCl}_3$ ) for an enantiomerically enriched sample of 99:1 er. Enantiomeric purity (99:1 er) was determined by HPLC analysis in comparison with authentic racemic; Chiracel OD(H), 99% hexanes, 1% *i*-PrOH, 1.0 mL/min, 220 nm.

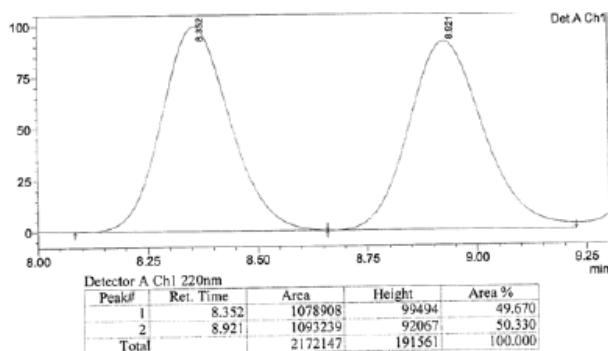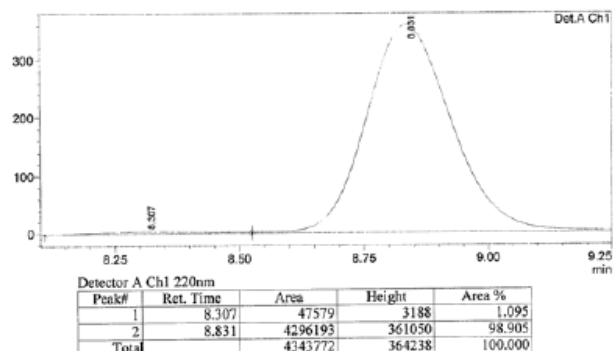

| Retention Time | Area    | Area % | Retention Time | Area    | Area % |
|----------------|---------|--------|----------------|---------|--------|
| 8.352          | 1078908 | 49.670 | 8.307          | 47579   | 1.095  |
| 8.921          | 1093239 | 50.330 | 8.831          | 4296193 | 98.905 |

**(R)-4-(4-Methoxyphenyl)-4-methylhexan-2-one (5d):** IR (neat): 3061 (w), 3037 (w), 2965 (w), 2936 (w), 2879 (w), 2836 (w), 1702 (m), 1611 (w), 1581 (w), 1513 (s), 1463 (w), 1415 (w), 1377 (w), 1357 (w), 1292 (w), 1250 (s), 1186 (m), 1136 (w), 1116 (w), 1035 (m), 1010 (w), 965 (w), 916 (w), 829 (m), 806 (w), 672 (w), 612 (w), 554 (w)  $\text{cm}^{-1}$ ;  $^1\text{H}$  NMR ( $\text{CDCl}_3$ , 400 MHz):  $\delta$  7.24–7.21 (2H, m), 6.87–6.85 (2H, m), 3.80 (3H, s), 2.70 (2H, ABq,  $\Delta\delta_{\text{AB}} = 0.28$ ,  $J_{\text{AB}} = 13.9$  Hz), 1.86–1.80 (1H, m), 1.76 (3H, s), 1.67–1.54 (1H, m), 1.38 (3H, s), 0.68 (3H, s);  $^{13}\text{C}$  NMR ( $\text{CDCl}_3$ , 100 MHz):  $\delta$  208.5, 157.6, 138.2, 127.2, 113.5, 56.2, 55.1, 40.1, 35.6, 32.0, 23.3, 8.4; HRMS (ESI<sup>+</sup>): Calcd for  $\text{C}_{14}\text{H}_{24}\text{N}_1\text{O}_2$  [ $\text{M}+\text{NH}_4$ ]<sup>+</sup>: 238.1807; Found: 23.1804; specific rotation:  $[\alpha]_{\text{D}}^{20} -44.7$  ( $c = 1.11$ ,  $\text{CHCl}_3$ ) for an enantiomerically enriched sample of 97:3 er. Enantiomeric purity (97:3 er) was determined by HPLC analysis in comparison with authentic racemic; Chiralcel OD(H), 99% hexanes, 1% *i*-PrOH, 1.0 mL/min, 220 nm.

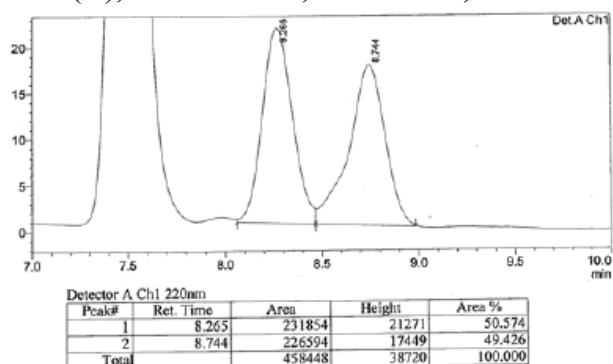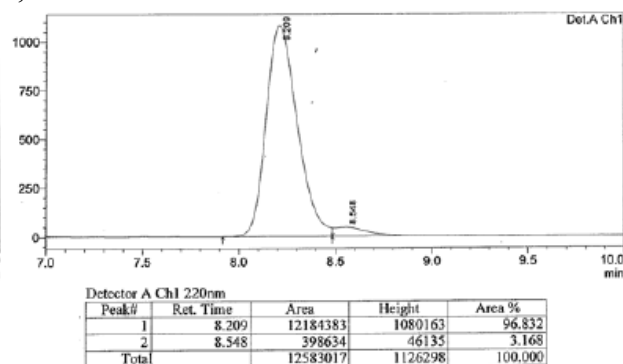

| Retention Time | Area   | Area % | Retention Time | Area    | Area % |
|----------------|--------|--------|----------------|---------|--------|
| 8.265          | 231854 | 50.574 | 8.209          | 1080163 | 96.832 |
| 8.744          | 226594 | 49.426 | 8.548          | 46135   | 3.168  |

**(R)-4-Methyl-4-(naphthalen-2-yl)hexan-2-one (5e):** IR (neat): 3056 (w), 2966 (m), 2932 (w), 2878 (w), 1703 (s), 1632 (w), 1599 (w), 1505 (w), 1461 (w), 1418 (w), 1378 (w), 1356 (m), 1275 (w), 1246 (w), 1198 (w), 1168 (w), 1132 (w), 1055 (w), 1018 (w), 964 (w), 949 (w), 895 (w), 855 (w), 818 (m), 747 (m), 549 (w), 477 (m)  $\text{cm}^{-1}$ ;  $^1\text{H}$  NMR ( $\text{CDCl}_3$ , 400 MHz):  $\delta$  7.83–7.80 (3H,

m), 7.70 (1H, m), 7.53–7.44 (3H, m), 2.84 (2H, ABq,  $\Delta\delta_{AB} = 0.31$ ,  $J_{AB} = 14.1$  Hz), 1.98–1.94 (1H, m), 1.76 (3H, s), 1.79–1.73 (1H, m), 1.53 (3H, s), 0.69 (3H, t);  $^{13}\text{C}$  NMR ( $\text{CDCl}_3$ , 100 MHz):  $\delta$  208.2, 143.7, 131.8, 128.0, 127.9, 127.3, 125.9, 125.5, 124.9, 124.6, 55.9, 40.9, 35.4, 32.0, 23.2, 8.5; HRMS (ESI<sup>+</sup>): Calcd for  $\text{C}_{17}\text{H}_{24}\text{O}_1\text{N}_1$   $[\text{M}+\text{NH}_4]^+$ : 258.1858; Found: 258.1857; specific rotation:  $[\alpha]_{\text{D}}^{20} +63.5$  ( $c = 1.14$ ,  $\text{CHCl}_3$ ) for an enantiomerically enriched sample of 97.5:2.5 er. Enantiomeric purity (97.5:2.5 er) was determined by HPLC analysis in comparison with authentic racemic material; Chiracel OD(H), 99% hexanes, 1% *i*-PrOH, 1.0 mL/min, 220 nm.

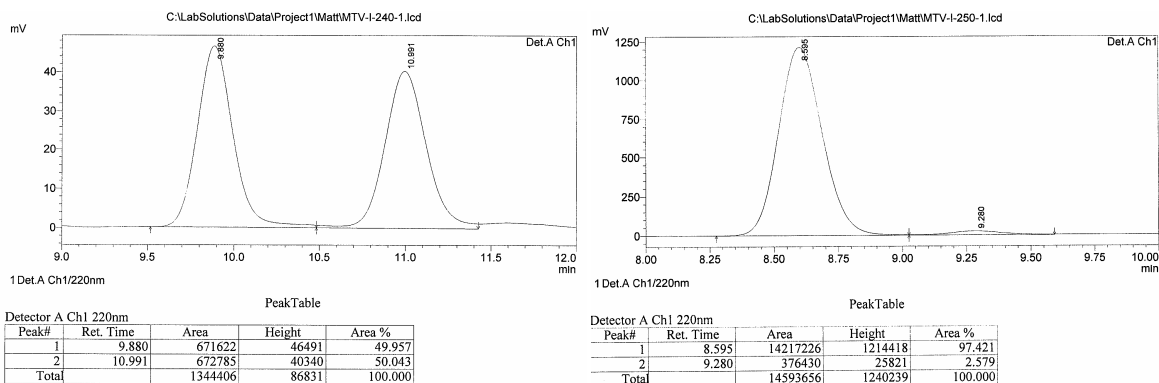

| Retention Time | Area   | Area % | Retention Time | Area     | Area % |
|----------------|--------|--------|----------------|----------|--------|
| 9.880          | 671622 | 49.957 | 8.595          | 14217226 | 97.421 |
| 10.991         | 672785 | 50.043 | 9.280          | 376430   | 2.579  |

**(S)-4-(2-Bromophenyl)-4-methylhexan-2-one (5f):** IR (neat): 3059 (w), 2964 (s), 2928 (s), 2880 (w), 2856 (w), 2194 (w), 1717 (s), 1616 (w), 1589 (w), 1465 (m), 1425 (w), 1378 (w), 1356 (m), 1315 (w), 1296 (w), 1261 (w), 1201 (w), 1165 (w), 1134 (w), 1109 (w), 1045 (w), 1016 (m), 961 (w), 787 (w), 754 (s), 727 (w), 703 (w), 649 (w), 552 (w), 412 (w)  $\text{cm}^{-1}$ ;  $^1\text{H}$  NMR ( $\text{CDCl}_3$ , 400 MHz):  $\delta$  7.58–7.55 (1H, m), 7.39–7.38 (1H, m), 7.26–7.16 (1H, m), 7.07–7.03 (1H, m), 3.86 (1H, d,  $J = 15.7$  Hz), 2.64 (1H, d,  $J = 15.7$  Hz), 2.53 (1H, sextet,  $J = 6.8$  Hz), 1.87 (3H, s), 1.62–1.55 (1H, m), 1.52 (3H, s), 0.63 (3H, t);  $^{13}\text{C}$  NMR ( $\text{CDCl}_3$ , 100 MHz):  $\delta$  207.8, 143.2, 135.5, 130.7, 127.8, 127.2, 121.8, 52.5, 42.4, 32.0, 31.2, 25.5, 8.5; HRMS (ESI<sup>+</sup>): Calcd for  $\text{C}_{13}\text{H}_{17}\text{Br}_1\text{O}_1$   $[\text{M}+\text{H}]^+$ : 269.0541; Found: 269.0539; specific rotation:  $[\alpha]_{\text{D}}^{20} +7.9$  ( $c = 0.46$ ,  $\text{CHCl}_3$ ) for an enantiomerically enriched sample of 99.9:0.1 er. Enantiomeric purity (99.9:0.1 er) was determined by HPLC analysis in comparison with authentic racemic material; Chiracel OD, 99% hexanes, 1% *i*-PrOH, 1.0 mL/min, 220 nm.

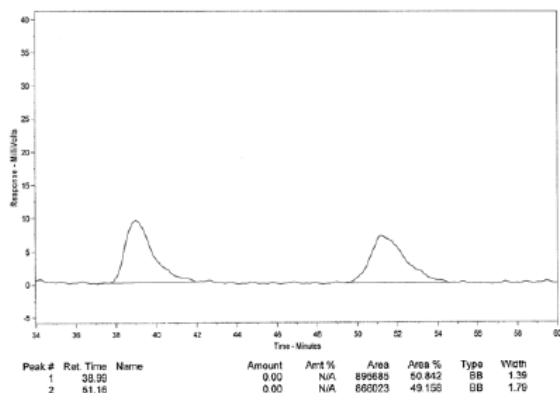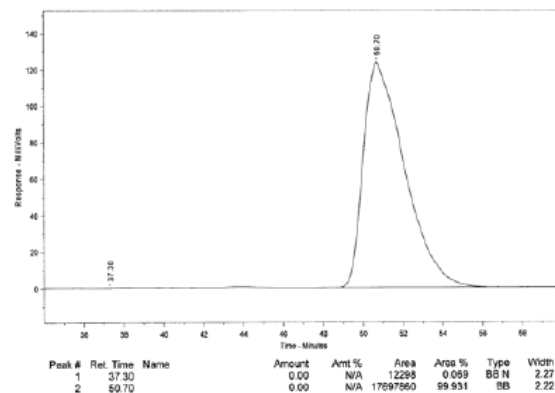

| Retention Time | Area   | Area % | Retention Time | Area     | Area % |
|----------------|--------|--------|----------------|----------|--------|
| 38.99          | 895685 | 50.842 | 37.30          | 12298    | 0.069  |
| 51.16          | 866023 | 49.158 | 50.70          | 17697860 | 99.931 |

**(S)-4-(3-Fluorophenyl)-4-methylhexan-2-one (5g):** IR (neat): 3072 (w), 2968 (s), 2931 (w), 2881 (w), 1717 (s), 1703 (s), 1614 (m), 1585 (s), 1489 (m), 1460 (m), 1434 (m), 1378 (m), 1357 (s), 1324 (w), 1273 (m), 1223 (m), 1193 (m), 1165 (m), 1133 (w), 1105 (w), 1073 (w), 1052 (w), 967 (w), 924 (m), 911 (m), 889 (w), 867 (w), 780 (s), 701 (s), 526 (w), 447 (w)  $\text{cm}^{-1}$ ;  $^1\text{H}$  NMR ( $\text{CDCl}_3$ , 400 MHz):  $\delta$  7.30–7.25 (1H, m), 7.09–7.06 (1H, m), 7.02–6.98 (1H, m) 6.91–6.86 (1H, m), 2.74 (2H, ABq,  $\Delta\delta_{\text{AB}} = 0.27$ ,  $J_{\text{AB}} = 14.9$  Hz), 1.84 (3H, s), 1.84–1.76 (1H, m), 1.71–1.63 (1H, m), 1.40 (3H, s), 0.67 (3H, t);  $^{13}\text{C}$  NMR ( $\text{CDCl}_3$ , 100 MHz):  $\delta$  207.5, 163.0 ( $J_{\text{C-F}} = 245.3$  Hz), 149.4 ( $J_{\text{C-F}} = 0.07$  Hz), 129.5 ( $J_{\text{C-F}} = 0.08$  Hz), 121.8 ( $J_{\text{C-F}} = 0.02$  Hz), 113.4 ( $J_{\text{C-F}} = 0.20$  Hz), 112.7 ( $J_{\text{C-F}} = 0.20$  Hz), 55.5, 40.7, 35.5, 31.9, 23.1, 8.3; HRMS ( $\text{ESI}^+$ ): Calcd for  $\text{C}_{13}\text{H}_{17}\text{F}_1\text{O}_1$   $[\text{M}+\text{H}]^+$ : 209.1342; Found: 209.1345; specific rotation:  $[\alpha]_{\text{D}}^{20} +40.2$  ( $c = 0.500$ ,  $\text{CHCl}_3$ ) for an enantiomerically enriched sample of 96.5:3.5 er. Enantiomeric purity (96.5:3.5 er) was determined by HPLC analysis in comparison with authentic racemic material; Chiralcel OD-H, 99% hexanes, 1% *i*-PrOH, 1.0 mL/min, 220 nm.

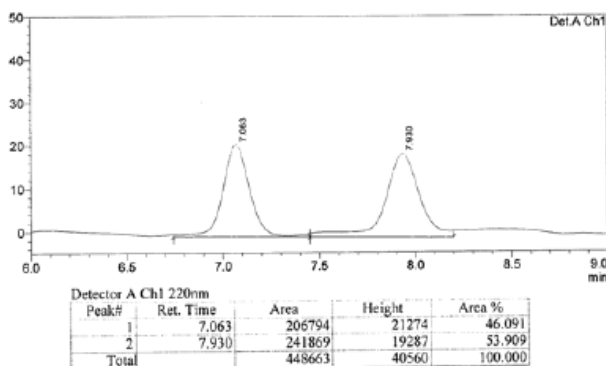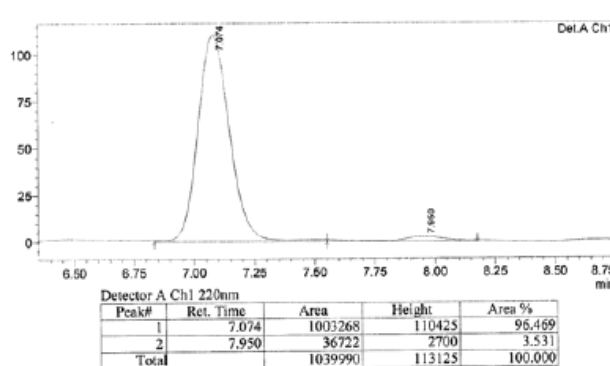

| Retention Time | Area   | Area % | Retention Time | Area     | Area % |
|----------------|--------|--------|----------------|----------|--------|
| 7.063          | 206794 | 46.091 | 7.074          | 10003268 | 96.469 |
| 7.930          | 241869 | 53.909 | 7.950          | 36722    | 3.532  |

**(R)-4-Benzyl-4-methylhexan-2-one (6a):** IR (neat): 3084 (w), 3061 (w), 3028 (w), 2963 (m), 2929 (m), 2880 (m), 1714 (s), 1602 (w), 1495 (w), 1454 (m), 1404 (w), 1359 (m), 1196 (w), 1153 (w), 1076 (w), 1053 (w), 1032 (w), 1009 (w), 974 (w), 914 (w), 759 (w), 723 (m), 703 (s), 630 (w), 598 (w), 535 (w), 509 (w)  $\text{cm}^{-1}$ ;  $^1\text{H}$  NMR ( $\text{CDCl}_3$ , 400 MHz):  $\delta$  7.28–7.20 (2.5H, m), 7.13–7.11 (2.5H, m), 2.71 (2H, ABq,  $\Delta\delta_{\text{AB}} = 0.097$ ,  $J_{\text{AB}} = 13.1$  Hz), 2.27–2.25 (2H, m), 2.11 (3H, s), 1.51–1.36 (2H, m), 0.95 (3H, s), 0.89 (3H, t);  $^{13}\text{C}$  NMR ( $\text{CDCl}_3$ , 100 MHz):  $\delta$  209.0, 138.8, 130.6, 127.8, 125.9, 50.1, 44.7, 37.2, 32.3, 31.5, 24.3, 8.3; HRMS ( $\text{ESI}^+$ ): Calcd for  $\text{C}_{14}\text{H}_{21}\text{O}_1$   $[\text{M}+\text{H}]^+$ : 205.1592; Found: 205.1600; specific rotation:  $[\alpha]_{\text{D}}^{20} -7.70$  ( $c = 1.35$ ,  $\text{CHCl}_3$ ) for an enantiomerically enriched sample of 89:11 er. Enantiomeric purity (89:11 er) was determined by HPLC analysis in comparison with authentic racemic material; Chiracel OD(H), 99% hexanes, 1% *i*-PrOH, 1.0 mL/min, 220 nm.

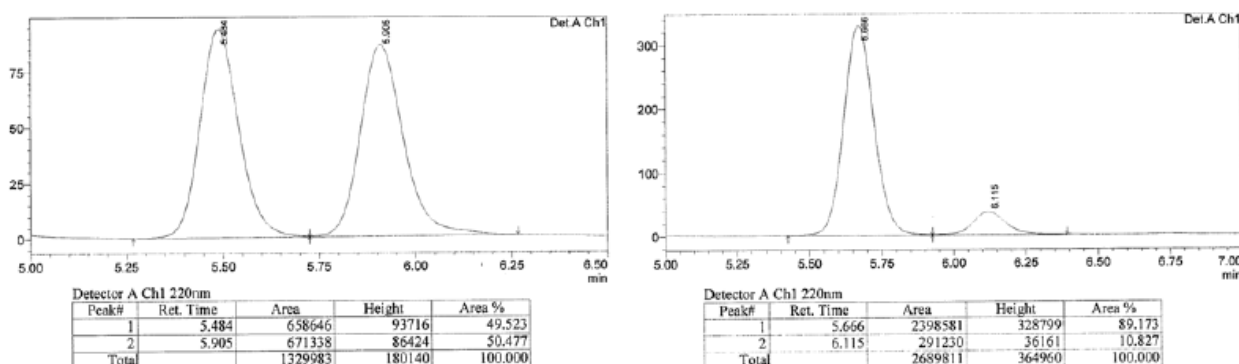

| Retention Time | Area   | Area % | Retention Time | Area   | Area % |
|----------------|--------|--------|----------------|--------|--------|
| 5.484          | 658646 | 49.523 | 5.666          | 328799 | 89.173 |
| 5.905          | 671338 | 50.477 | 6.115          | 36161  | 10.827 |

**(S)-4-Cyclohexyl-4-methylhexan-2-one (6b):** IR (neat): 2960 (m), 2924 (s), 2880 (w), 1708 (s), 1449 (m), 1417 (w), 1378 (w), 1355 (m), 1270 (w), 1207 (w), 1183 (w), 1148 (w), 1036 (w), 1007 (w), 965 (w), 933 (w), 894 (w), 847 (w), 795 (w), 773 (w), 641 (w), 572 (w), 535 (w), 504 (w)  $\text{cm}^{-1}$ ;  $^1\text{H}$  NMR ( $\text{CDCl}_3$ , 400 MHz):  $\delta$  2.35 (2H, ABq,  $\Delta\delta_{\text{AB}} = 0.17$ ,  $J_{\text{AB}} = 14.7$  Hz), 2.12 (3H, s), 1.77–1.64 (5H, m), 1.43 (2H, q,  $J = 7.6$  Hz), 1.36–0.88 (9H, m), 0.78 (3H, t);  $^{13}\text{C}$  NMR ( $\text{CDCl}_3$ , 100 MHz):  $\delta$  209.8, 49.1, 44.2, 38.6, 32.7, 29.1, 27.2, 27.1, 26.9, 21.9, 8.1; HRMS ( $\text{ESI}^+$ ): Calcd for  $\text{C}_{13}\text{H}_{25}\text{O}_1$   $[\text{M}+\text{H}]^+$ : 197.1905; Found: 197.1896 specific rotation:  $[\alpha]_{\text{D}}^{20} -2.0$  ( $c = 0.37$ ,  $\text{CHCl}_3$ ) for an enantiomerically enriched sample of 99:1 er. Enantiomeric purity (97.5:2.5 er) was determined by GC analysis in comparison with authentic racemic material; Chiraldex GTA column, 80 °C, 15 psi.

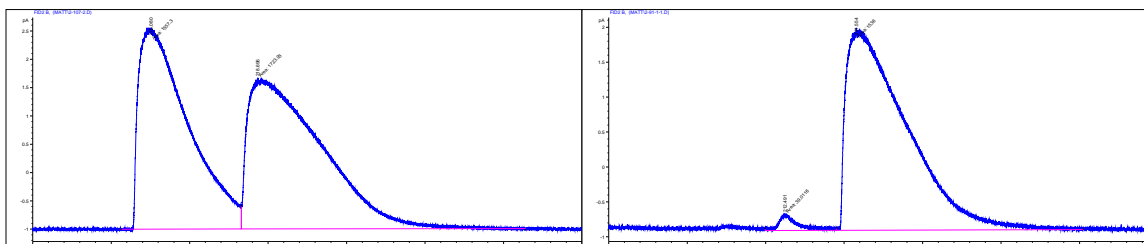

| Retention Time | Area   | Area % | Retention Time | Area | Area % |
|----------------|--------|--------|----------------|------|--------|
| 205.08         | 1557.3 | 47.461 | 212.491        | 39   | 2.477  |
| 218.696        | 1723.9 | 52.539 | 221.554        | 1536 | 97.523 |

**(S)-tert-Butyl-2-ethyl-methyl-4-oxopentanoate (6c):** IR (neat): 2974 (w), 2933 (w), 2882 (w), 1718 (s), 1459 (w), 1392 (w), 1366 (m), 1291 (w), 1252 (w), 1221 (s), 1162 (m), 1146 (m), 1134 (m), 1059 (w), 1040 (w), 1010 (w), 938 (w), 852 (w), 746 (w), 518 (w)  $\text{cm}^{-1}$ ;  $^1\text{H}$  NMR ( $\text{CDCl}_3$ , 400 MHz):  $\delta$  2.65 (2H, ABq,  $\Delta\delta_{\text{AB}} = 0.41$ ,  $J_{\text{AB}} = 17.6$  Hz), 2.11 (3H, s), 1.61–1.47 (2H, m), 1.42 (9H, s), 1.16 (3H, s), 0.84 (3H, t,  $J = 8.0$  Hz);  $^{13}\text{C}$  NMR ( $\text{CDCl}_3$ , 400 MHz):  $\delta$  206.5, 175.6, 80.0, 51.4, 44.3, 32.6, 30.6, 27.9, 21.0, 8.5; HRMS ( $\text{ESI}^+$ ): Calcd for  $\text{C}_{12}\text{H}_{23}\text{O}_3$   $[\text{M}+\text{H}]^+$ : 215.1647; Found: 215.1647; specific rotation:  $[\alpha]_{\text{D}}^{20} +22$  ( $c = 0.06$ ,  $\text{CHCl}_3$ ) for an enantiomerically enriched sample of 91:9 er. Enantiomeric purity (91:9 er) was determined by HPLC analysis in comparison with authentic racemic; Chiralcel AD(H), 99.8% hexanes, 0.2% *i*-PrOH, 0.5 mL/min, 220 nm.

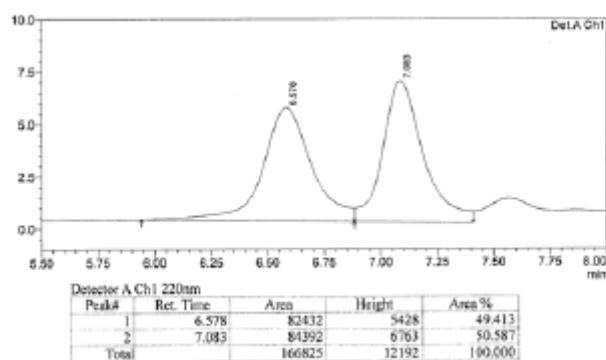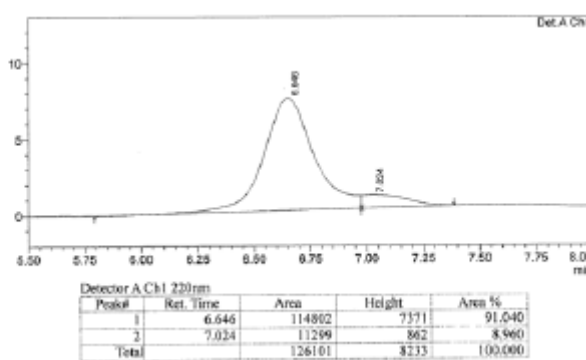

| Retention Time | Area  | Area % | Retention Time | Area   | Area % |
|----------------|-------|--------|----------------|--------|--------|
| 6.578          | 82432 | 49.413 | 6.646          | 114802 | 91.040 |
| 7.083          | 84392 | 50.587 | 7.024          | 11299  | 8.960  |

**(S)-4,6-Dimethyl-4-phenylheptan-2-one (7):** IR (neat): 3088 (w), 3058 (w), 3026 (w), 2953 (m), 2926 (w), 2869 (w), 1703 (s), 1601 (w), 1581 (w), 1497 (w), 1466 (w), 1446 (w), 1383 (w), 1356 (m), 1306 (w), 1201 (w), 1166 (w), 1134 (w), 1118 (w), 1073 (w), 1031 (w), 966 (w), 925 (w), 841 (w), 765 (m), 700 (s), 638 (w), 571 (w), 552 (w)  $\text{cm}^{-1}$ ;  $^1\text{H}$  NMR ( $\text{CDCl}_3$ , 400 MHz):  $\delta$  7.36–7.28 (4H, m), 7.21–7.16 (1H, m), 2.72 (2H, ABq,  $\Delta\delta_{\text{AB}} = 0.35$ ,  $J_{\text{AB}} = 14.0$  Hz), 1.75 (3H, s), 1.69 (2H, ABX,  $\Delta\delta_{\text{AB}} = 0.19$ ,  $J_{\text{AB}} = 13.6$  Hz,  $J_{\text{AX}} = 5.6$  Hz), 1.58–1.44 (1H, m), 1.48 (3H, s), 0.83 (3H, d,  $J = 6.8$  Hz), 0.58 (3H, d,  $J = 6.8$  Hz);  $^{13}\text{C}$  NMR ( $\text{CDCl}_3$ , 400 MHz):  $\delta$  208.3, 146.8, 128.3, 126.4, 126.1, 57.3, 52.2, 41.0, 32.2, 25.3, 24.7, 23.6, 23.8; HRMS ( $\text{ESI}^+$ ): Calcd for  $\text{C}_{15}\text{H}_{26}\text{O}_1\text{N}_1$   $[\text{M}+\text{NH}_4]^+$ : 236.2014; Found: 236.2012; specific rotation:  $[\alpha]_{\text{D}}^{20} +83.5$  ( $c = 1.10$ ,  $\text{CHCl}_3$ ) for an enantiomerically enriched sample of 98:2 er. Enantiomeric purity (98:2 er) was determined by GC analysis in comparison with authentic racemic; Chiraldex B/DM, 85 °C, 15 psi.



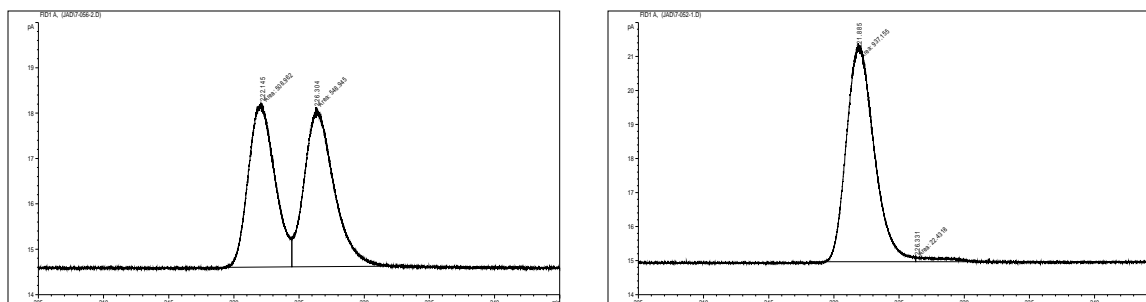

| Retention Time | Area  | Area % | Retention Time | Area  | Area%  |
|----------------|-------|--------|----------------|-------|--------|
| 222.145        | 509.0 | 48.11  | 221.885        | 937.2 | 97.662 |
| 226.304        | 548.9 | 51.890 | 226.331        | 22.4  | 2.338  |

### ■ Proof of Absolute Stereochemistry: *Aryl Additions*

■ **Representative Procedure for Oxidation of Methyl Ketone to Carboxylic Acid-2 step:** A flame-dried 4 mL vial equipped with stirbar was charged with 2,2,6,6-tetramethyl piperidine (17.2  $\mu$ L, 0.101 mmol) and thf (0.22 mL) by syringe under  $N_2$ . The vial was allowed to cool to  $-78^\circ C$  and a solution of *n*BuLi (54.5  $\mu$ L, 0.0872 mmol, 1.6 M), was added. The resulting mixture was allowed to warm to  $22^\circ C$  and stir for 5 minutes, and cooled again to  $-78^\circ C$ . (*R*)-4-Phenyl-4-(thiophen-3-yl)pentan-2-one (14.2 mg, 0.0581 mmol) dissolved in thf (0.2 mL) was added to the mixture, which was allowed to stir for 30 min and  $-78^\circ C$ . Trimethylsilyltriflate (31.9  $\mu$ L, 0.176 mmol) was added by syringe and the mixture was allowed to stir for an additional 15 minutes at  $-78^\circ C$ . A saturated solution of  $NaHCO_3$  (1.0 mL) was added and the mixture was allowed to slowly warm to  $22^\circ C$ , at which time the solution was diluted with  $H_2O$  (1 mL) and  $Et_2O$  (1 mL). The layers were separated and the aqueous layer was extracted with  $Et_2O$  (3 x 1 mL) and the combined organic layers were dried by  $Na_2SO_4$ , filtered, and concentrated in a 20 mL vial to yield a clear oil. The oil was dissolved in  $CH_2Cl_2$  (2.5 mL) and the solution was allowed to cool to  $-78^\circ C$ , then ozone was bubbled through by a pipet until the reaction turned blue ( $\sim 10$  s, longer reaction times afford products from ozonolysis of the thiophene ring) at which time the pipet was removed and a stirbar was added to the vial. Dimethylsulfide (90  $\mu$ L) was added by syringe and the solution was allowed to stir and slowly warm to  $22^\circ C$  over 30 min. The mixture was filtered through a sodium sulfate plug and concentrated to afford a yellow oily solid which was purified by column chromatography (100%  $CH_2Cl_2$  to 15:1  $CH_2Cl_2/EtOAc$ ) to obtain (*R*)-3-Phenyl-3-(thiophen-3-yl)butanoic acid as a white solid (13.5 mg, 0.0552 mmol, 95% yield). **(*R*)-3-Phenyl-3-(thiophen-3-yl)butanoic acid (4):** IR (neat): 3104 (w), 3085 (w), 3058 (w), 3057 (br), 3024 (w), 2972 (w), 2934 (w), 2554 (br), 1781 (w), 1707 (s), 1600 (w), 1536 (w), 1495 (w), 1445 (w), 1412 (w), 1374 (w), 1310 (w), 1247 (w), 1218 (m), 1150 (m), 1085 (w), 1030 (w), 939 (w), 910 (w), 864 (w), 835 (w), 777 (m), 700 (s), 663 (m), 601 (w), 555 (w)  $cm^{-1}$ ;  $^1H$  NMR ( $CDCl_3$ , 400 MHz):  $\delta$  9.73 (1H, br s), 7.39–7.33 (1H, m), 7.30–7.27 (1H, m), 7.24–7.17 (4H, m), 7.04–7.03 (1H, m), 6.79 (1H, dd,  $J = 5.2, 1.2$  Hz), 3.12 (2H, ABq,  $\Delta\delta_{AB} = 0.05, J_{AB} = 14.4$  Hz), 1.87 (3H, s);  $^{13}C$  NMR ( $CDCl_3$ , 100 MHz):  $\delta$  176.1, 149.3, 147.4, 128.3, 127.6, 126.6, 126.5, 125.7, 120.3,

46.4, 43.5, 28.0; HRMS (ESI<sup>+</sup>): Calcd for C<sub>14</sub>H<sub>15</sub>O<sub>2</sub>S<sub>1</sub> [M+H]<sup>+</sup>: 247.0793; Found: 247.0801; specific rotation:  $[\alpha]_D^{20} +3.0$  (c = 0.43) for an enantiomerically enriched sample of 99:1 er. All other products were assigned by analogy.

■ **Proof of Absolute Stereochemistry: Alkyl Additions**

■ **Representative Procedure for Oxidation of Methyl Ketone to Carboxylic Acid-1 step:** A 20 mL vial equipped with stirbar was charged with (*S*)-4-methyl-4-phenylhexan-2-one (9.5 mg, 0.50 mmol). NaOCl (1.7 mL, 0.25 mmol) and NaOH (aq, 2M, 20.  $\mu$ L, 0.055 mmol) were added by syringe at 22°C. The resulting solution was allowed to stir and warm to 70 °C (oil bath) and stir for 12 hours. The reaction was allowed to cool to 22 °C and acetone (0.1 mL) was added by syringe (additional acetone was added until the reaction tested negative for peroxides by starch paper). The reaction was allowed to cool to 0 °C and 12M HCl was added dropwise until the solution was strongly acidic by litmus paper test. CH<sub>2</sub>Cl<sub>2</sub> (2 mL) was added and the layers were separated. The aqueous layer was extracted with CH<sub>2</sub>Cl<sub>2</sub> (3 x 2 mL). The combined organic layers were dried with Na<sub>2</sub>SO<sub>4</sub>, filtered, and concentrated to yield a yellow oil (62% conv.) which was purified by column chromatography (100% CH<sub>2</sub>Cl<sub>2</sub>) to afford (*S*)-3-methyl-3-phenylpentanoic acid as a white solid (5.8 mg, 0.030 mmol, 60% yield). **(*S*)-3-Methyl-3-phenylpentanoic acid (8):** The analytical data are fully consistent with those reported previously.<sup>7</sup> IR (neat): 3090 (w), 3059 (w), 3028 (w), 2968 (w), 2927 (w), 2880 (w), 2567 (br), 1704 (s), 1602 (w), 1497 (w), 1446 (w), 1409 (w), 1382 (w), 1288 (w), 1234 (w), 1132 (w), 1107 (w), 1032 (w), 1007 (w), 934 (w), 761 (w), 699 (w), 632 (m) cm<sup>-1</sup>; <sup>1</sup>H NMR (CDCl<sub>3</sub>, 400 MHz):  $\delta$  7.33–7.30 (4H, m), 7.21–7.18 (1H, m), 2.67 (2H, ABq,  $\Delta\delta_{AB} = 0.11$ ,  $J_{AB} = 14.4$  Hz), 1.78 (2H, ABX<sub>3</sub>,  $\Delta\delta_{AB} = 0.094$ ,  $\Delta\delta_{AX} = 2.46$ ,  $J_{AB} = 14.4$ ,  $J_{AX} = 7.2$  Hz), 1.47 (3H, s), 0.68 (3H, t,  $J = 7.2$  Hz); <sup>13</sup>C NMR (CDCl<sub>3</sub>, 100 MHz):  $\delta$  176.1, 149.3, 147.4, 128.3, 127.6, 126.6, 126.5, 125.7, 120.3, 46.4, 43.5, 28.0; HRMS (ESI<sup>+</sup>): Calcd for C<sub>12</sub>H<sub>17</sub>O<sub>2</sub> [M+H]<sup>+</sup>: 193.1229; Found: 193.1226; specific rotation:  $[\alpha]_D^{20} +5.1$  (c = 0.38 CHCl<sub>3</sub>) for an enantiomerically enriched sample of >99:1 er. **Literature Precedence:** *R*-isomer  $[\alpha]_D^{20} -8.8$  (c = 0.24 CHCl<sub>3</sub>) for an enantiomerically enriched sample of >99:1 er. Other products were assigned by inference.

■ **<sup>1</sup>H NMR Spectra of New Compounds:**

[7] E. Fillion, A. Wilsily, *J. Am. Chem. Soc.* **2006**, *128*, 2774–2775.

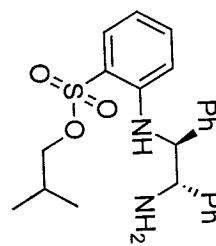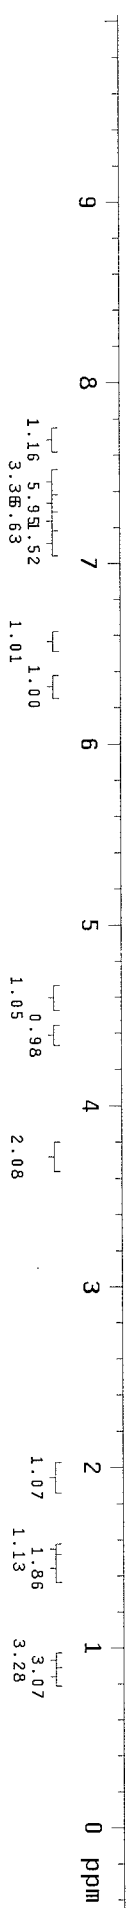

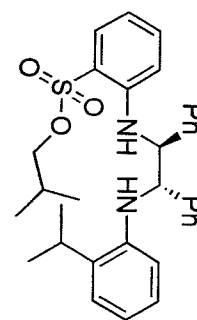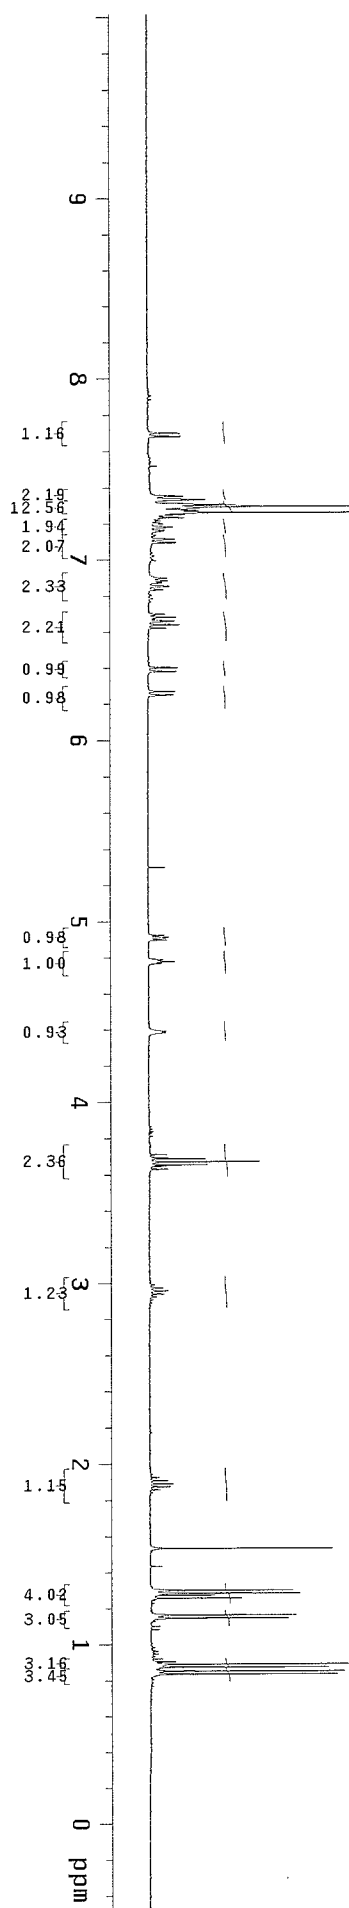

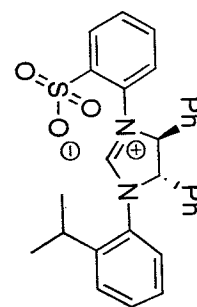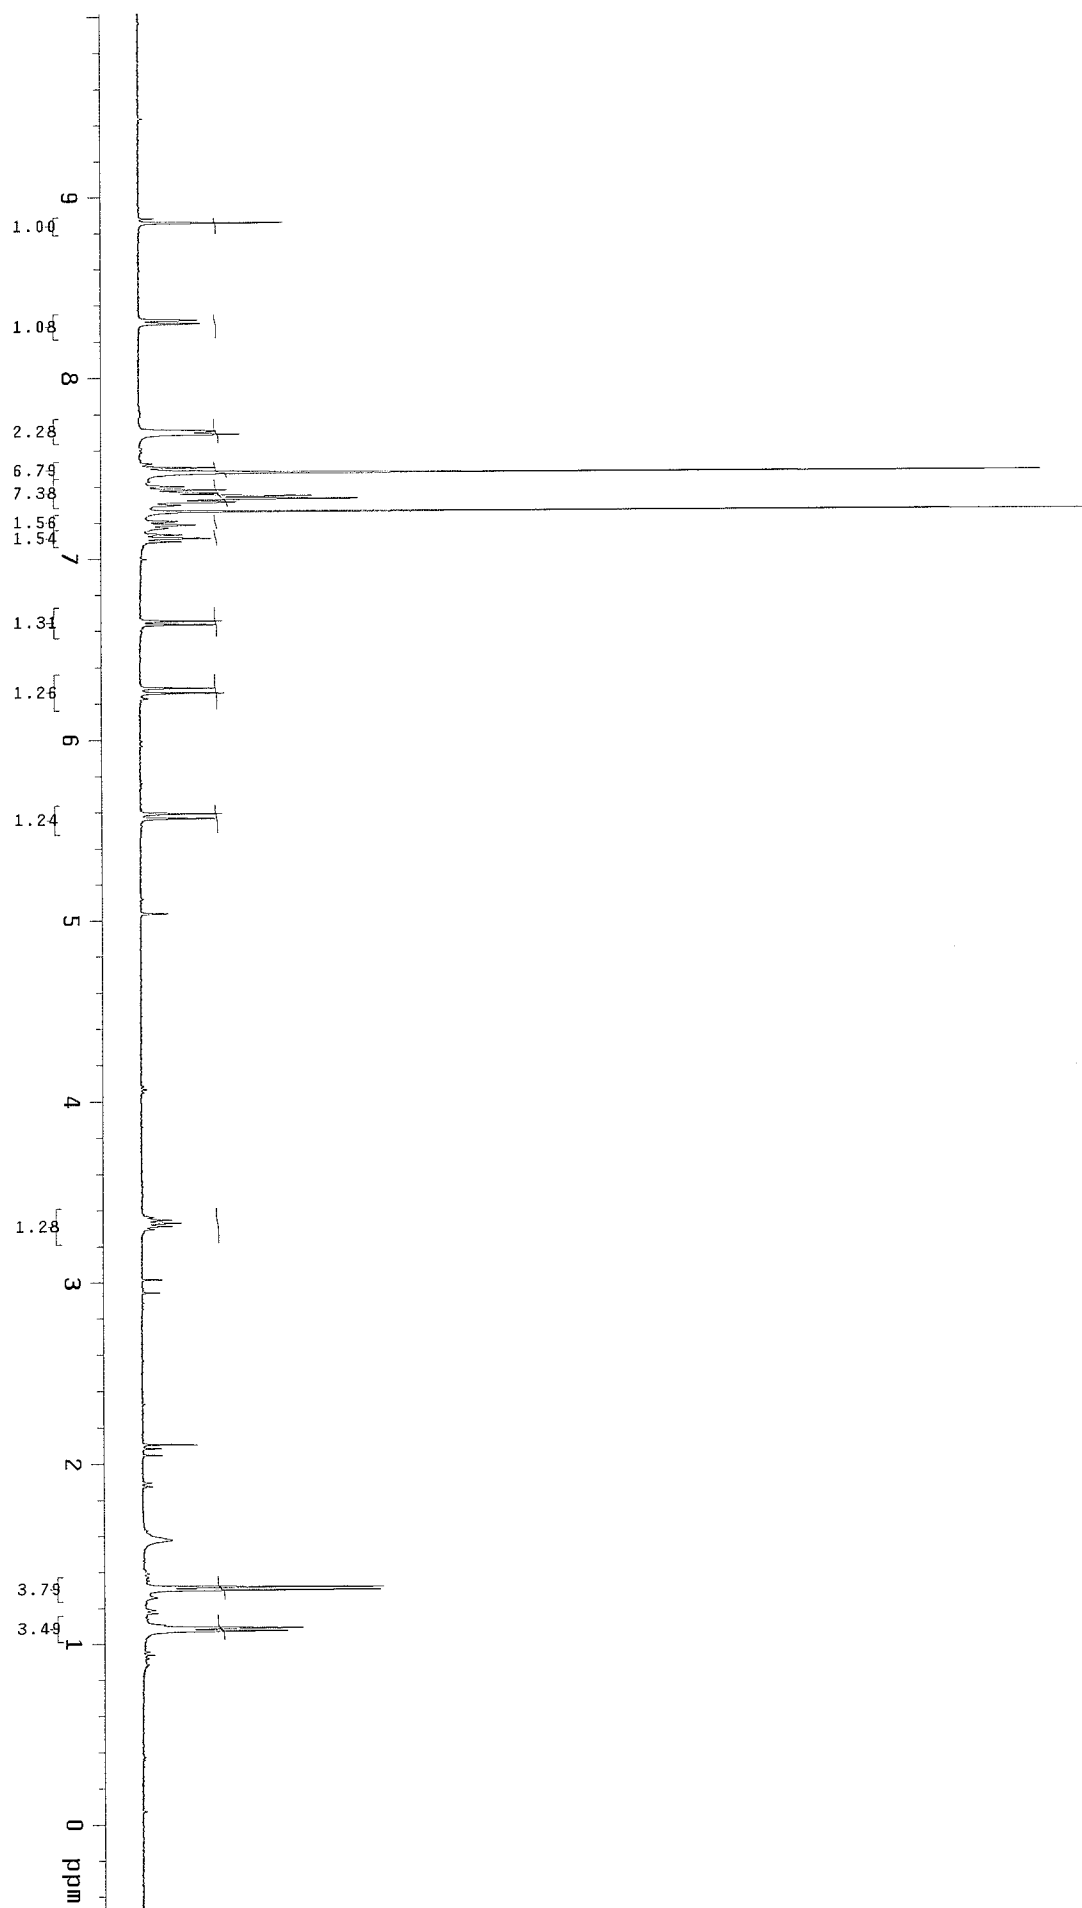

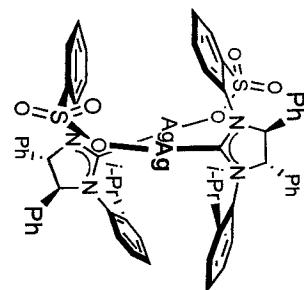

**1**

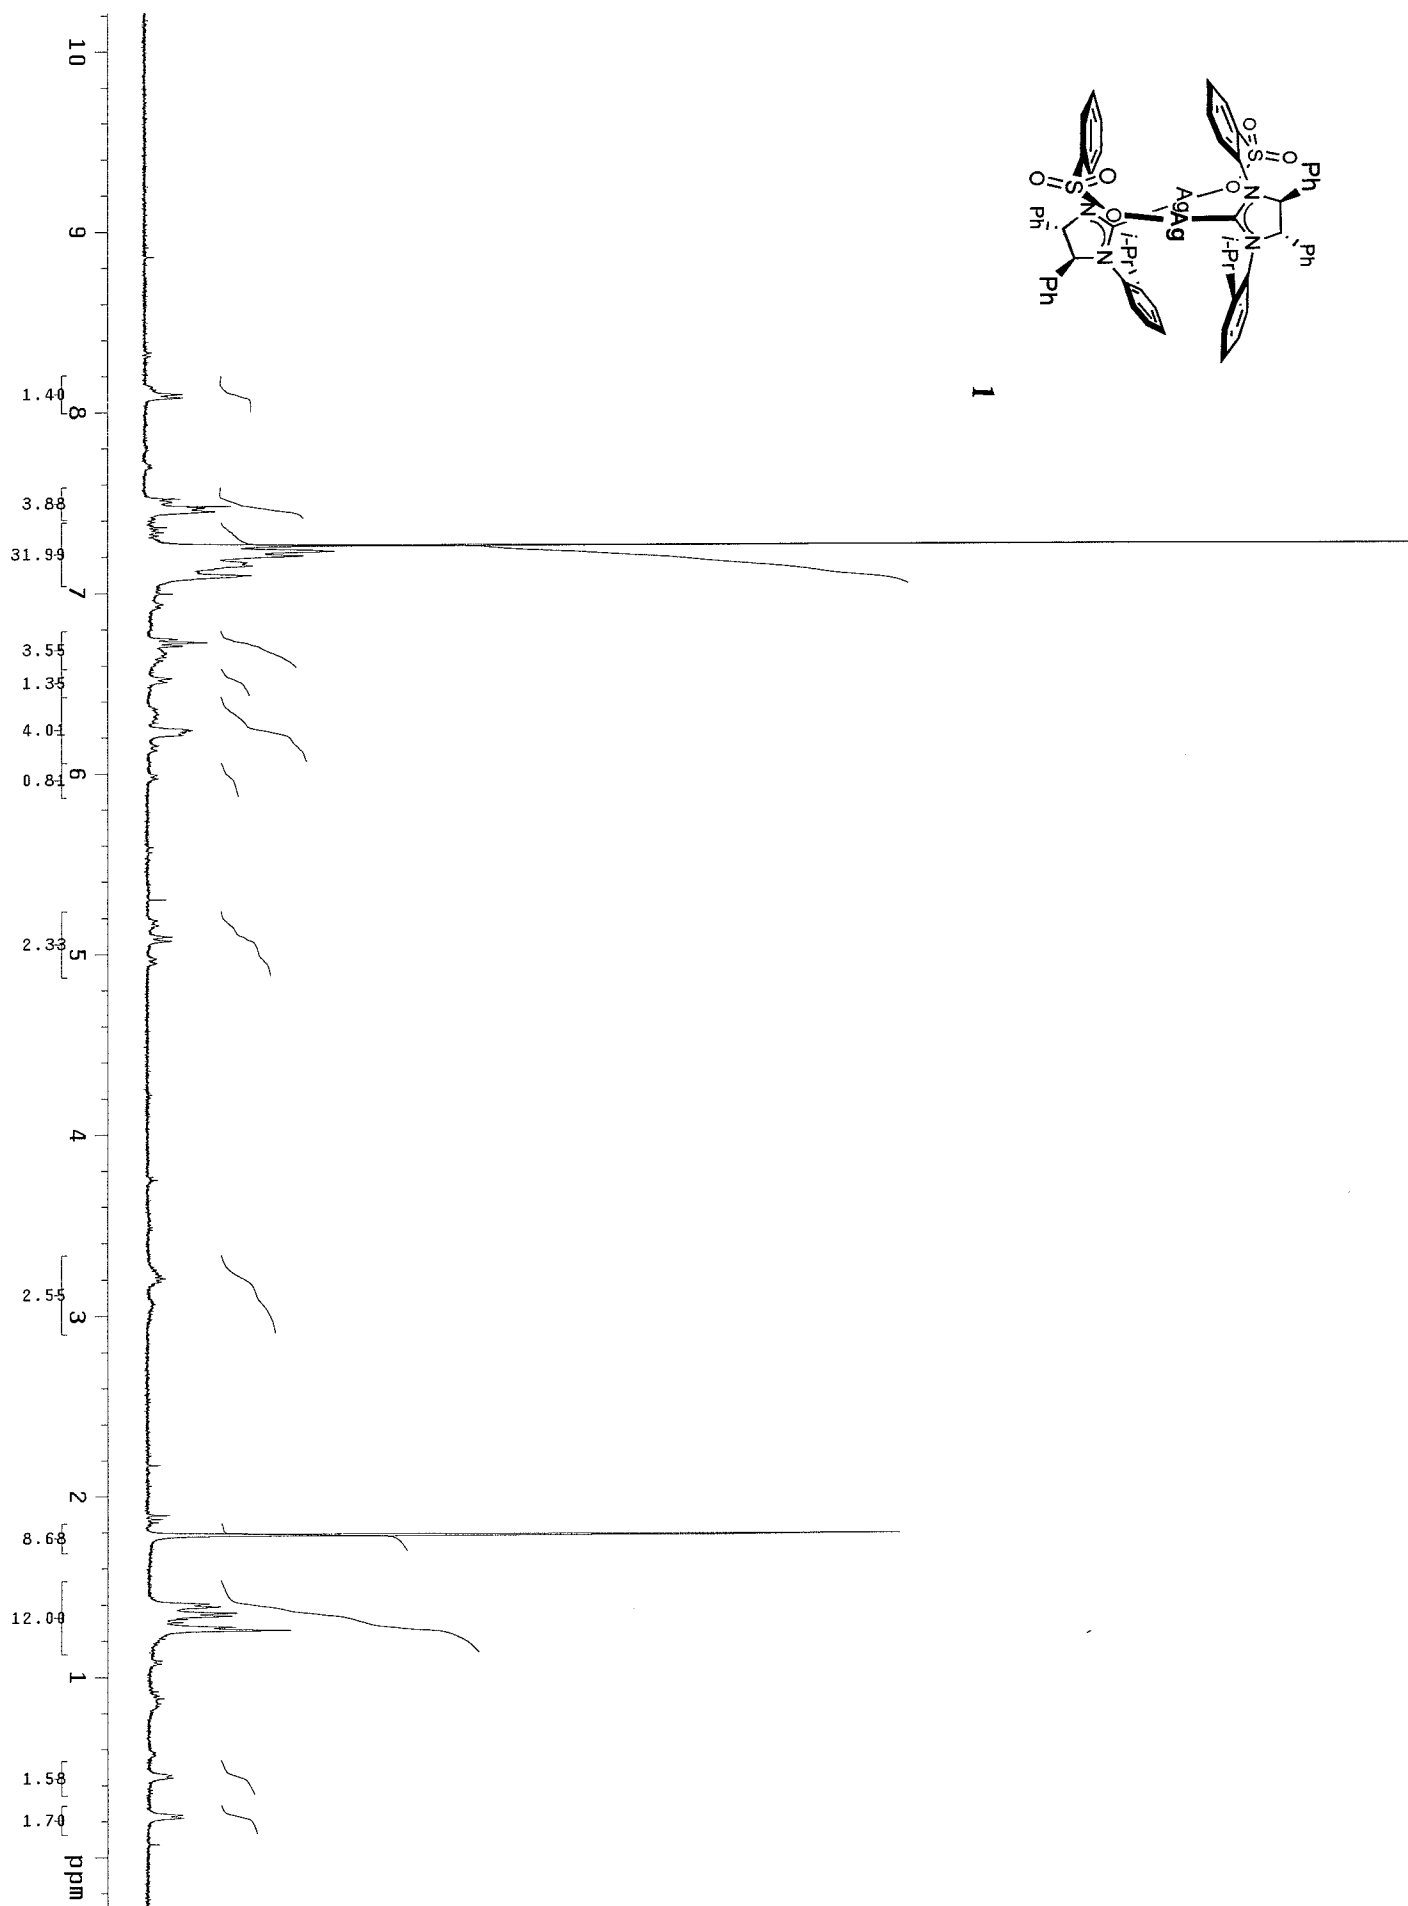

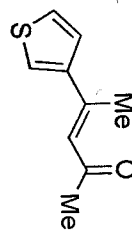

**2a**

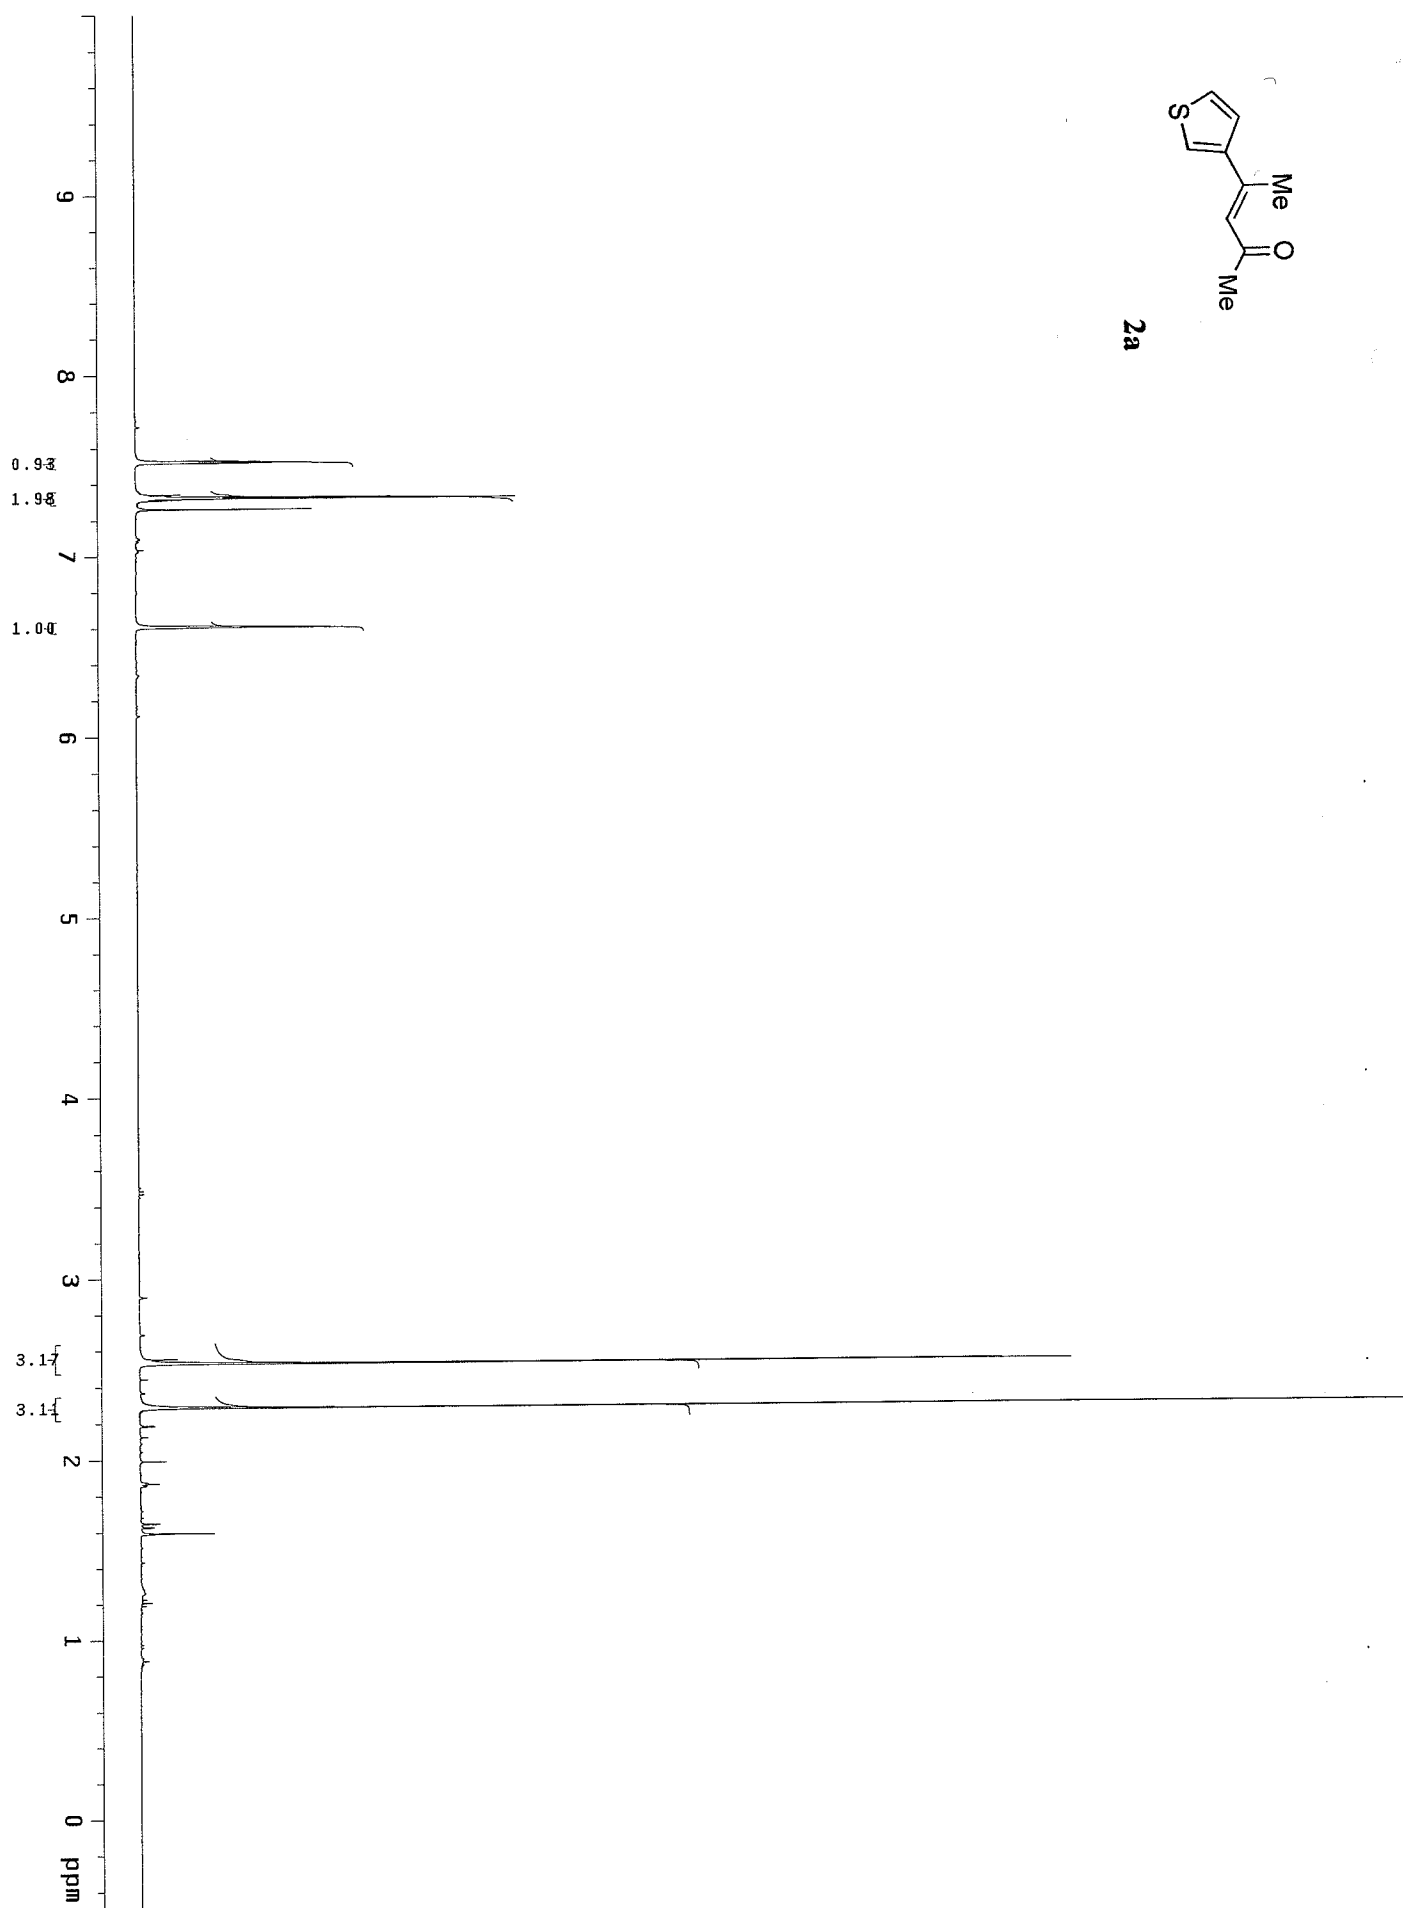

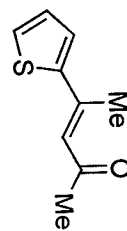

2c

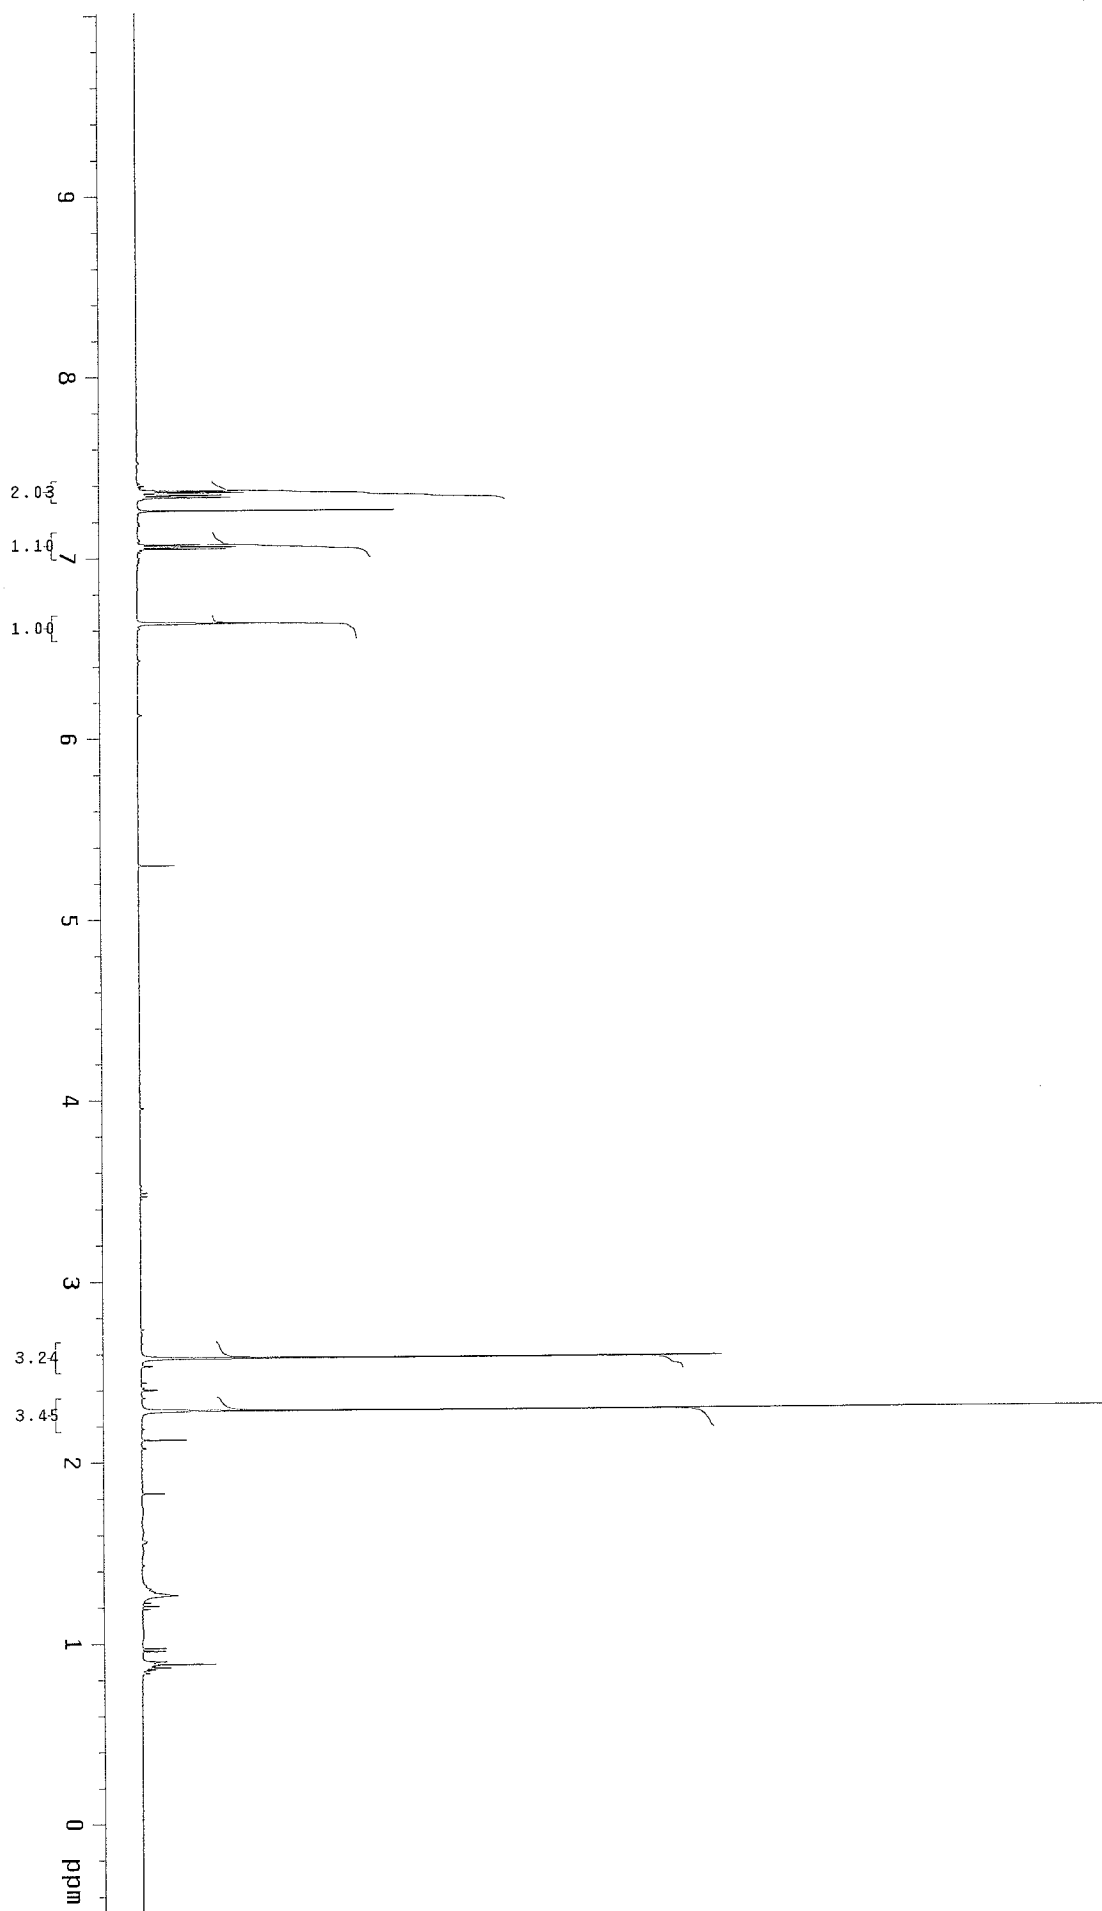



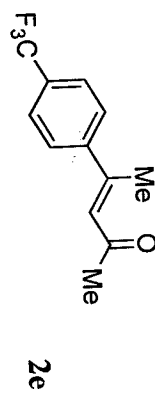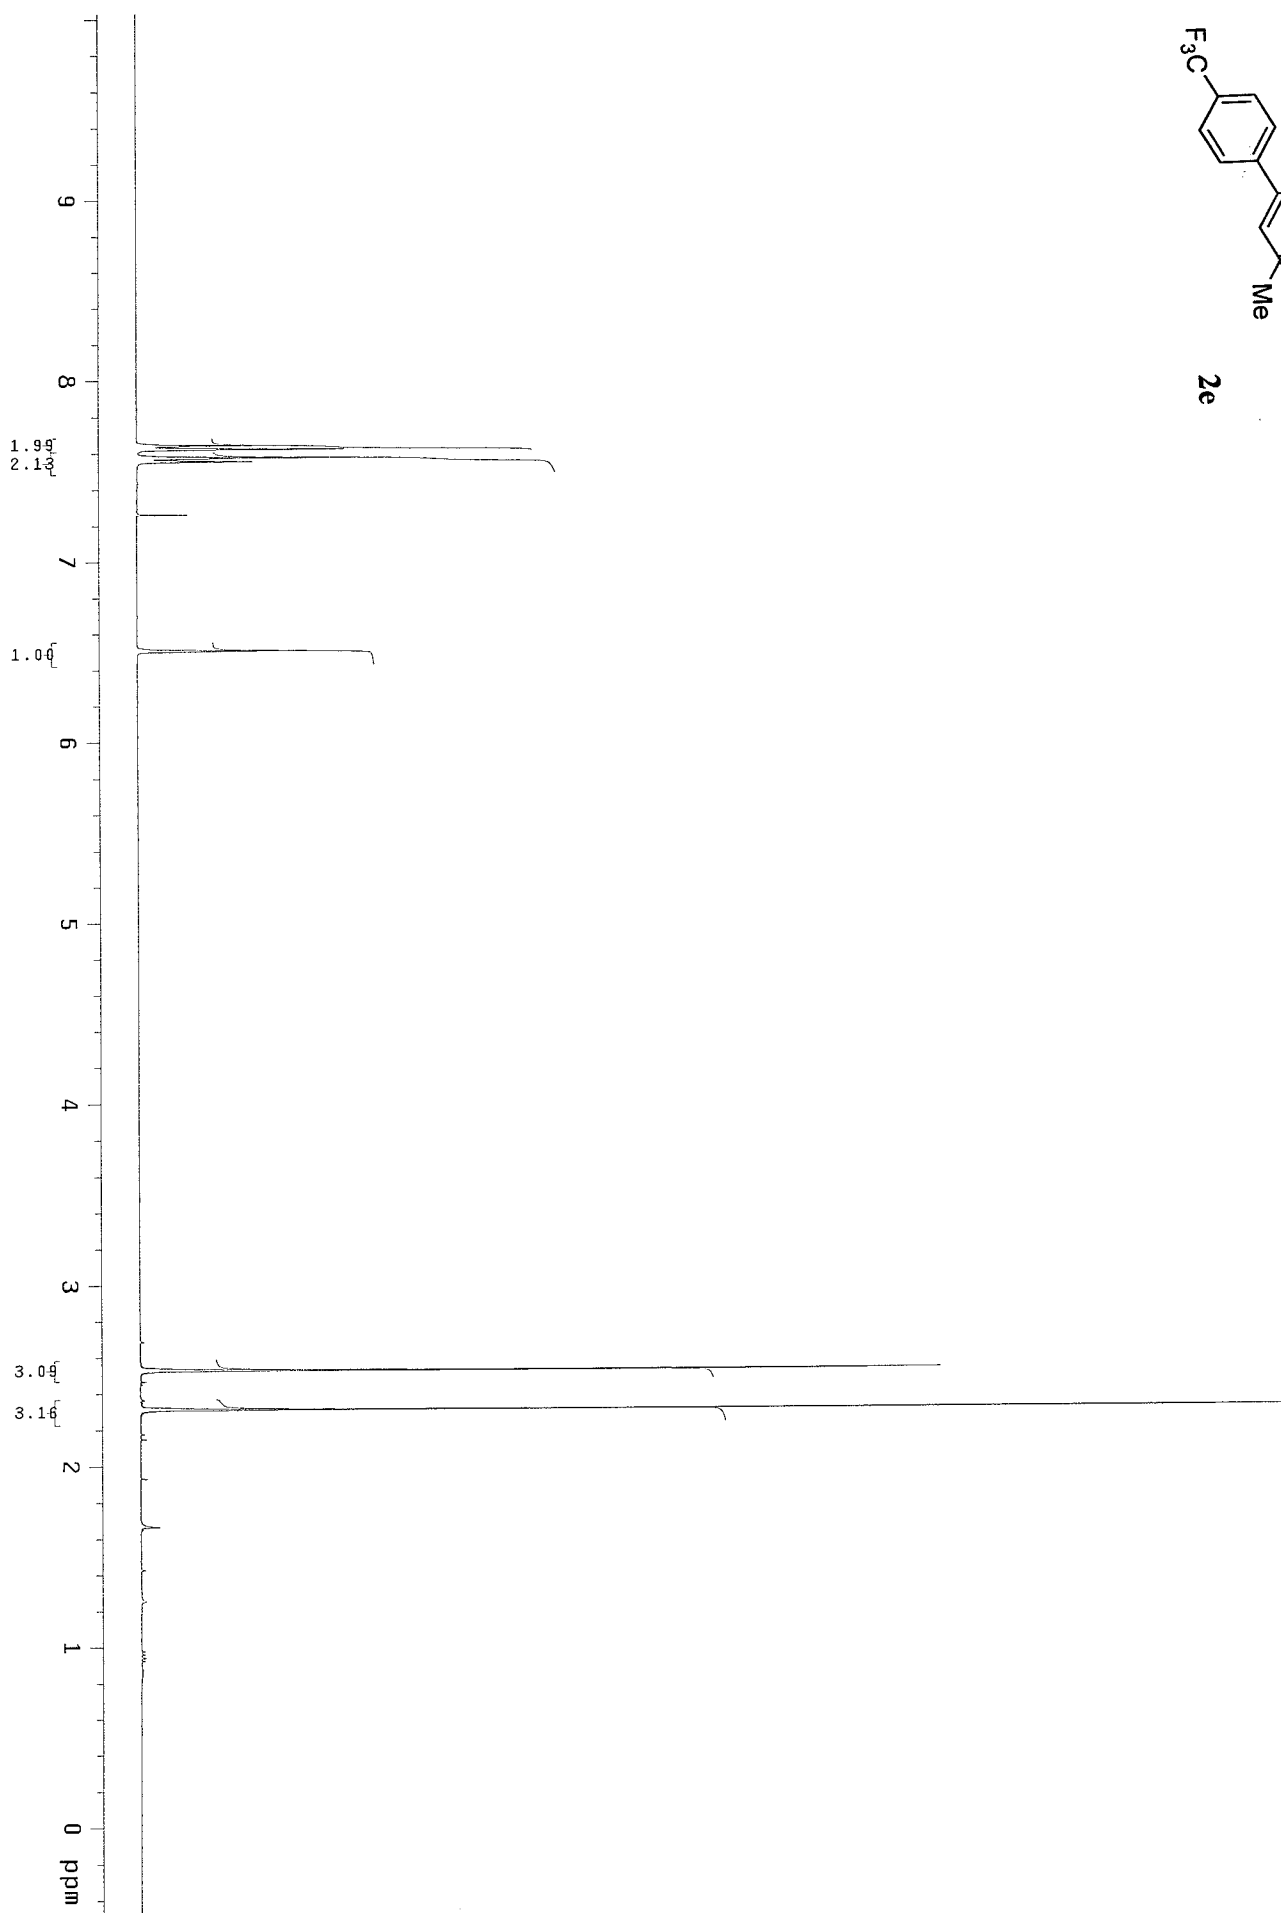

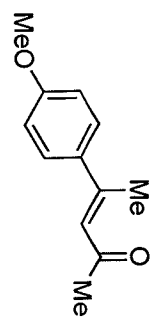

**2f**

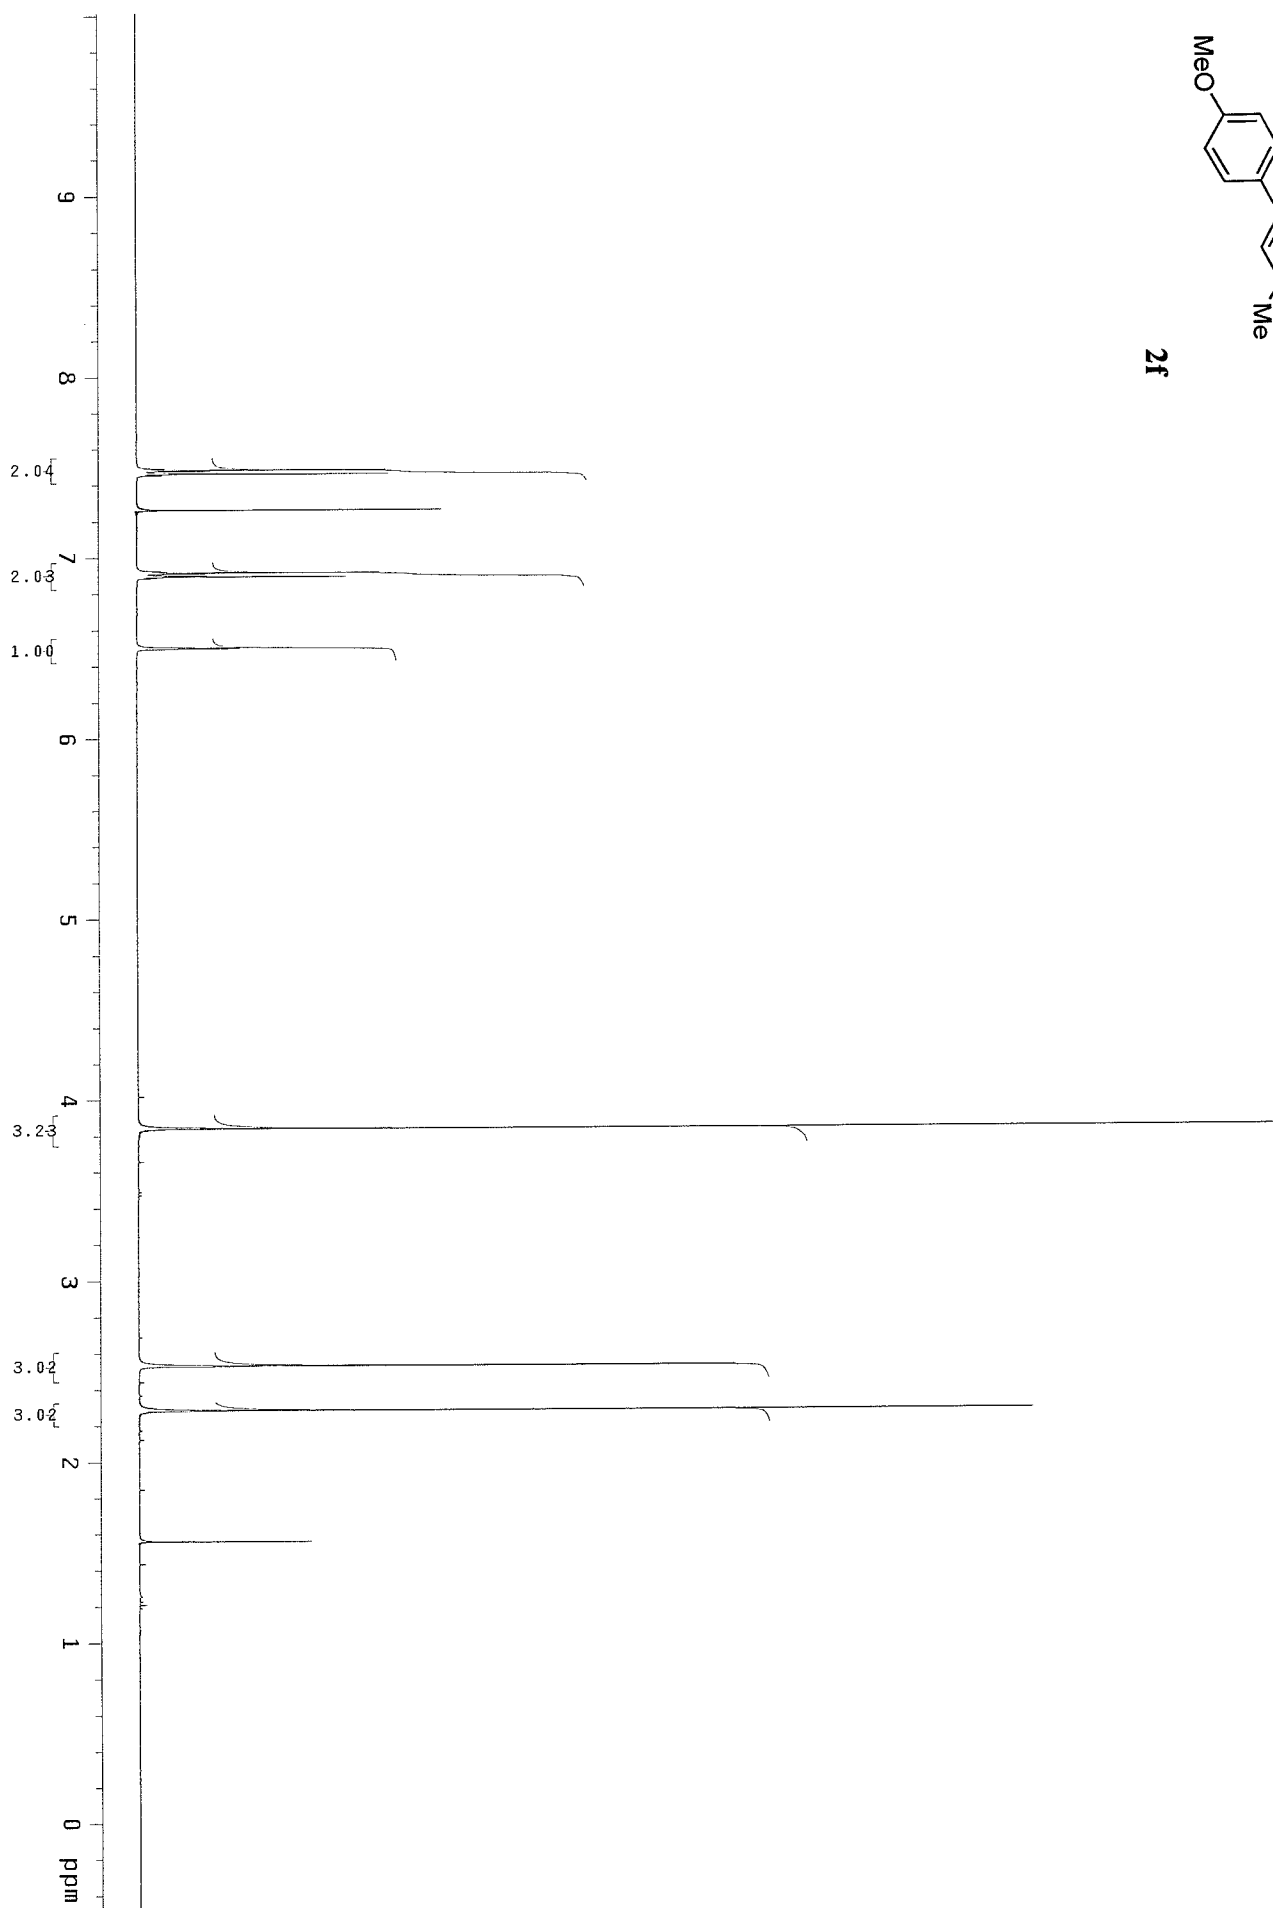

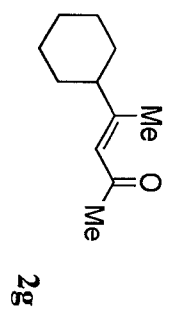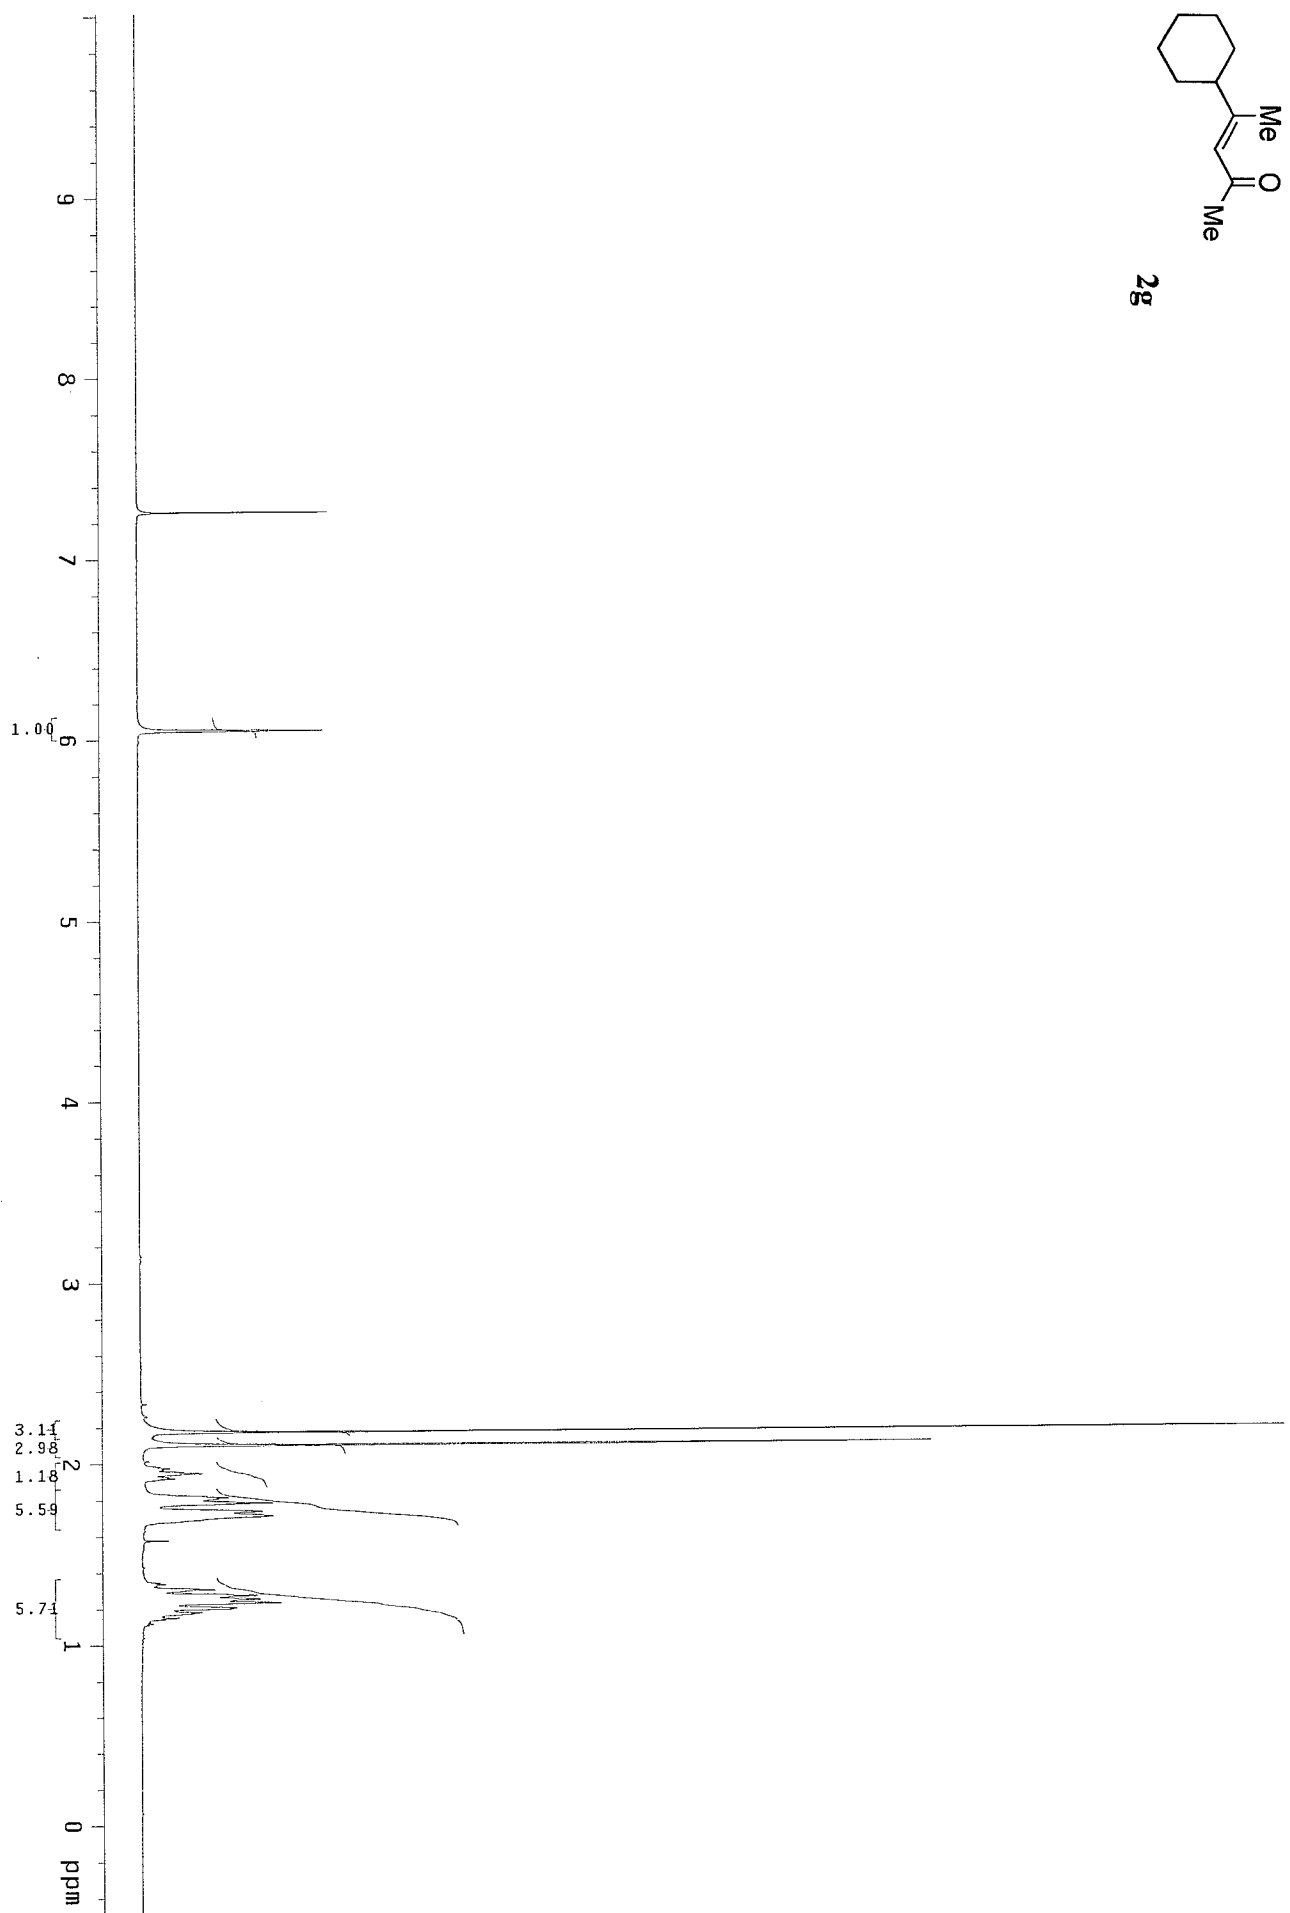

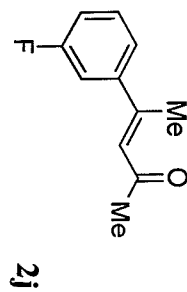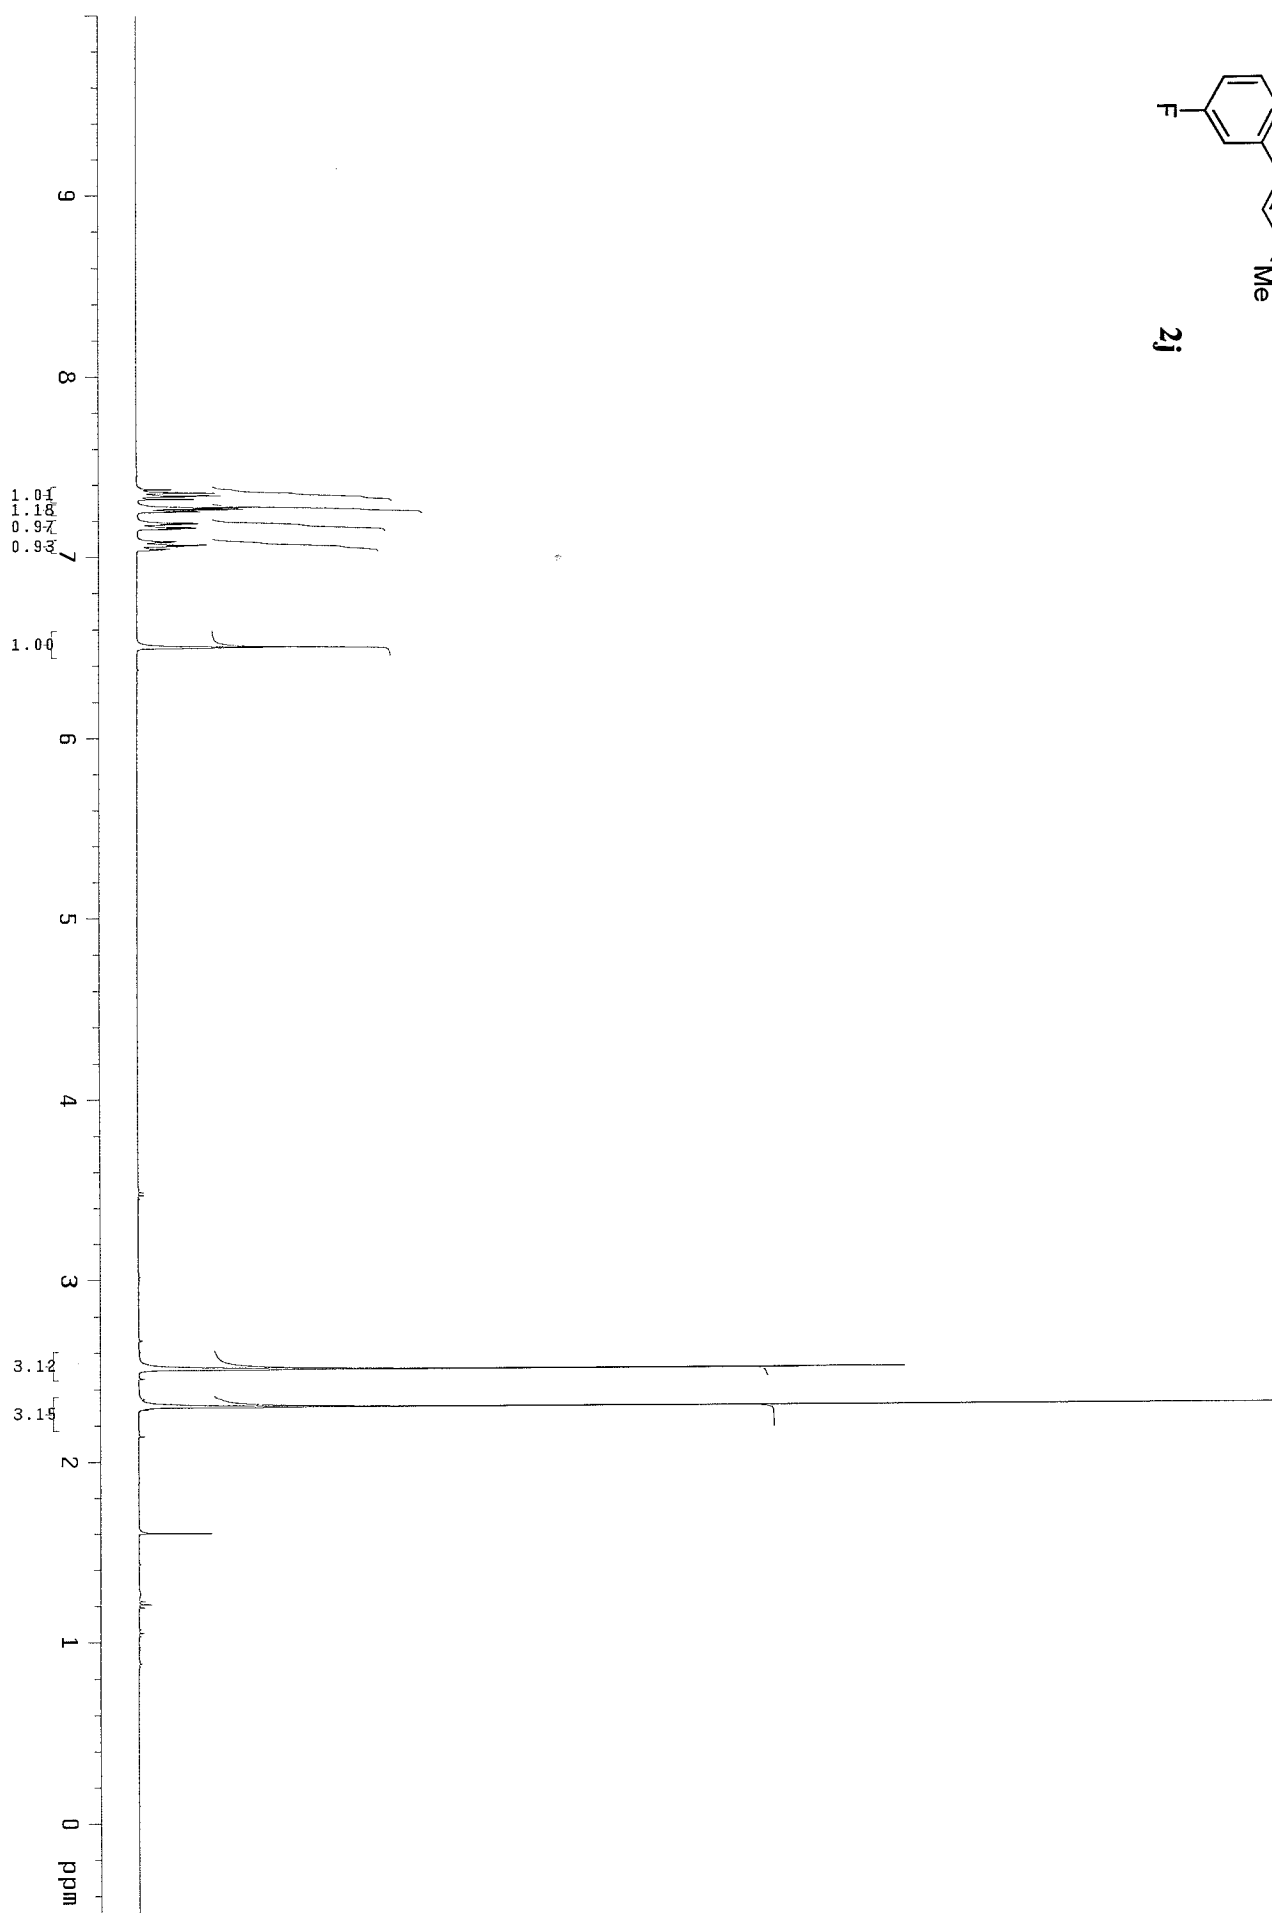

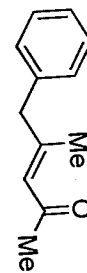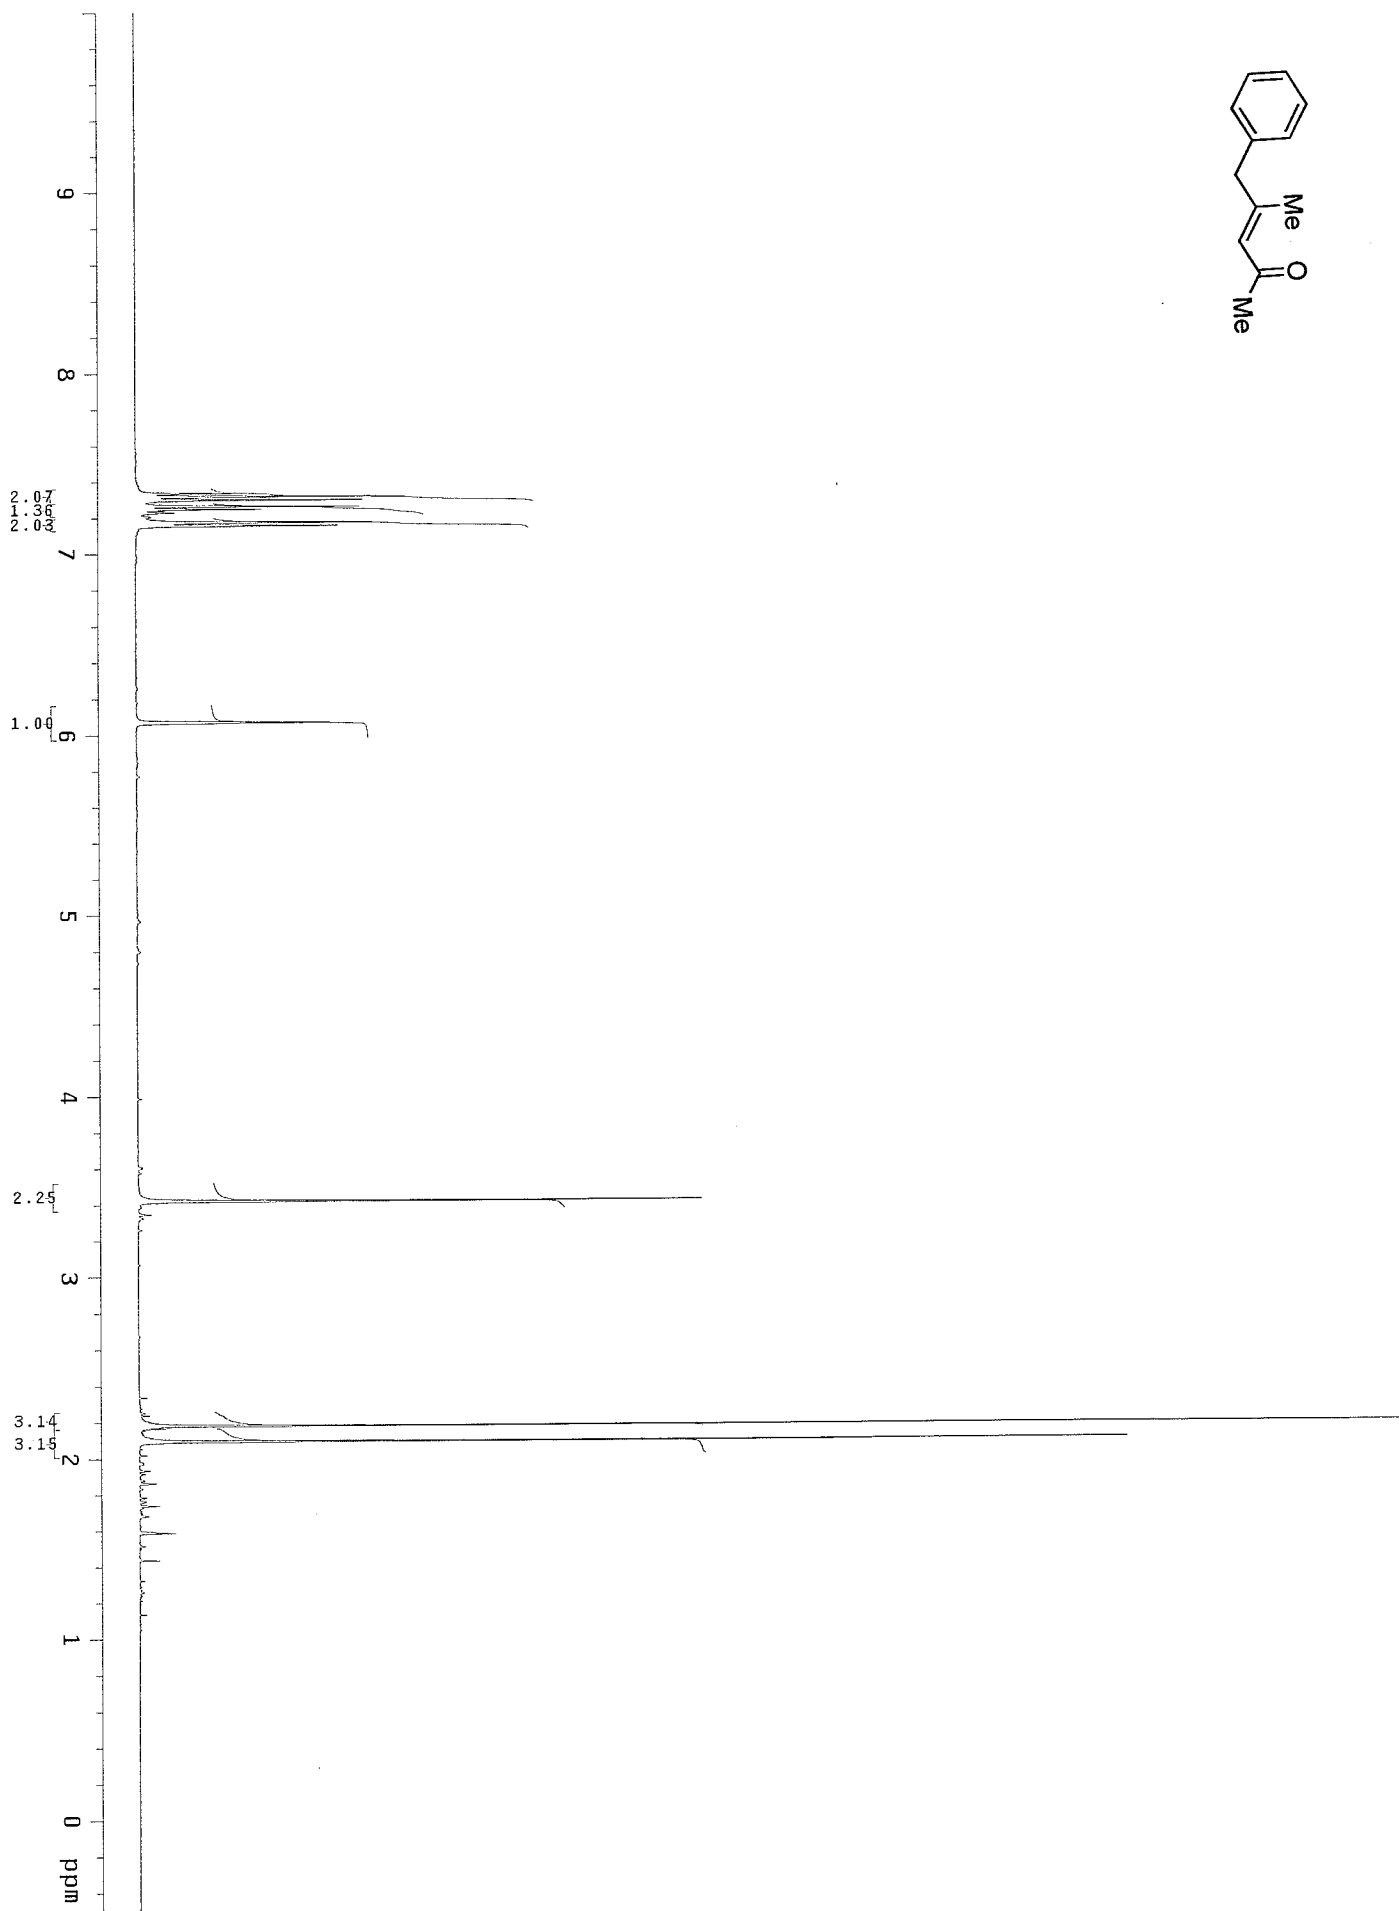

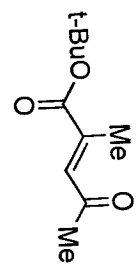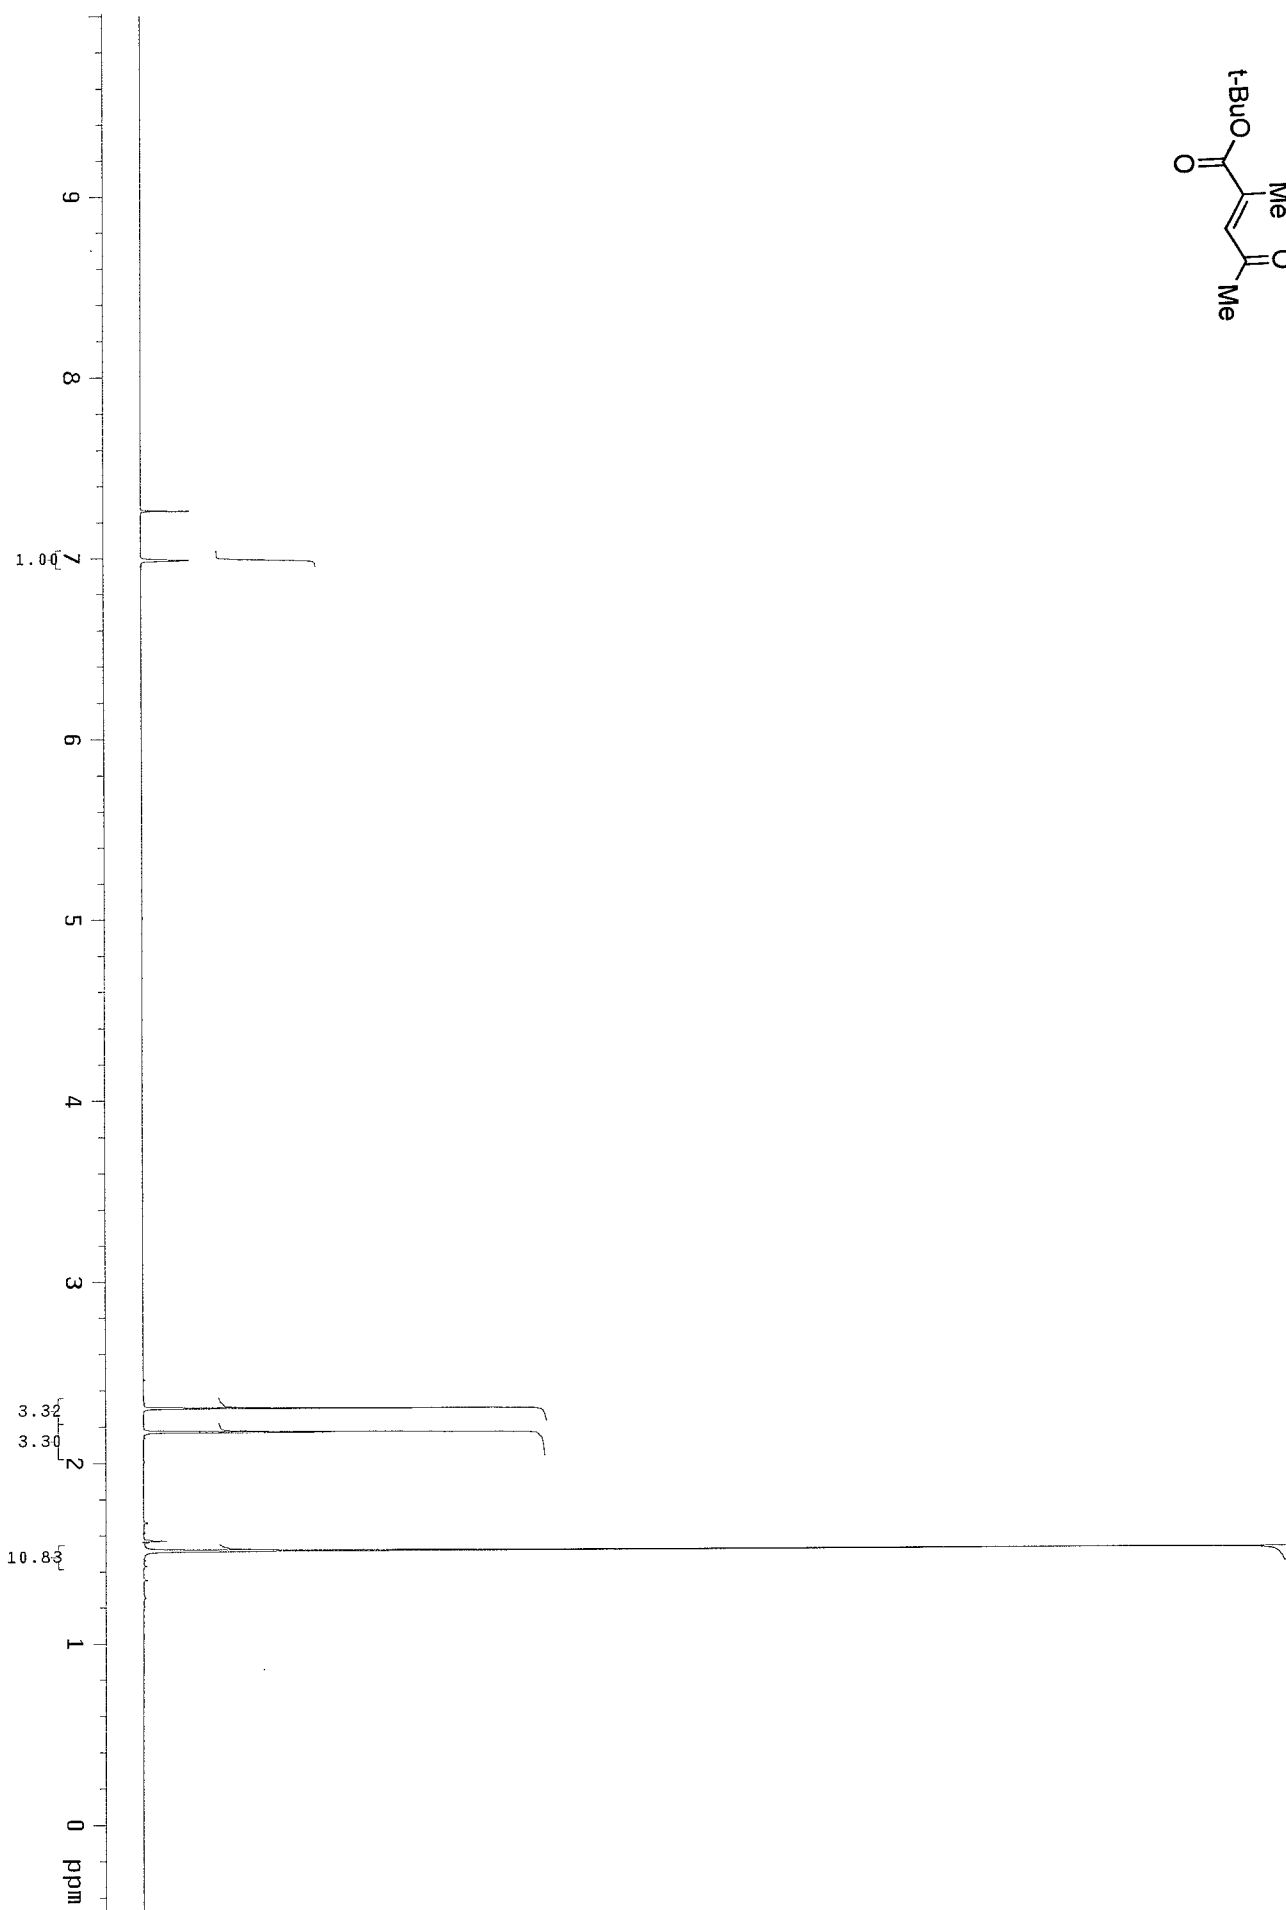

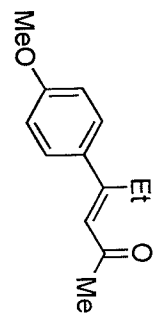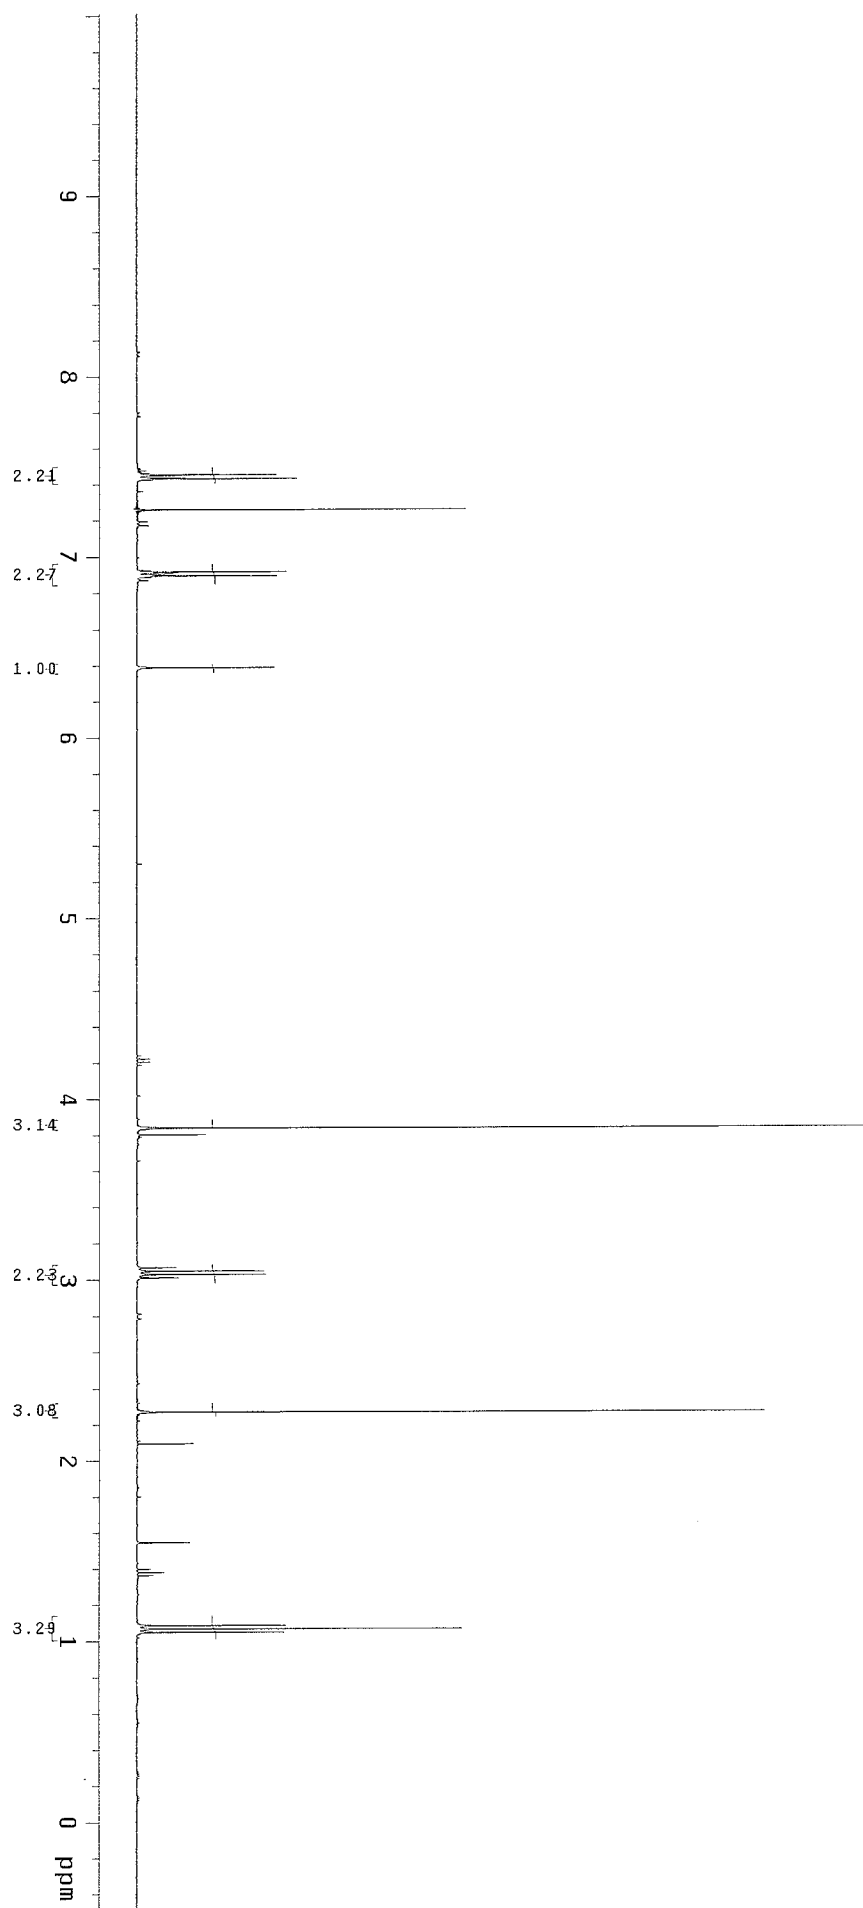

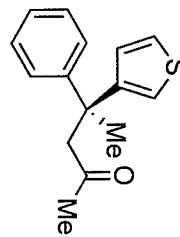

S-3a

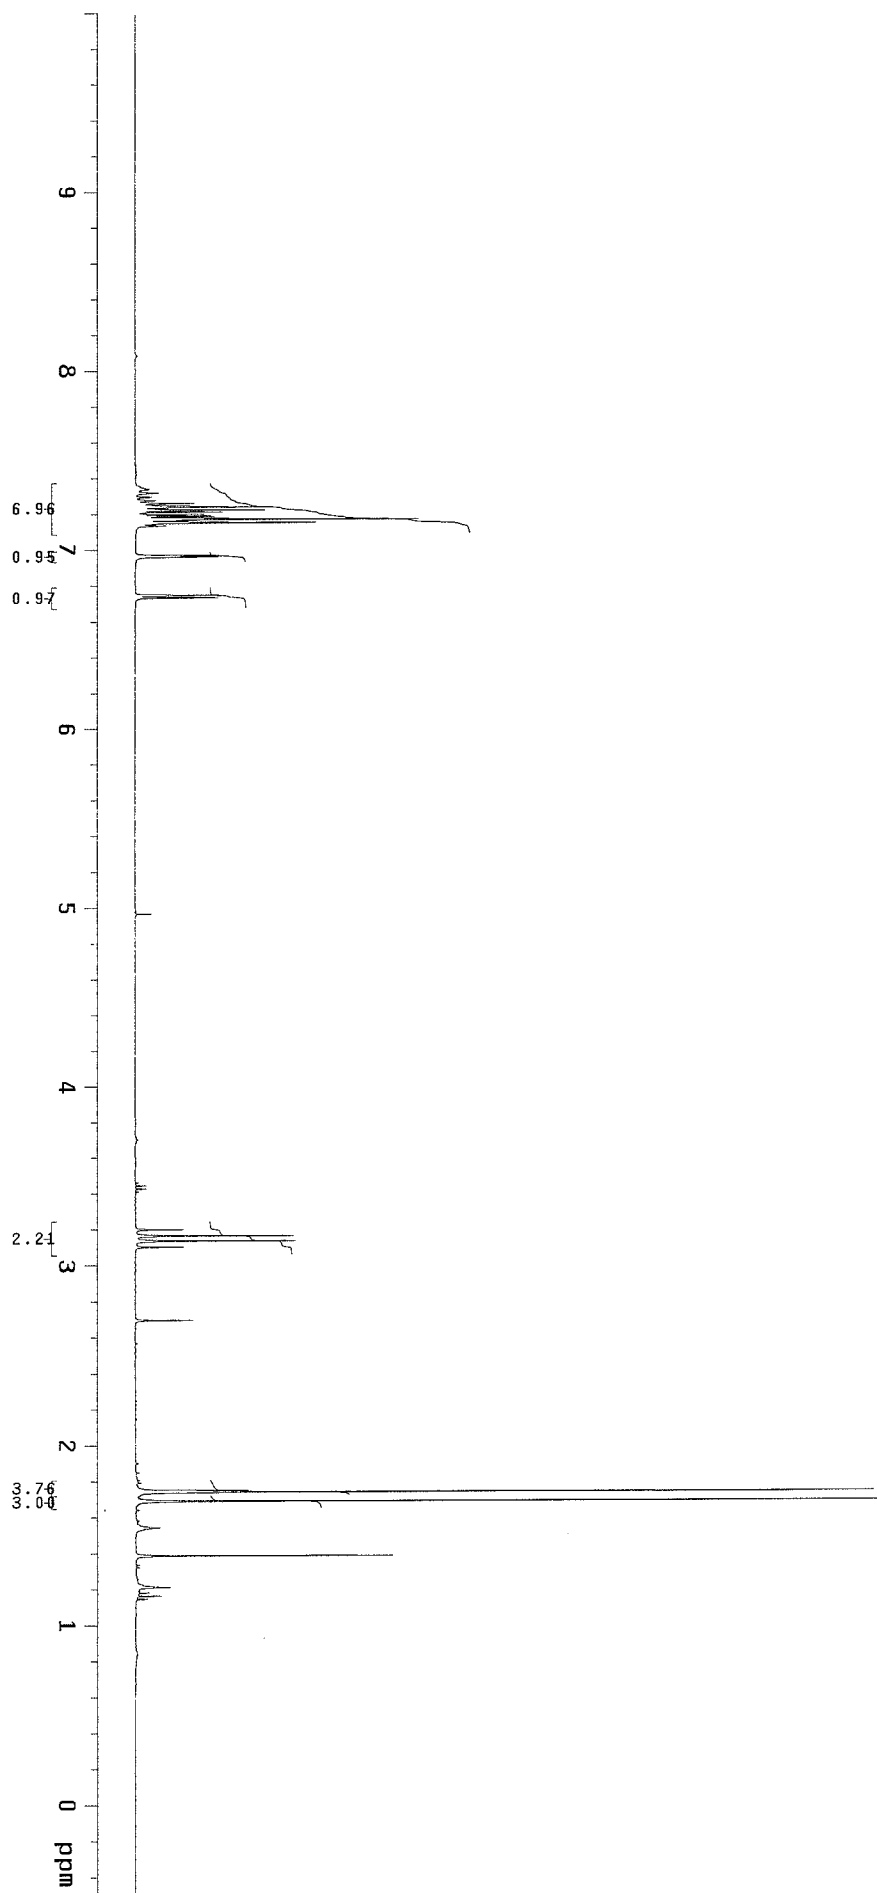



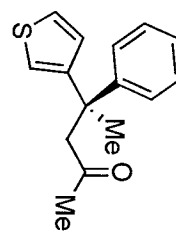

R-3a

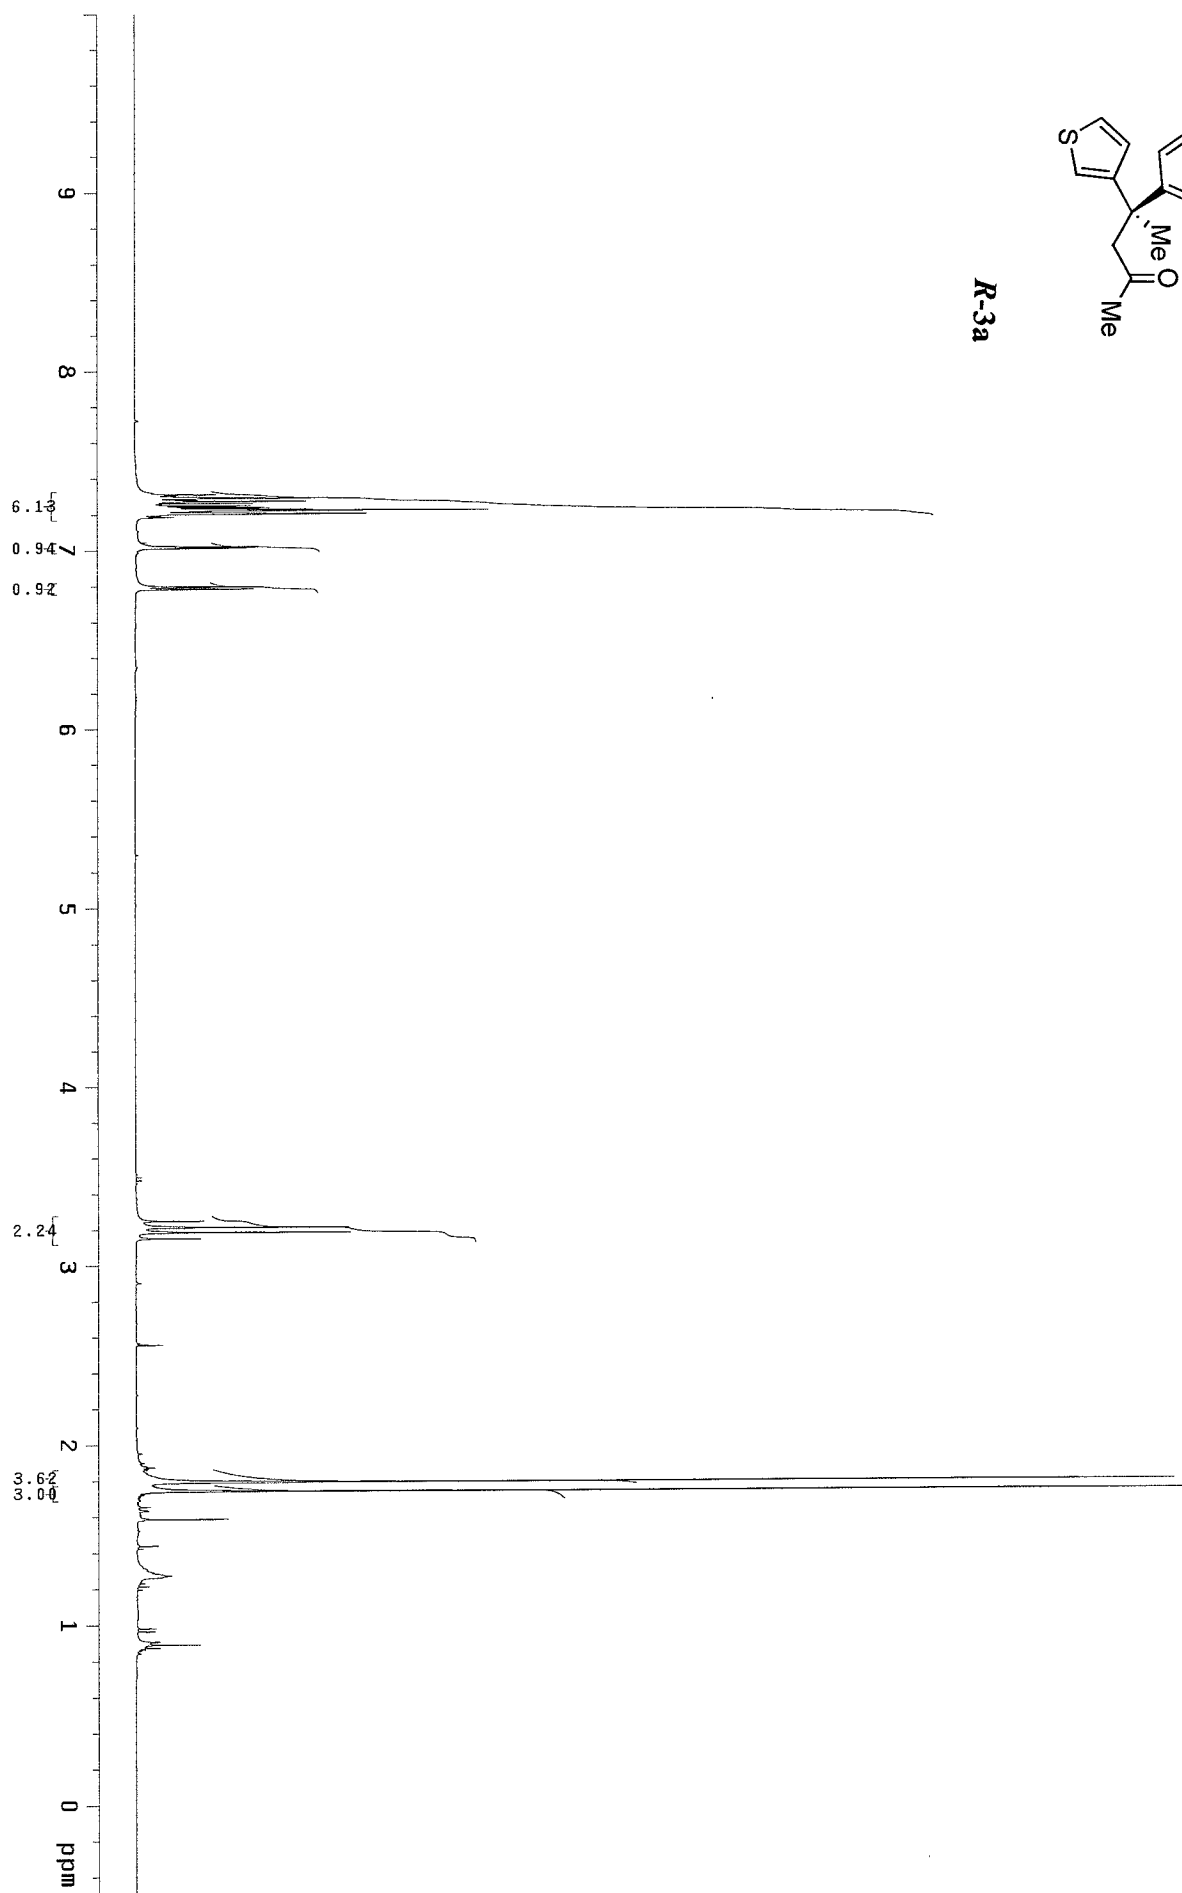

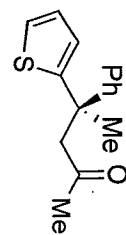

3b

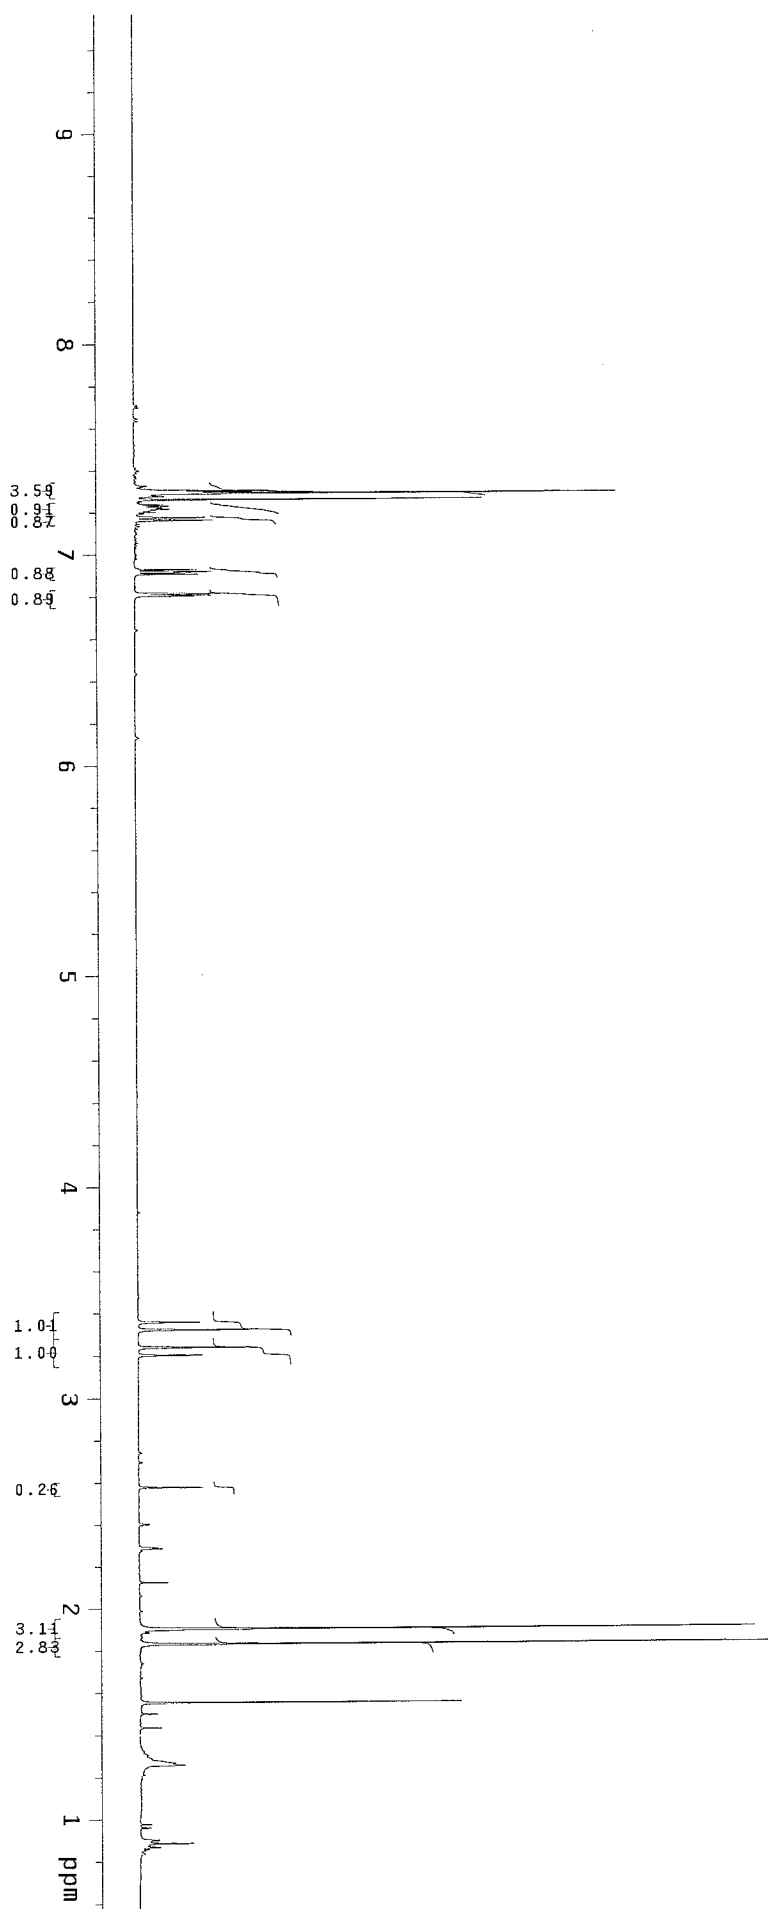

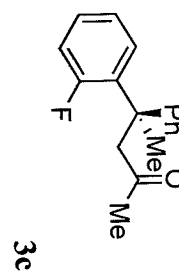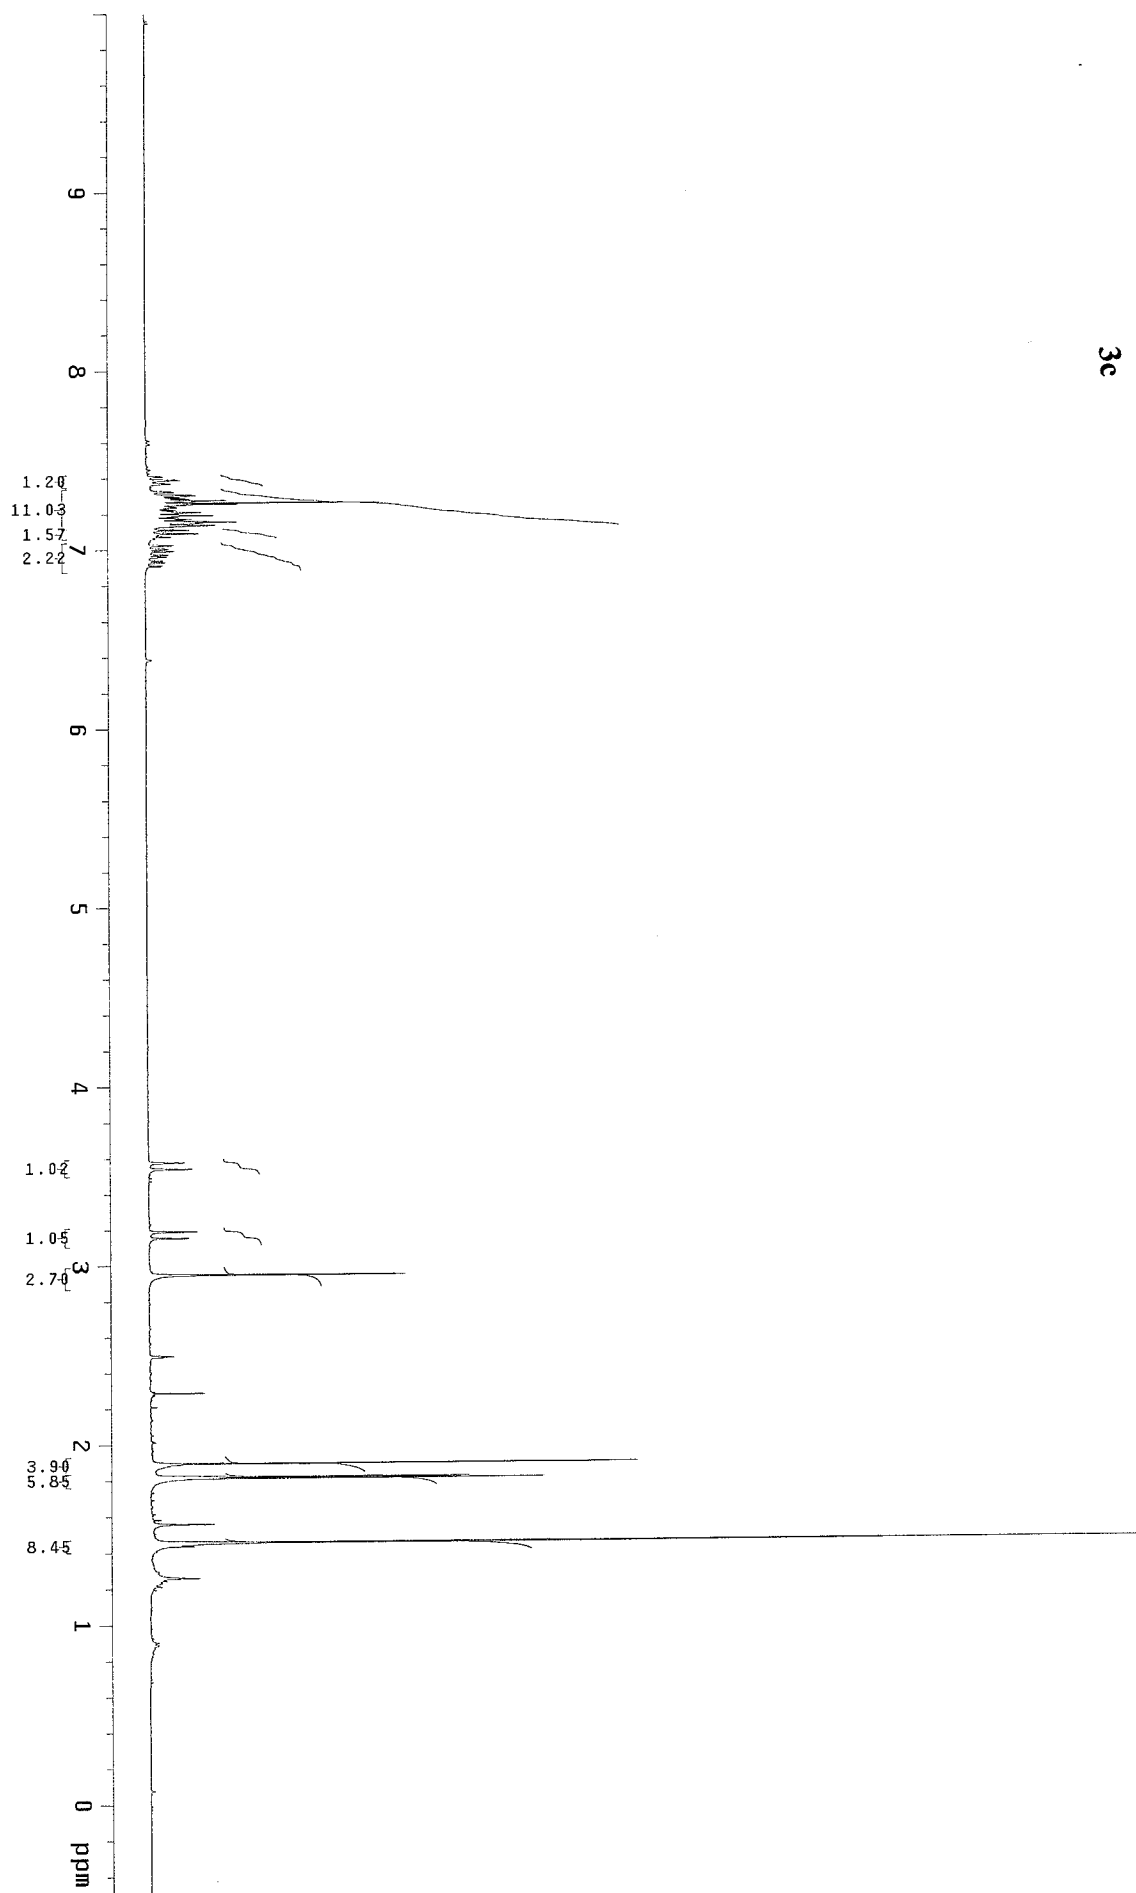

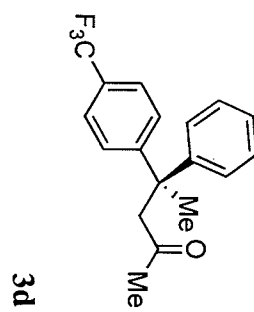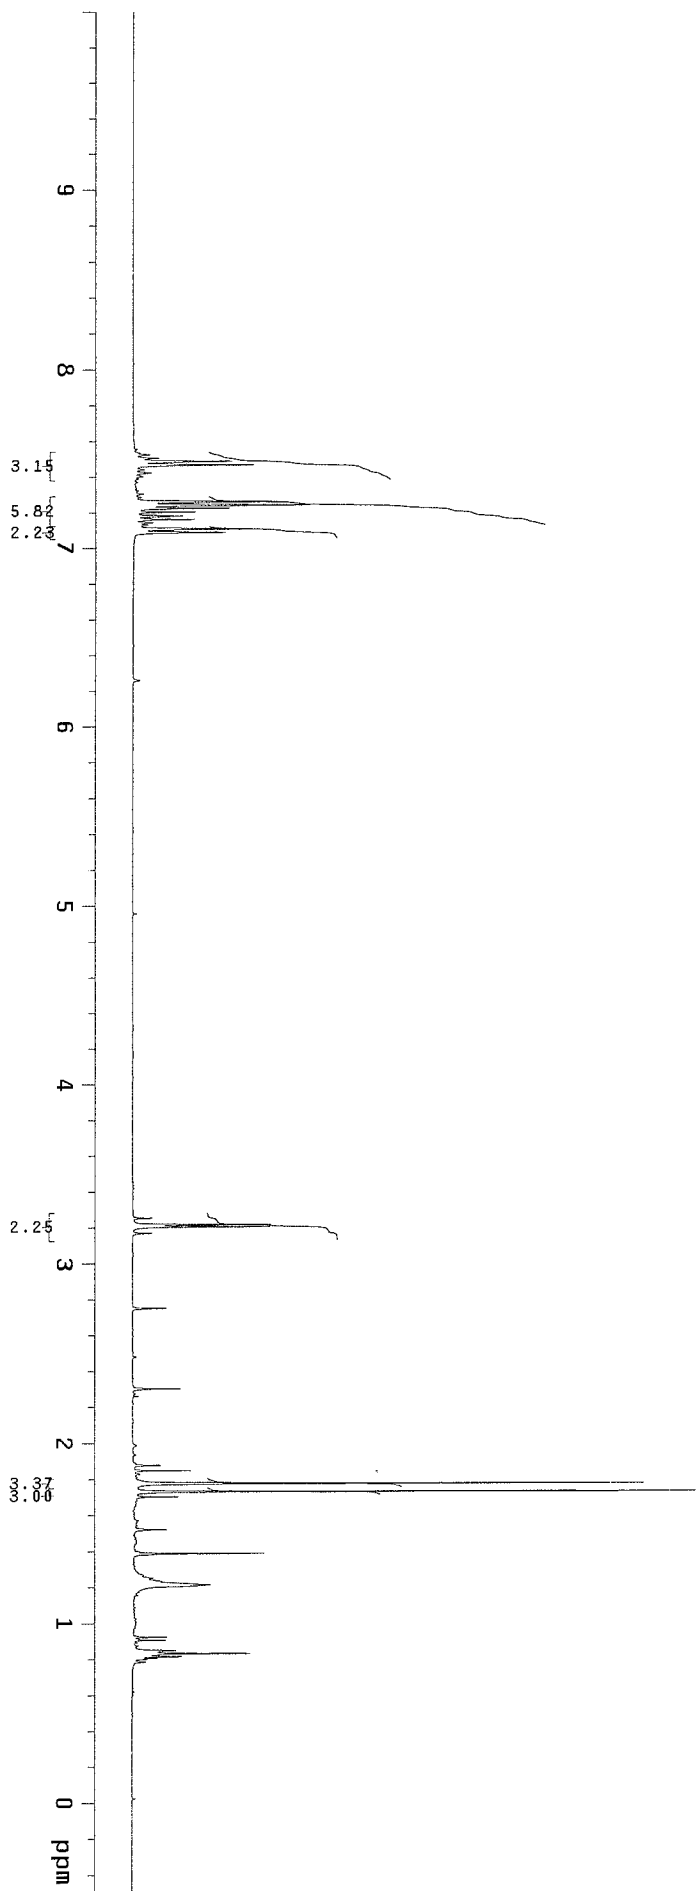

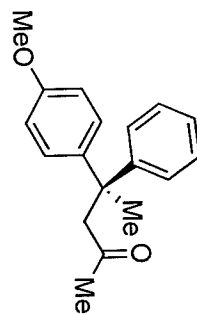

3e

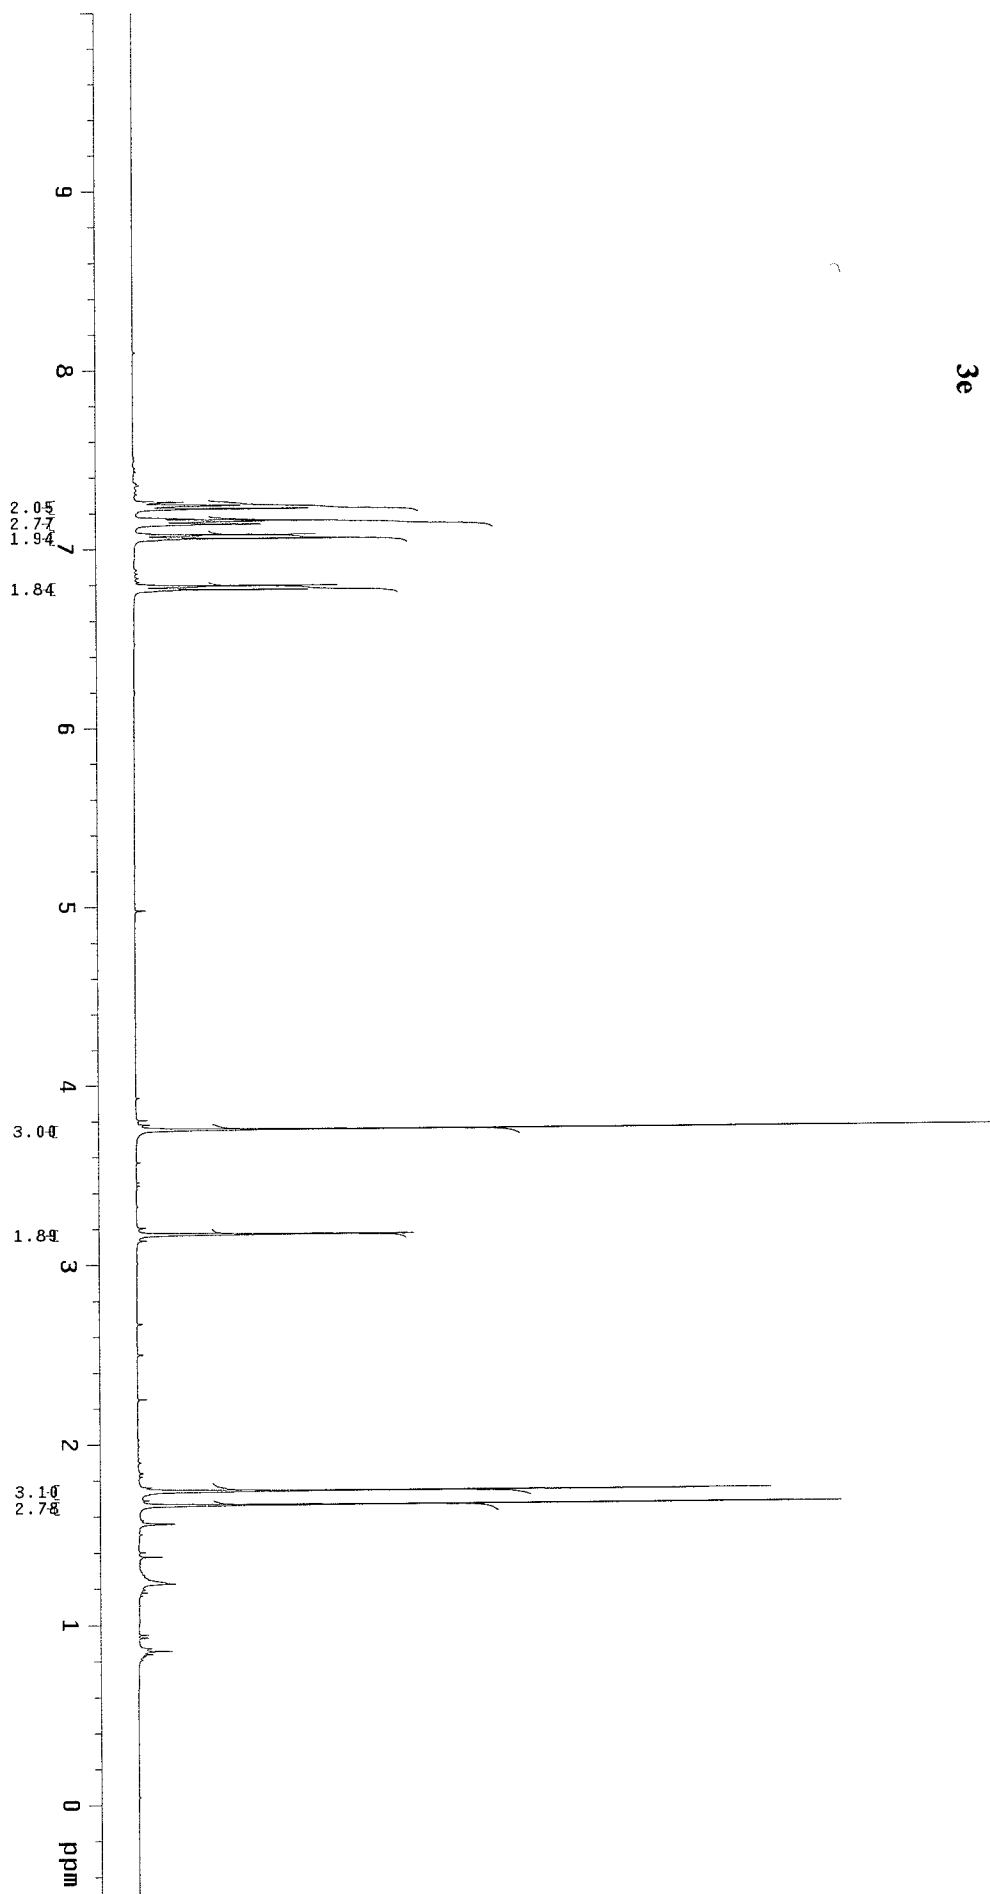

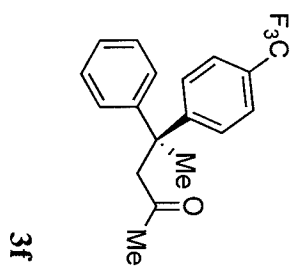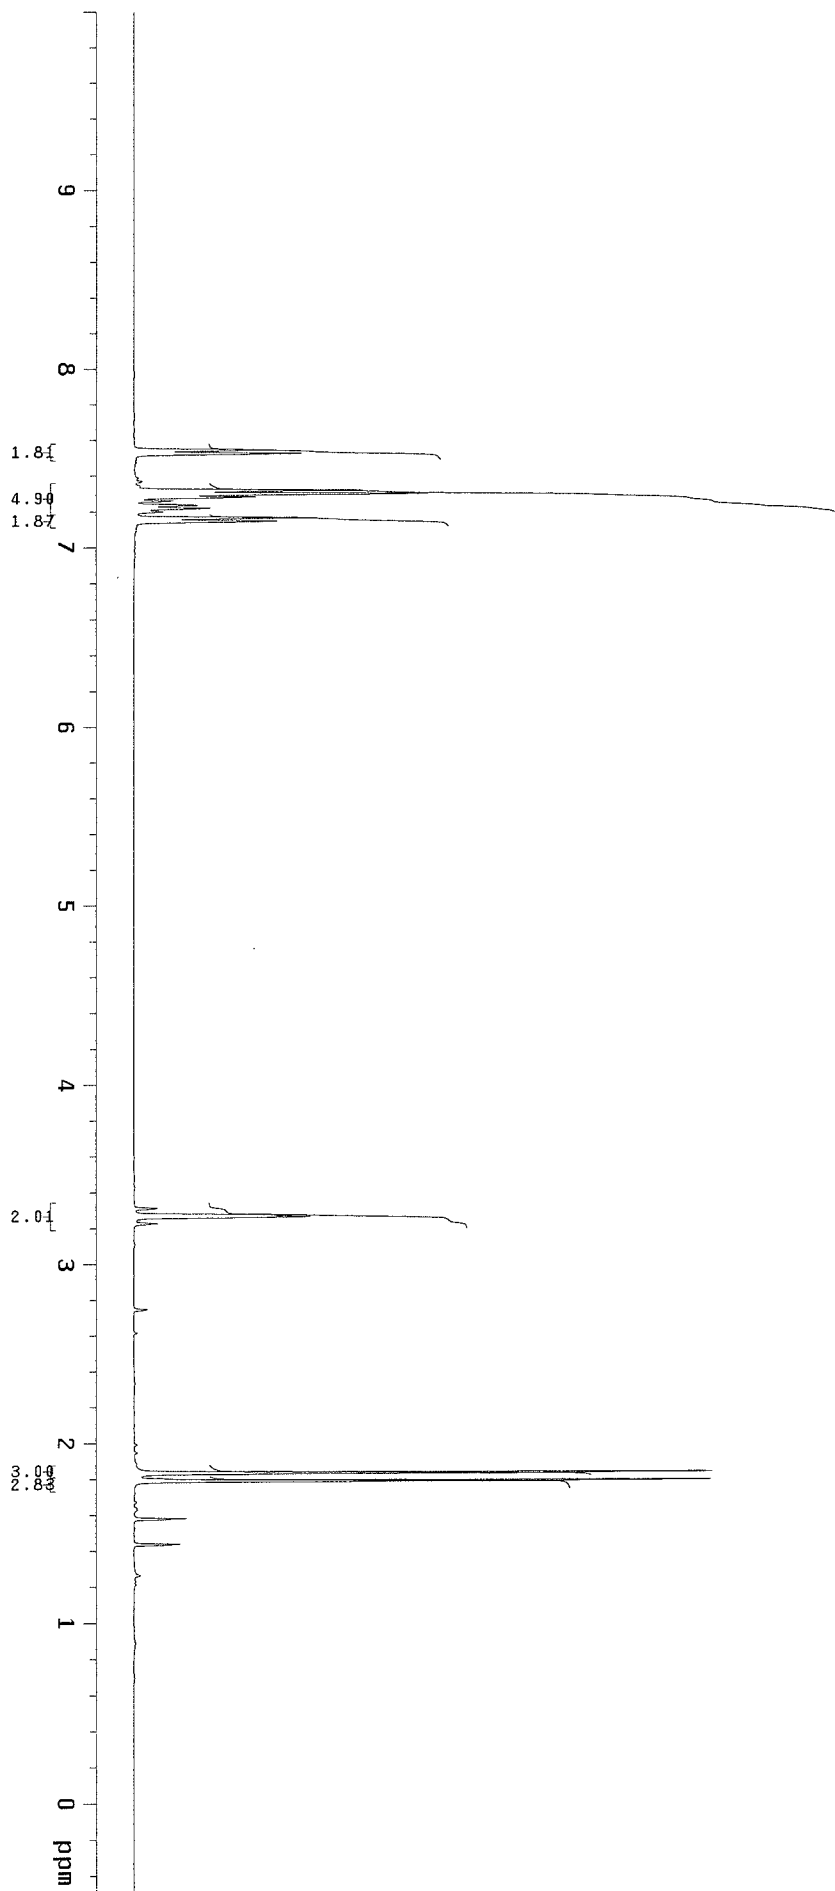

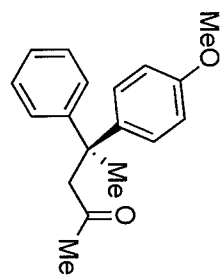

3g

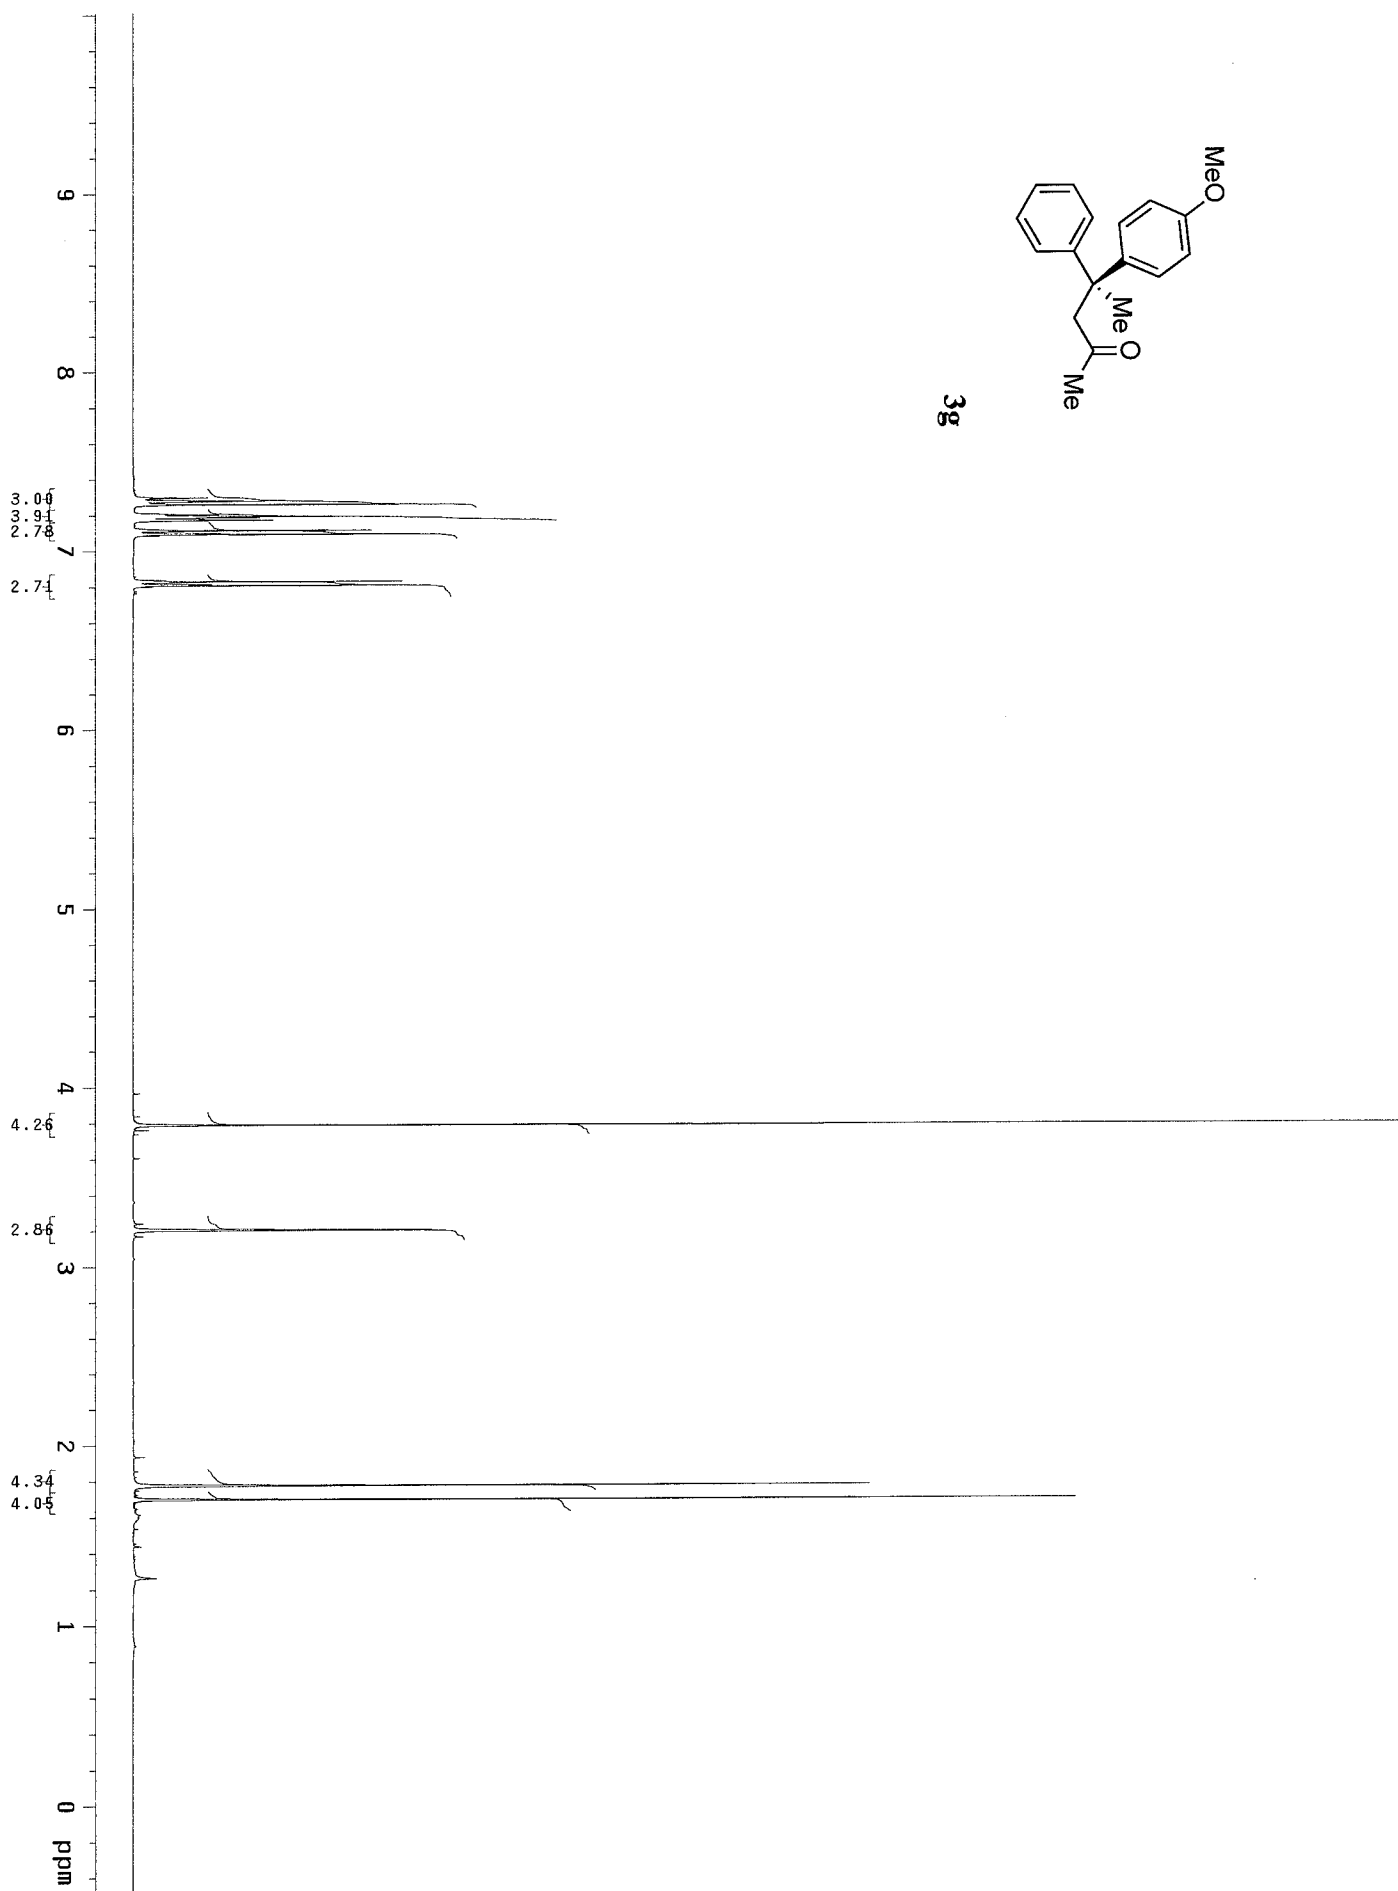

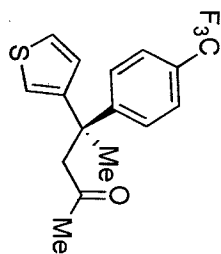

3h

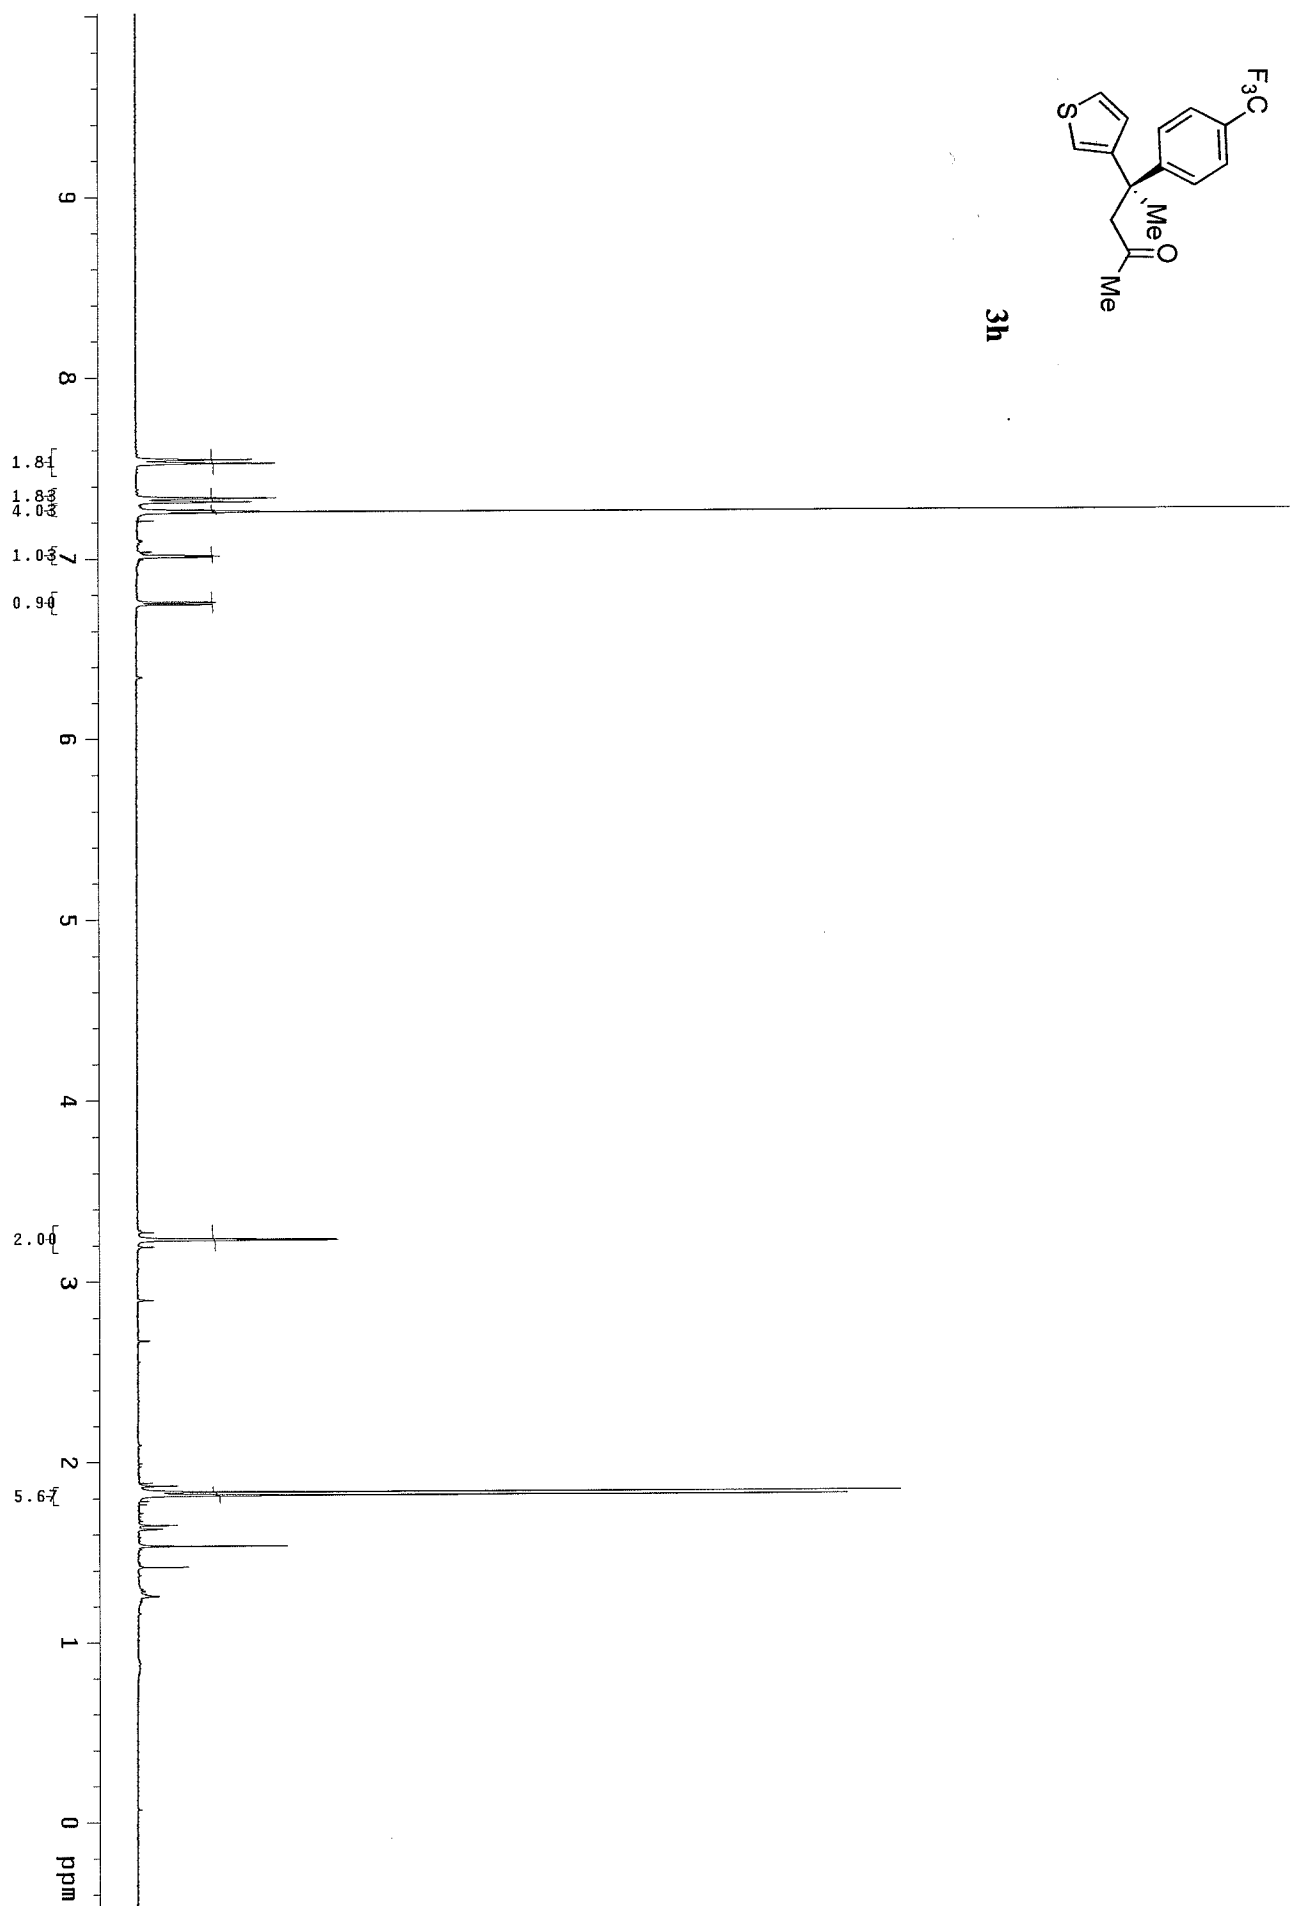



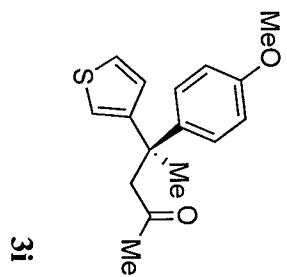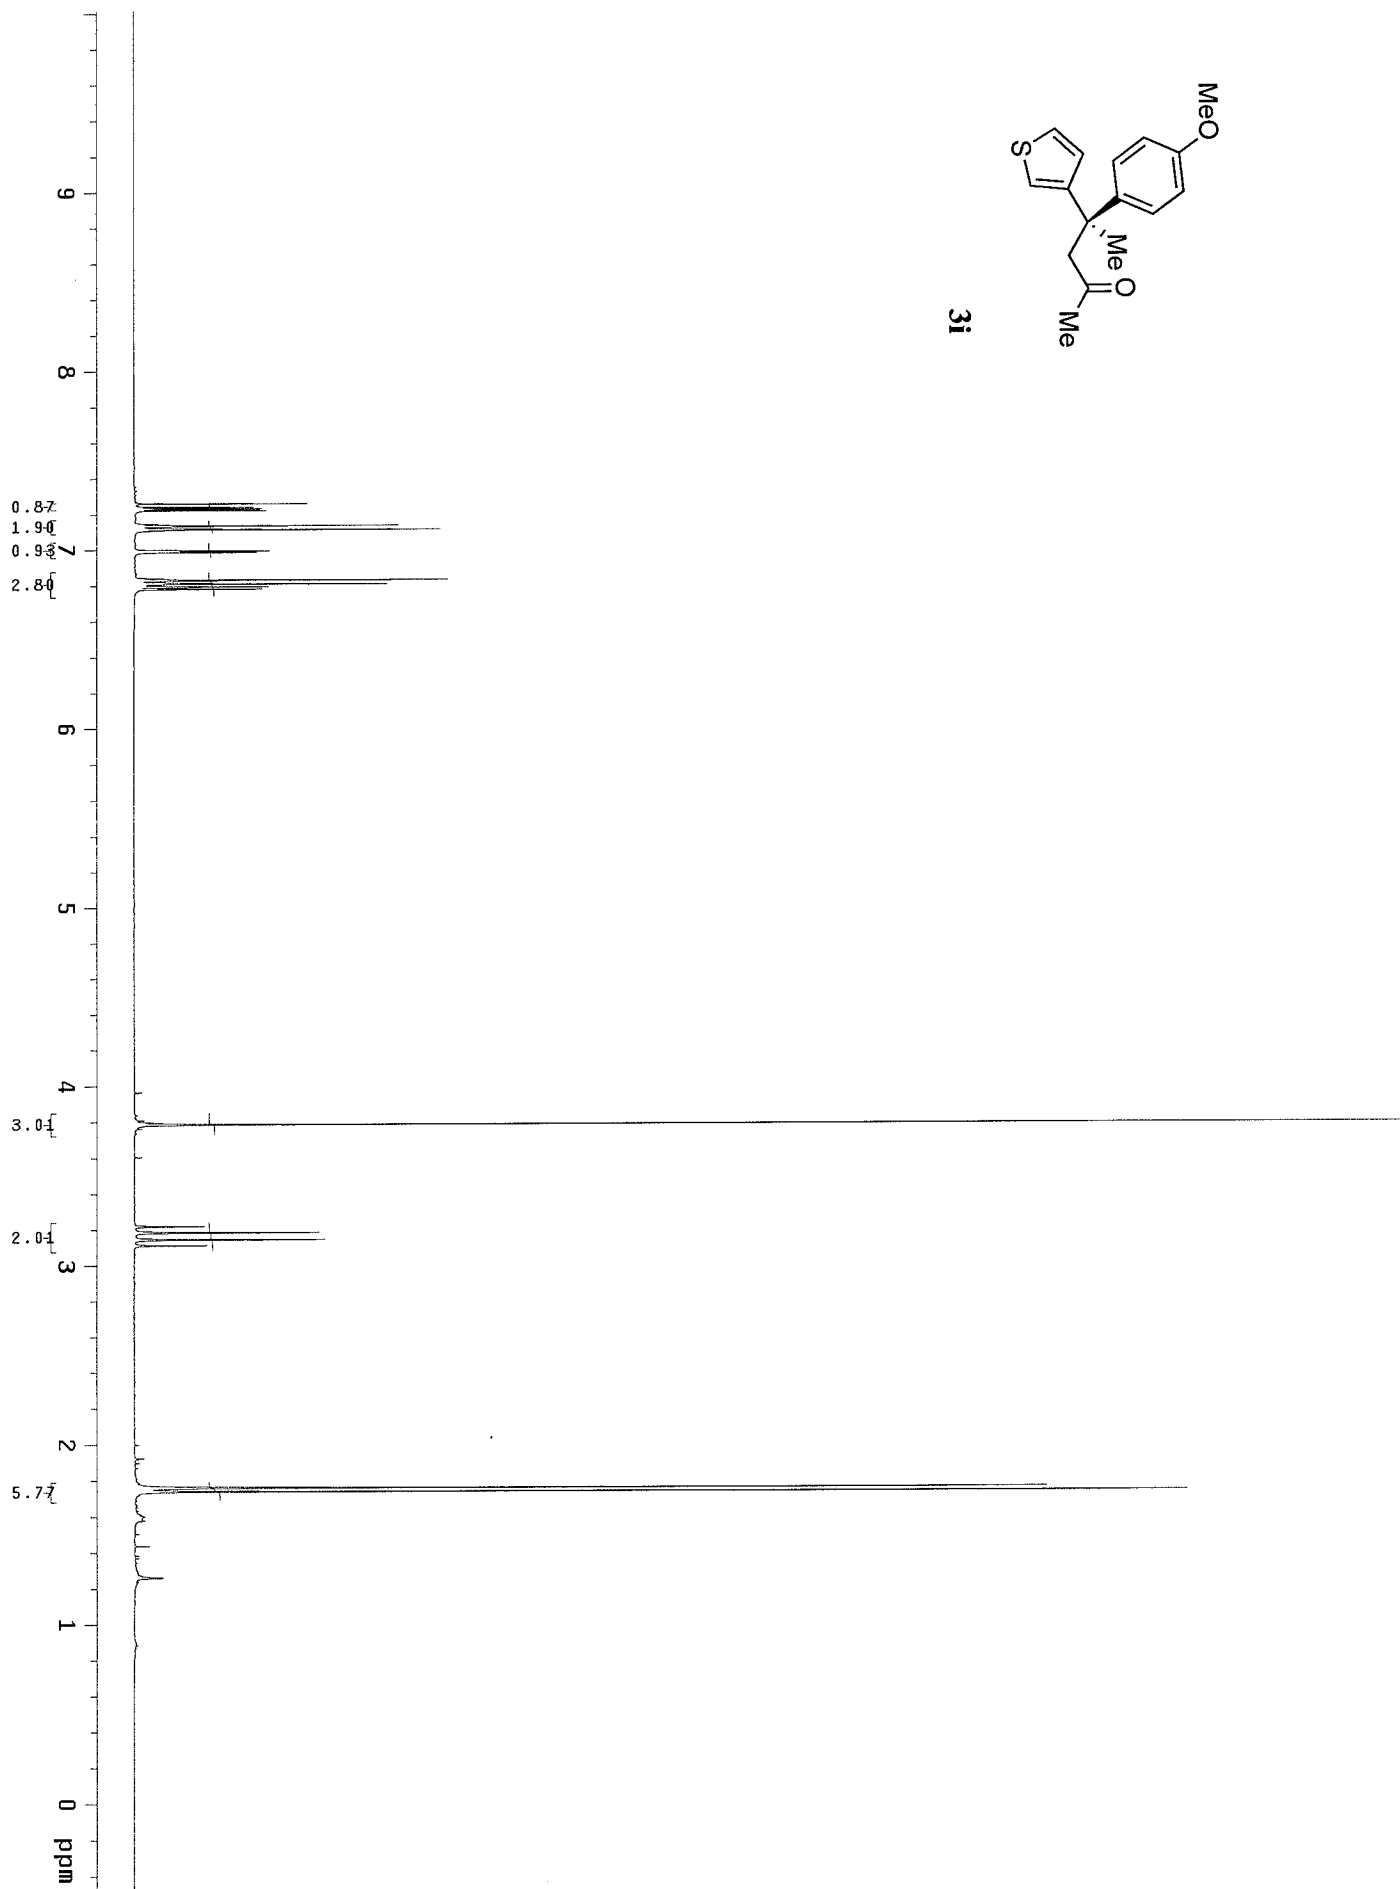

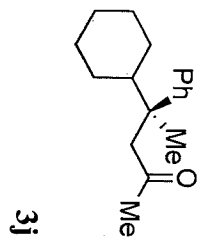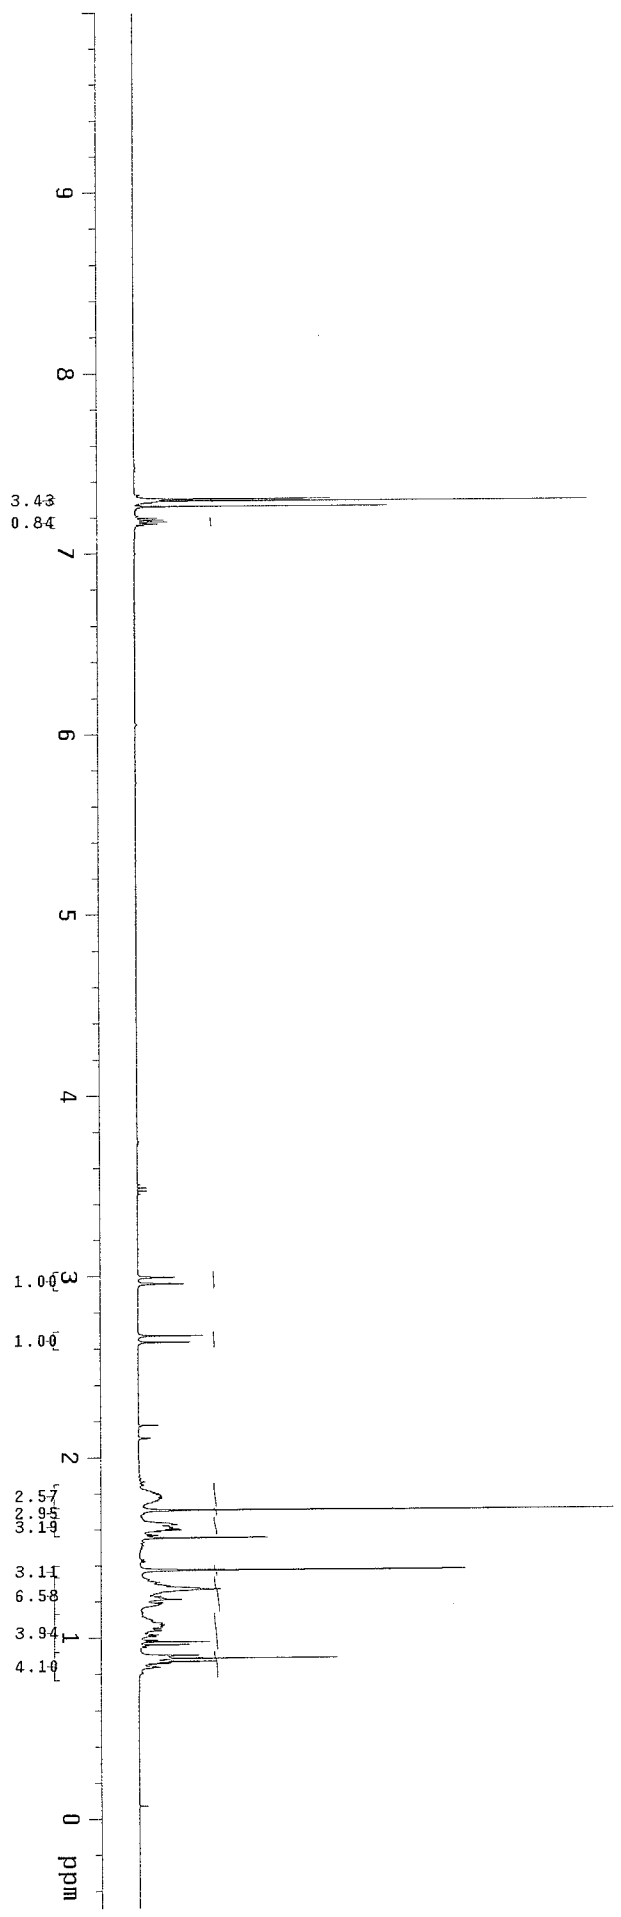

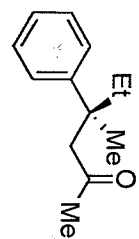

S-5a

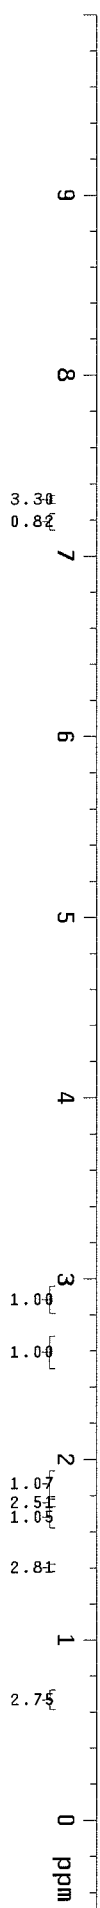

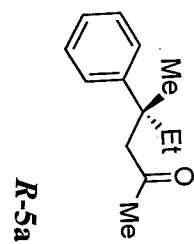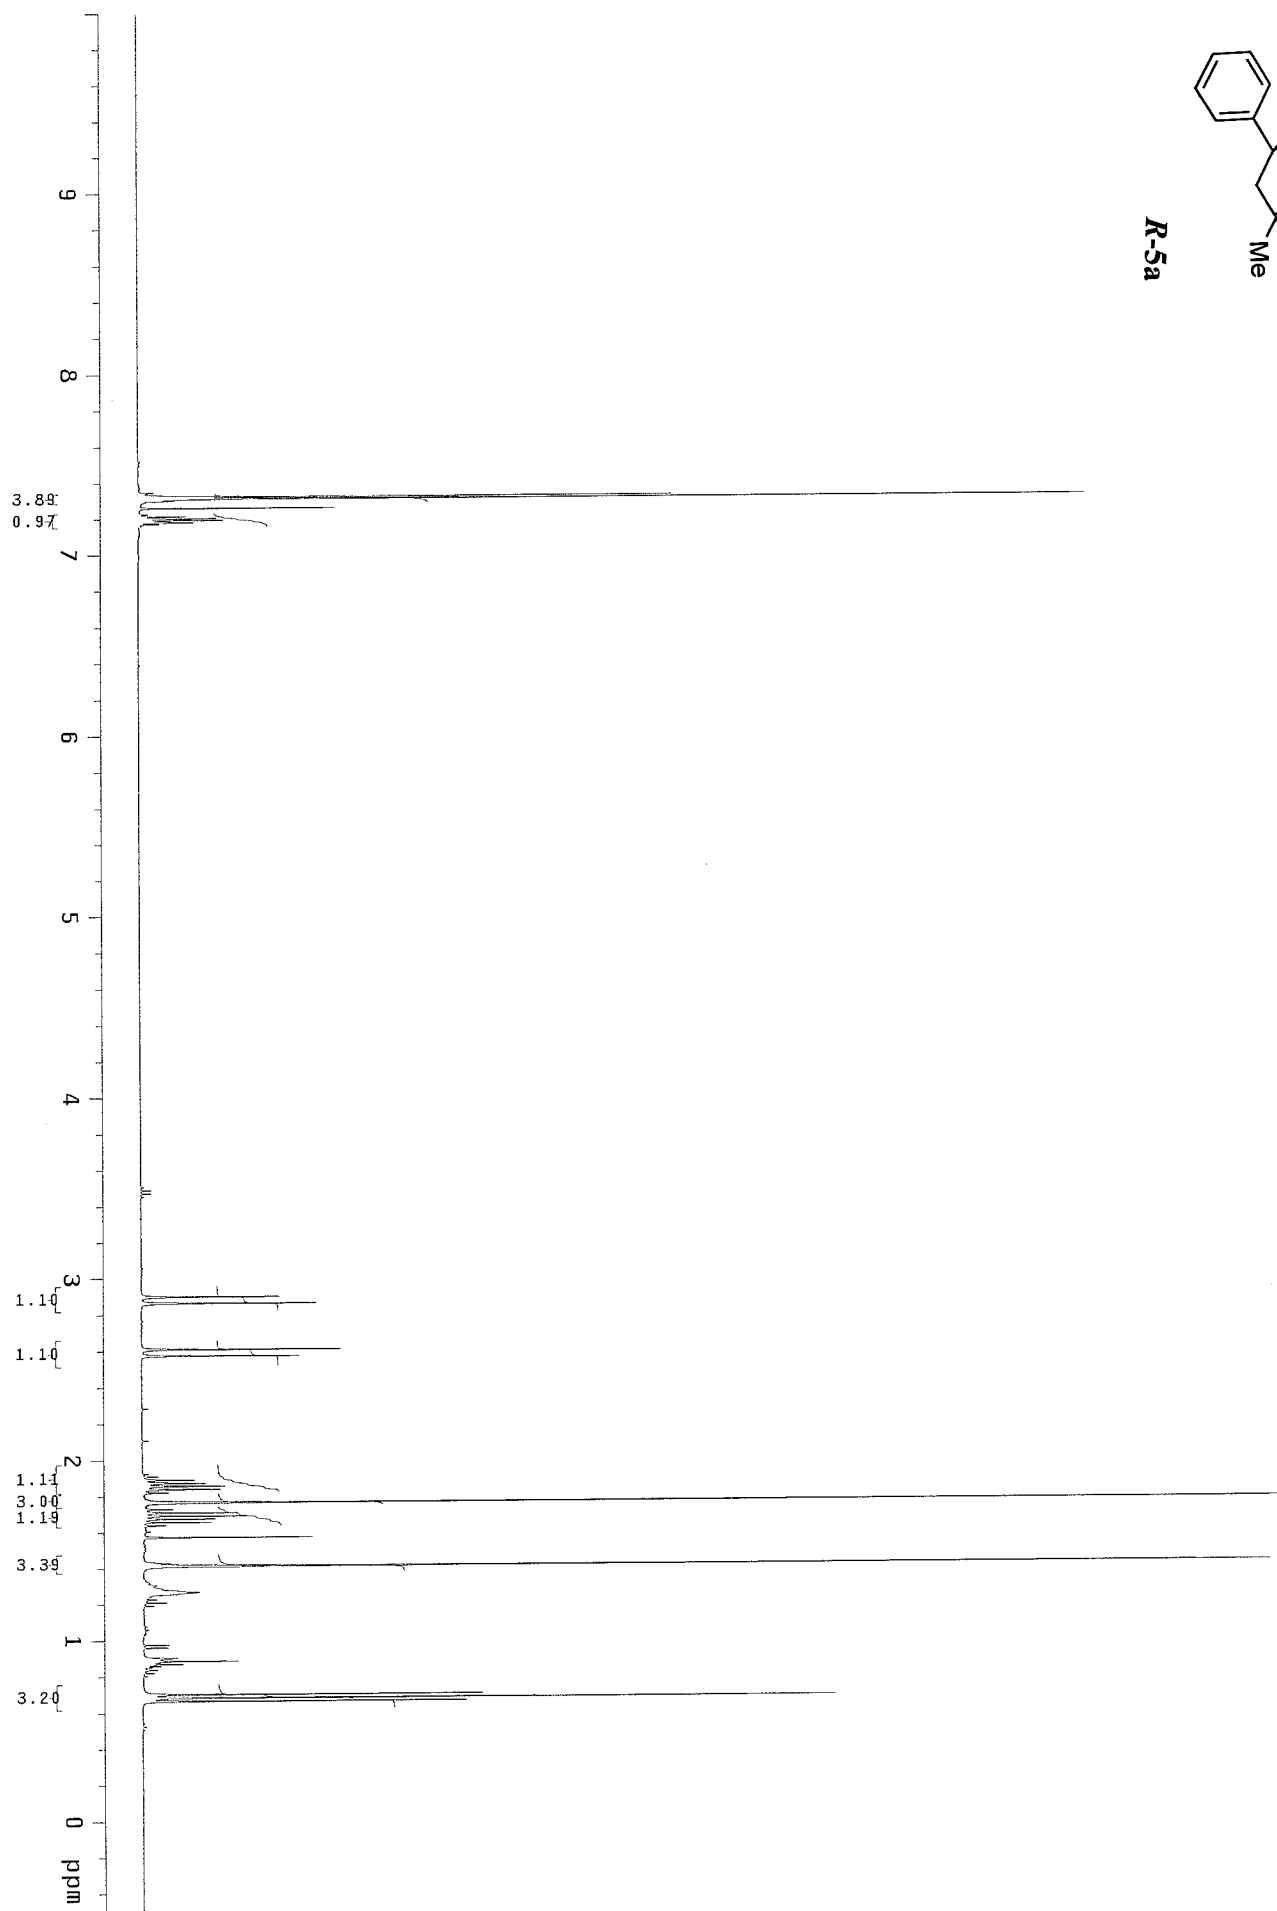

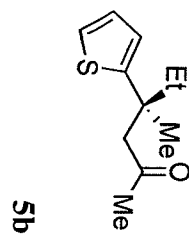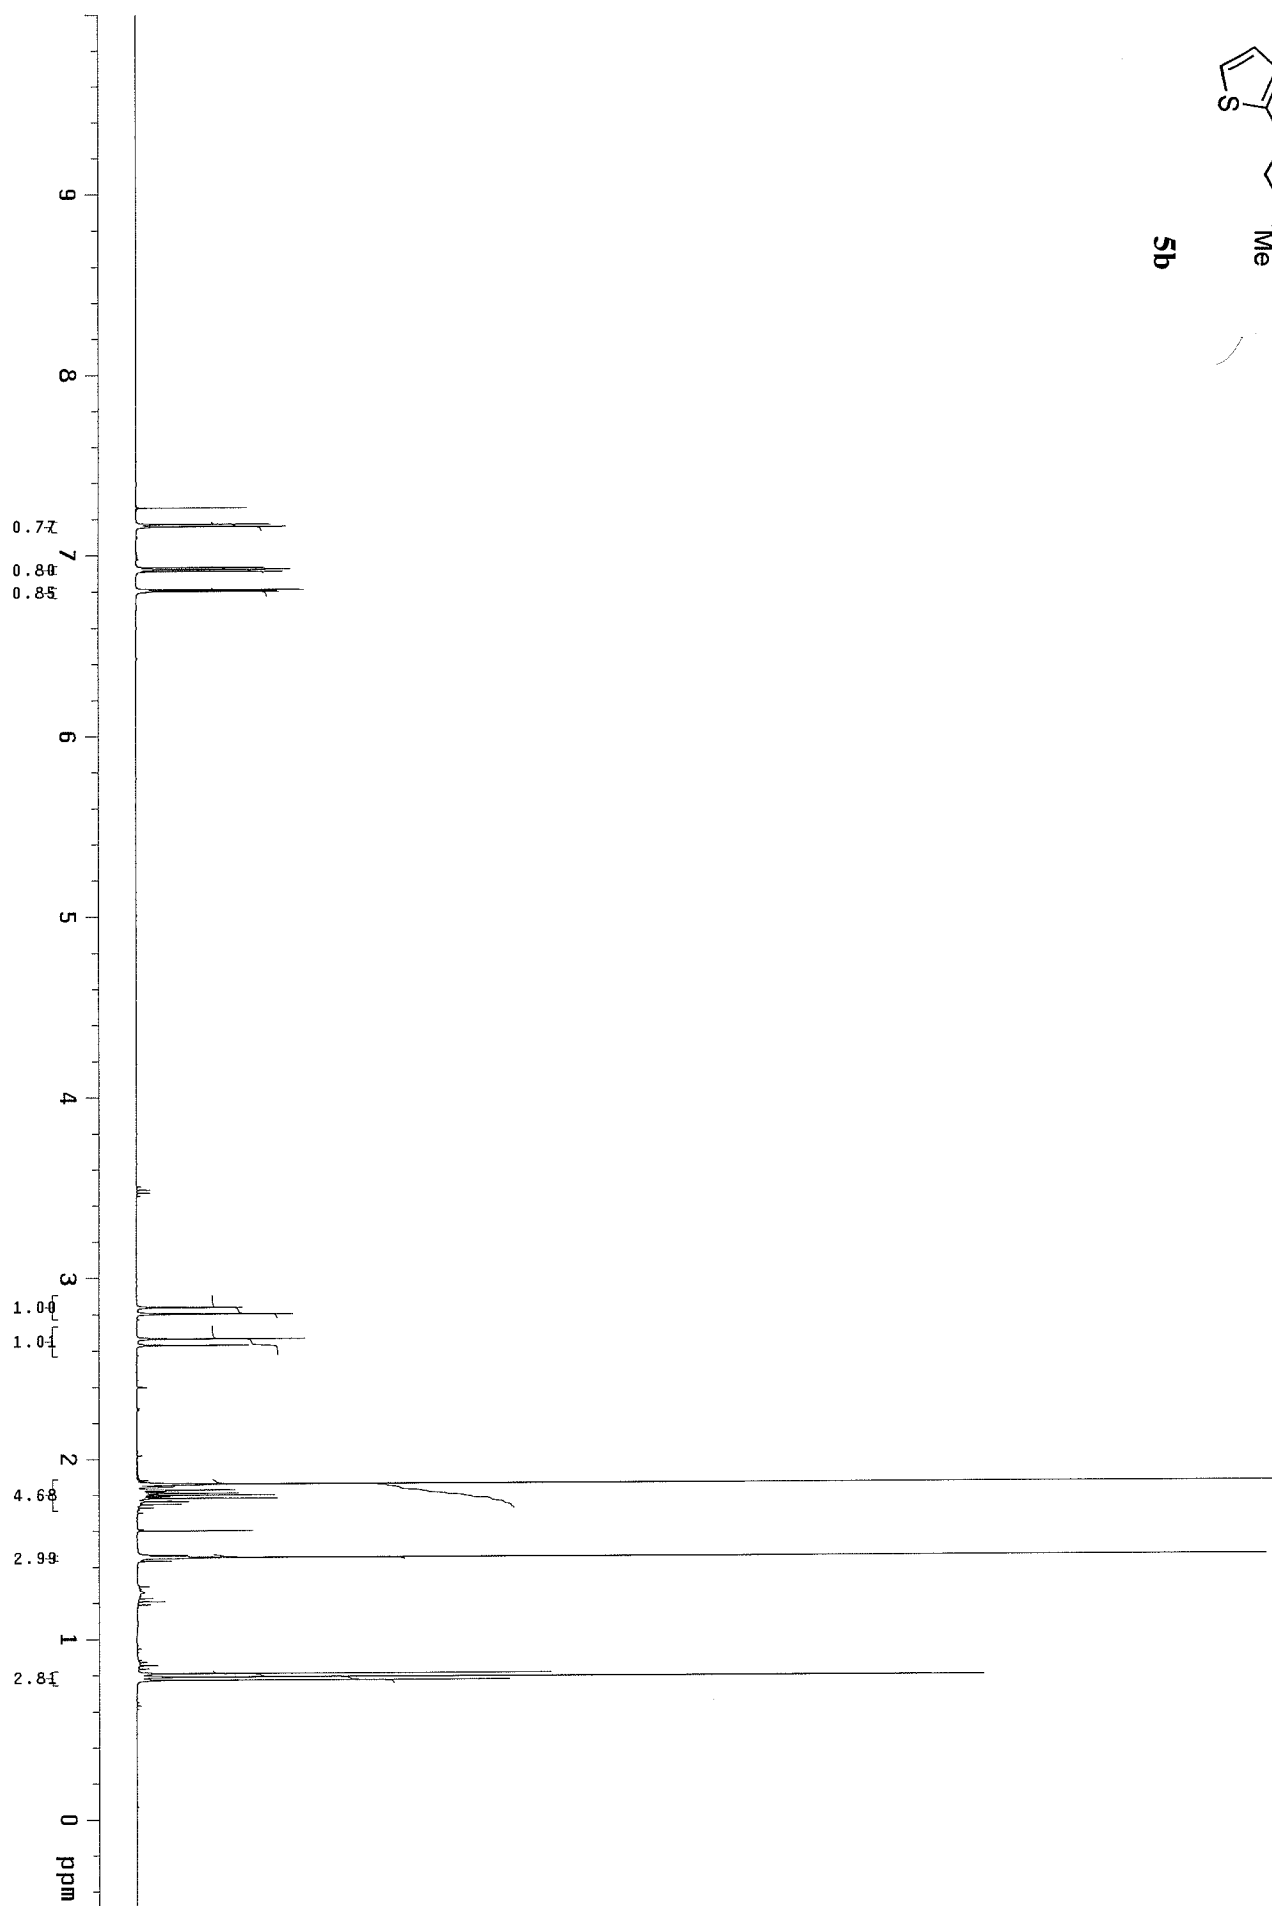



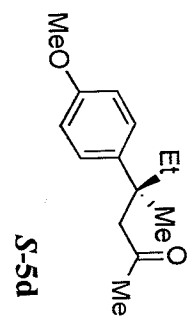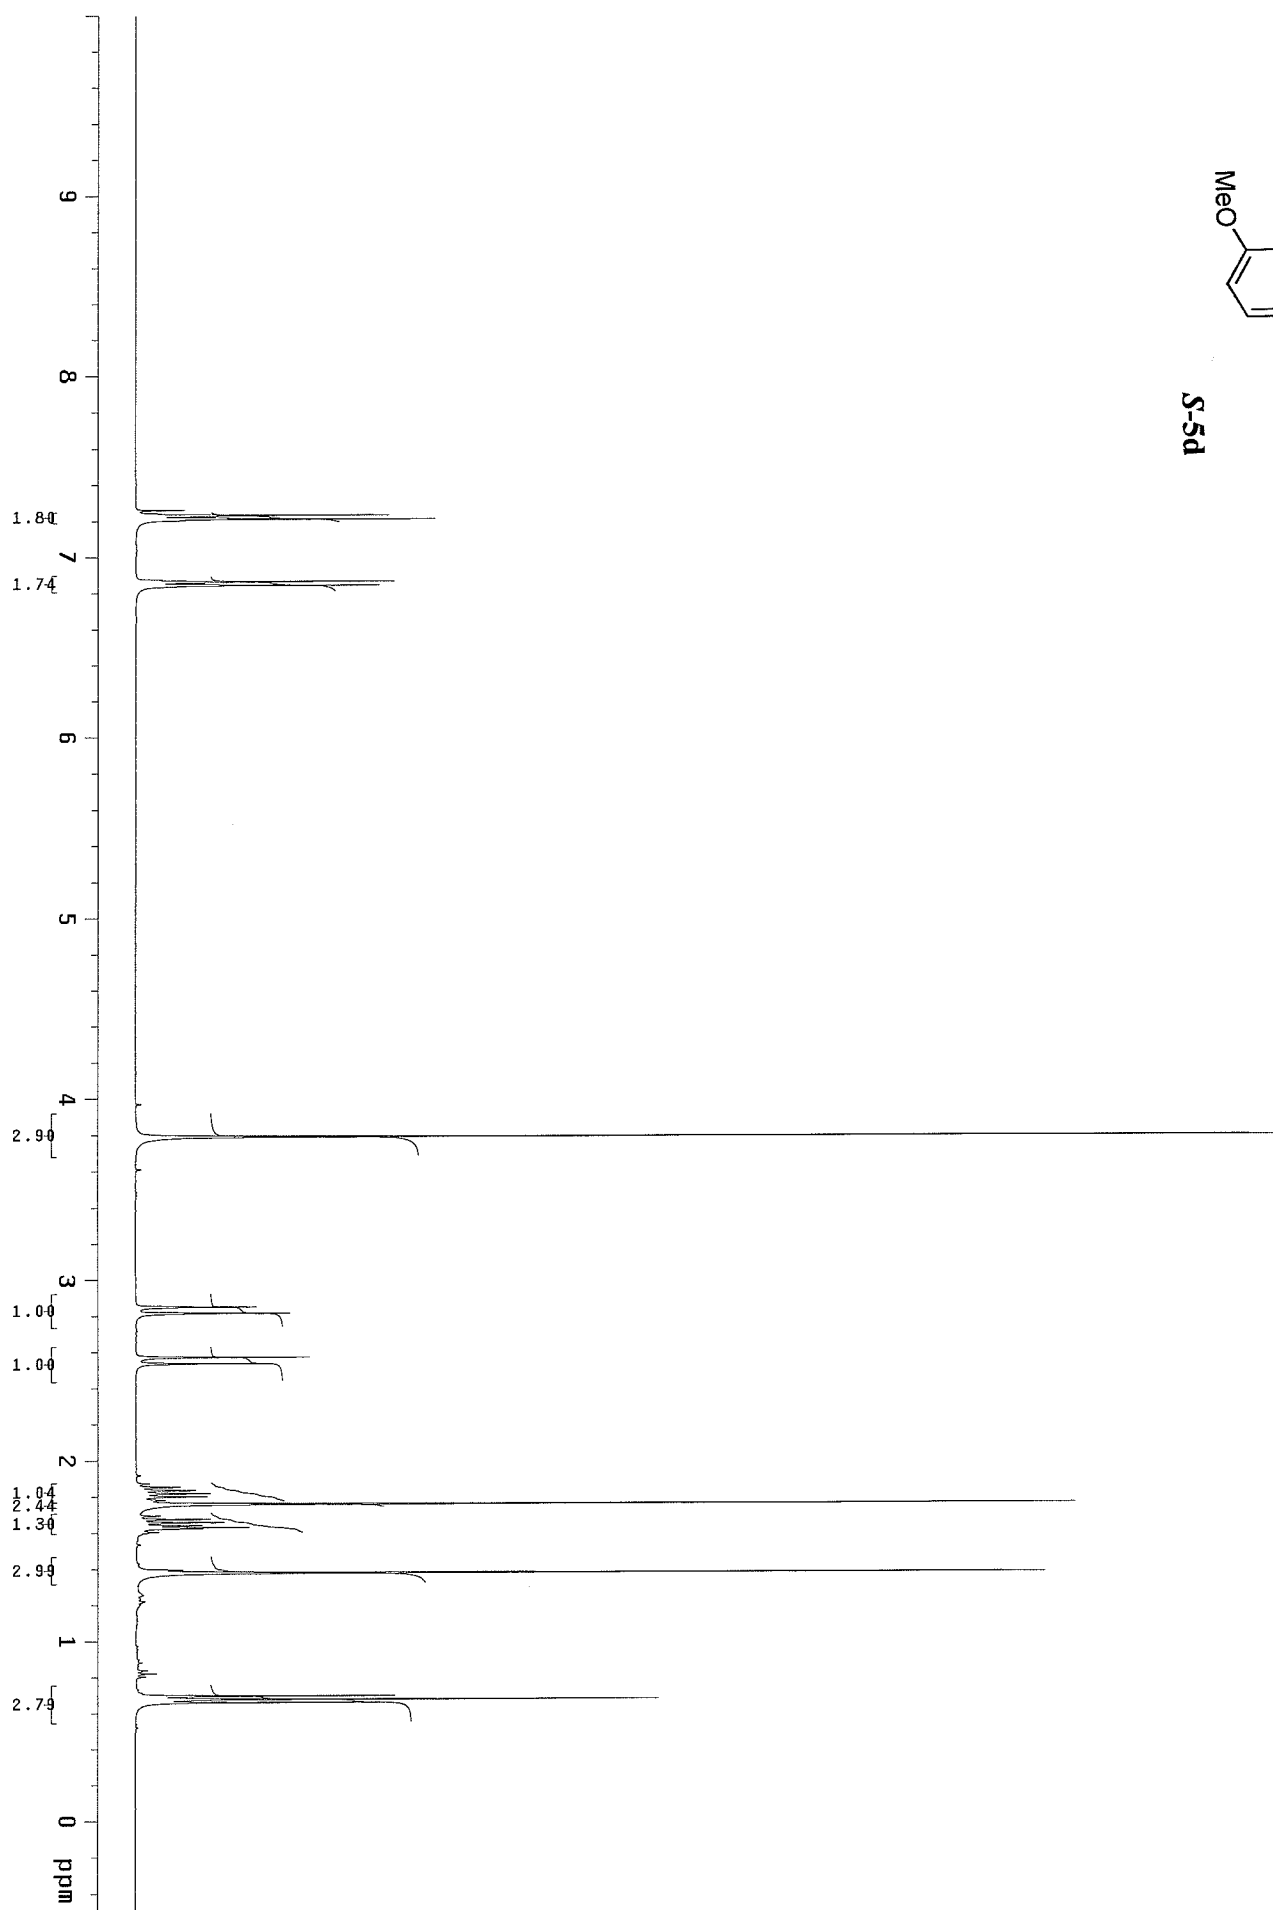

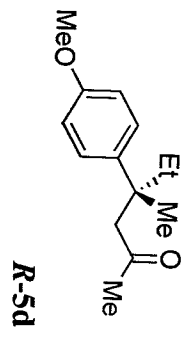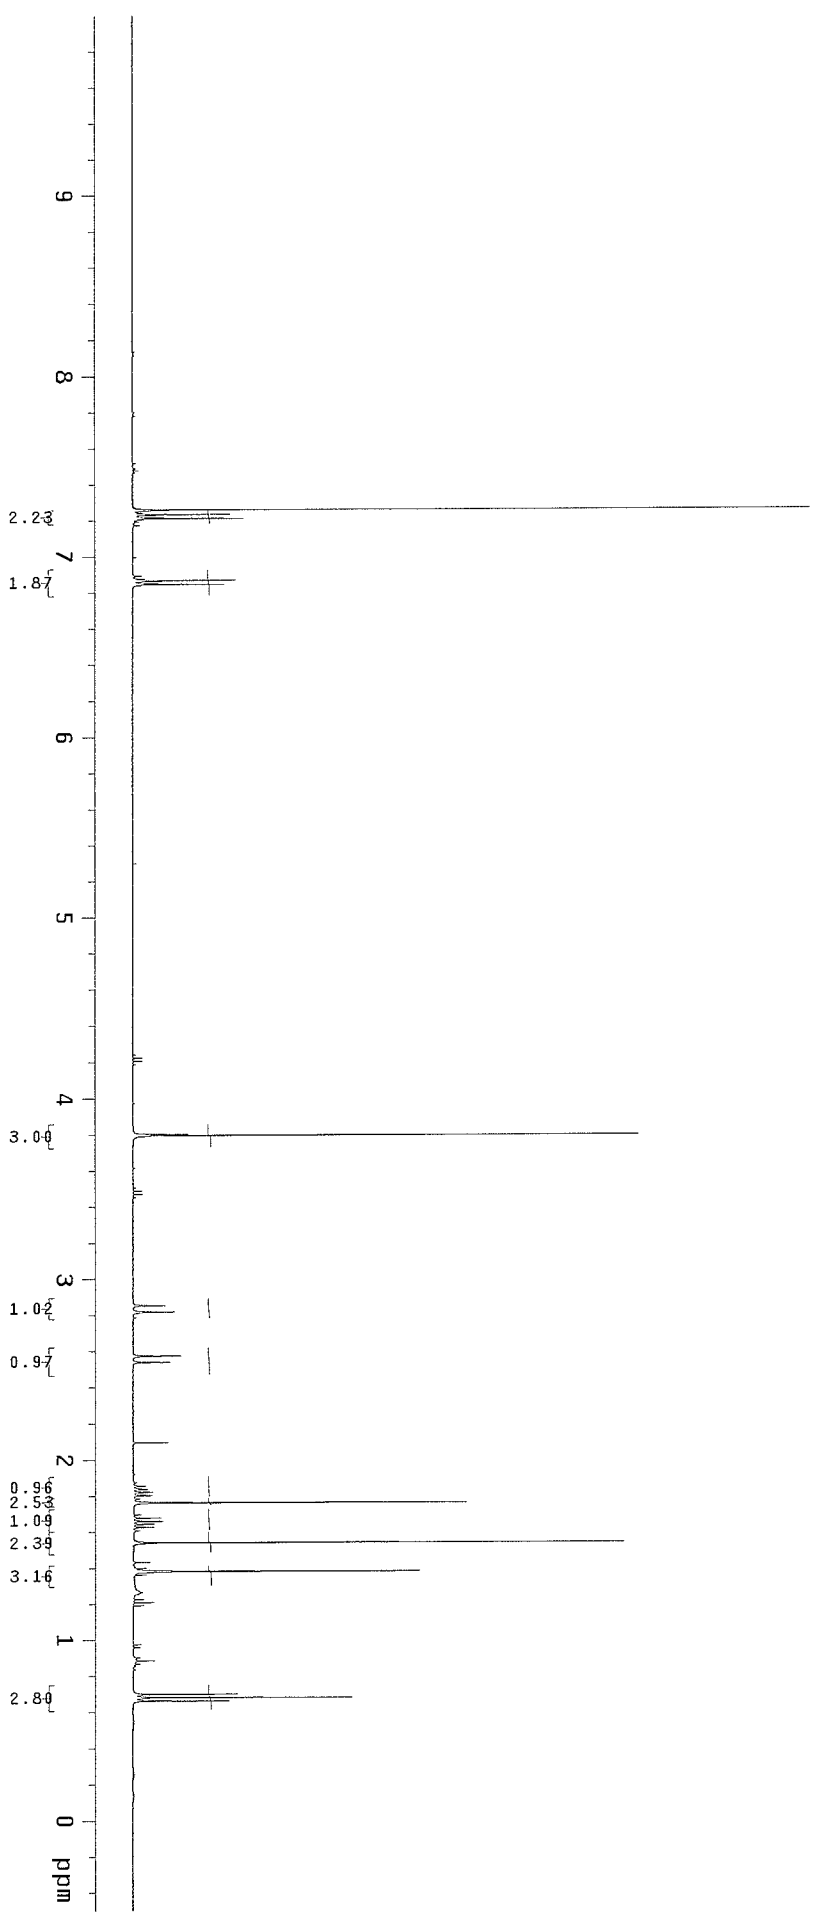



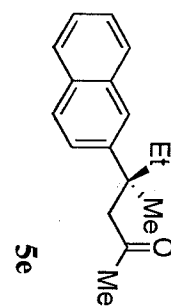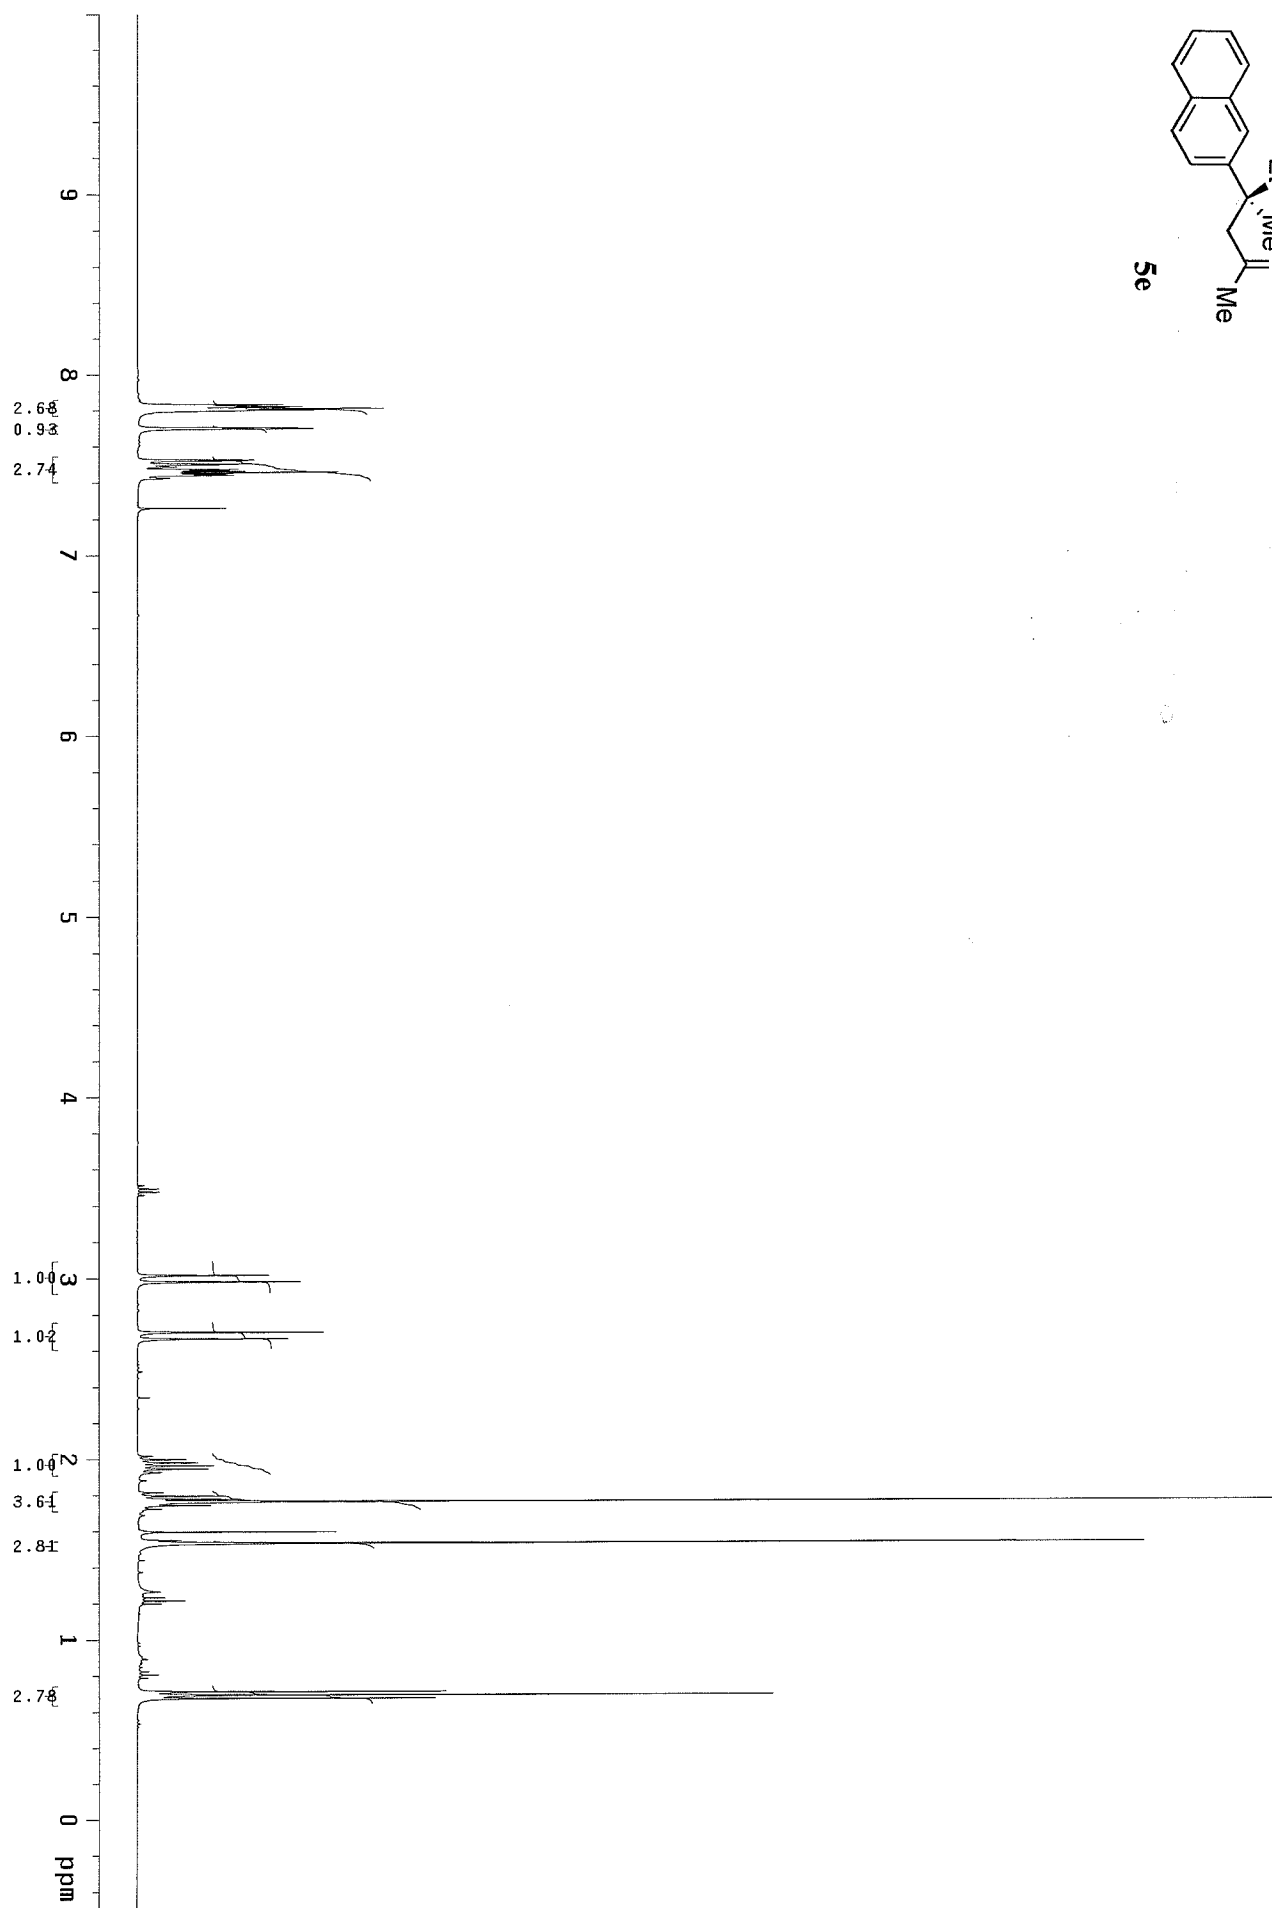

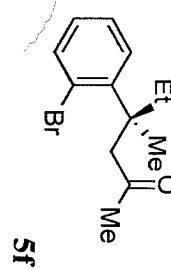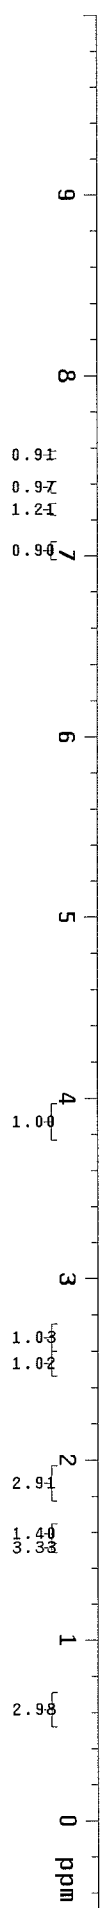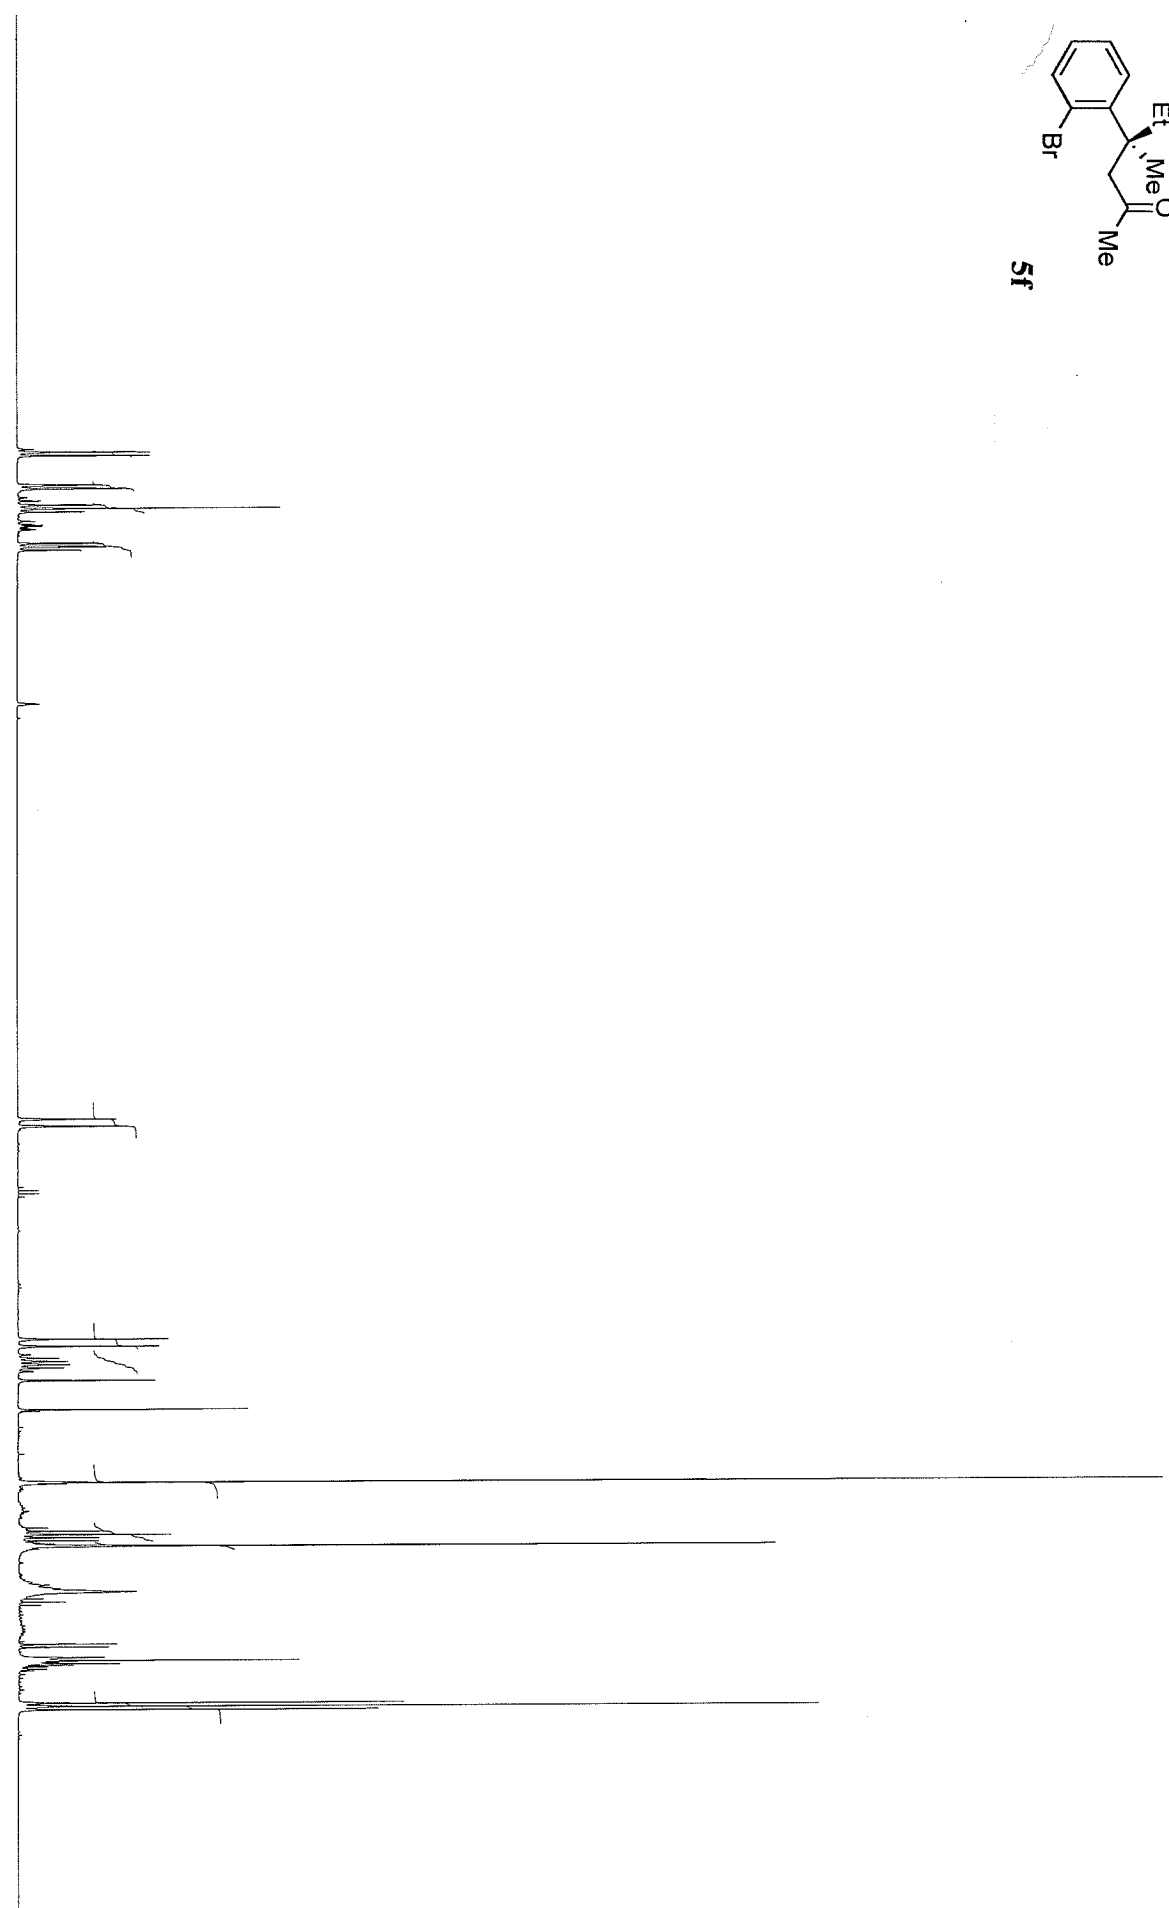

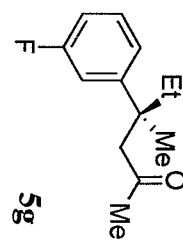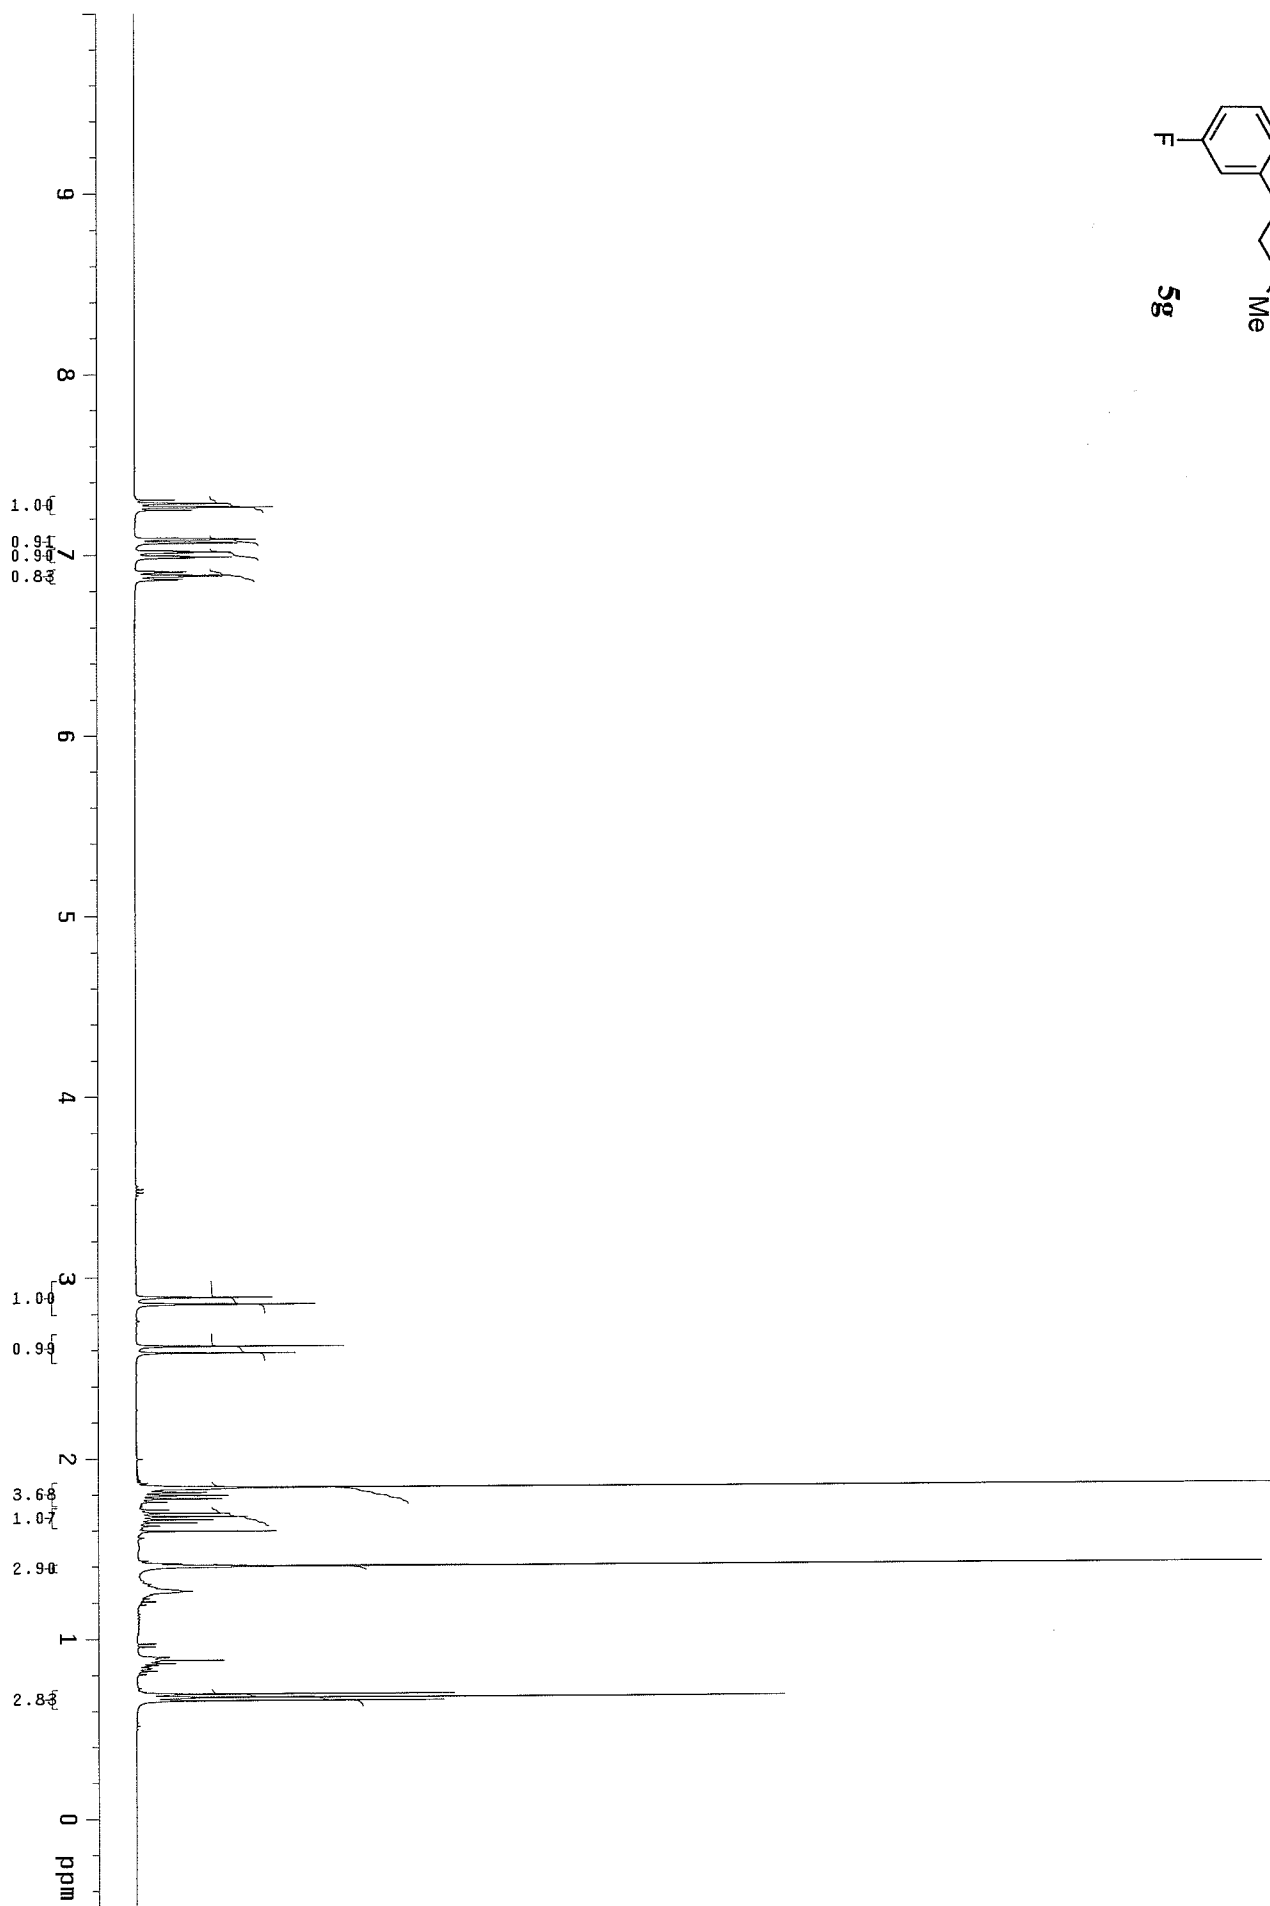

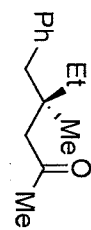

6<sup>a</sup>

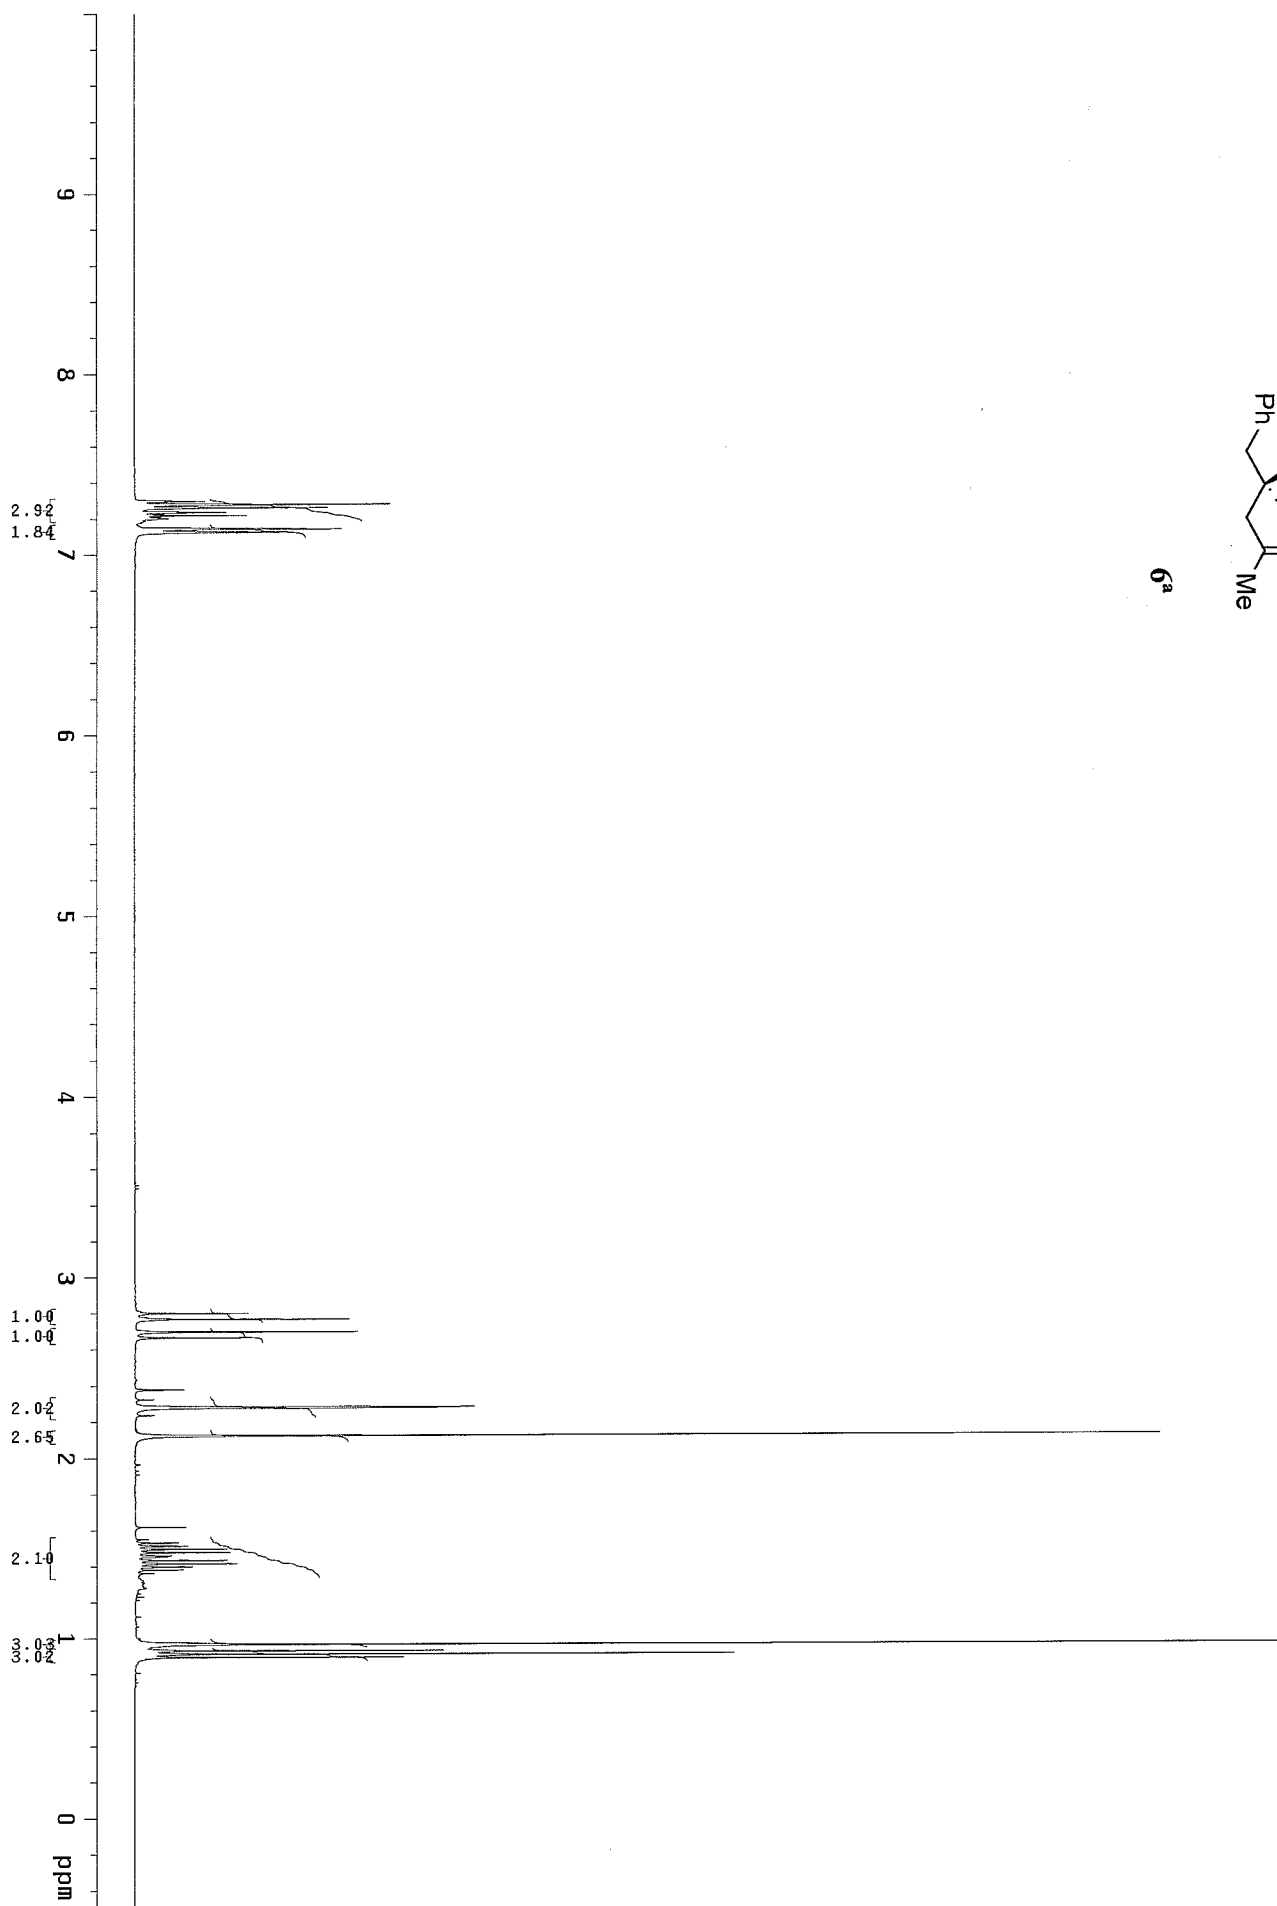

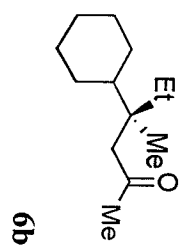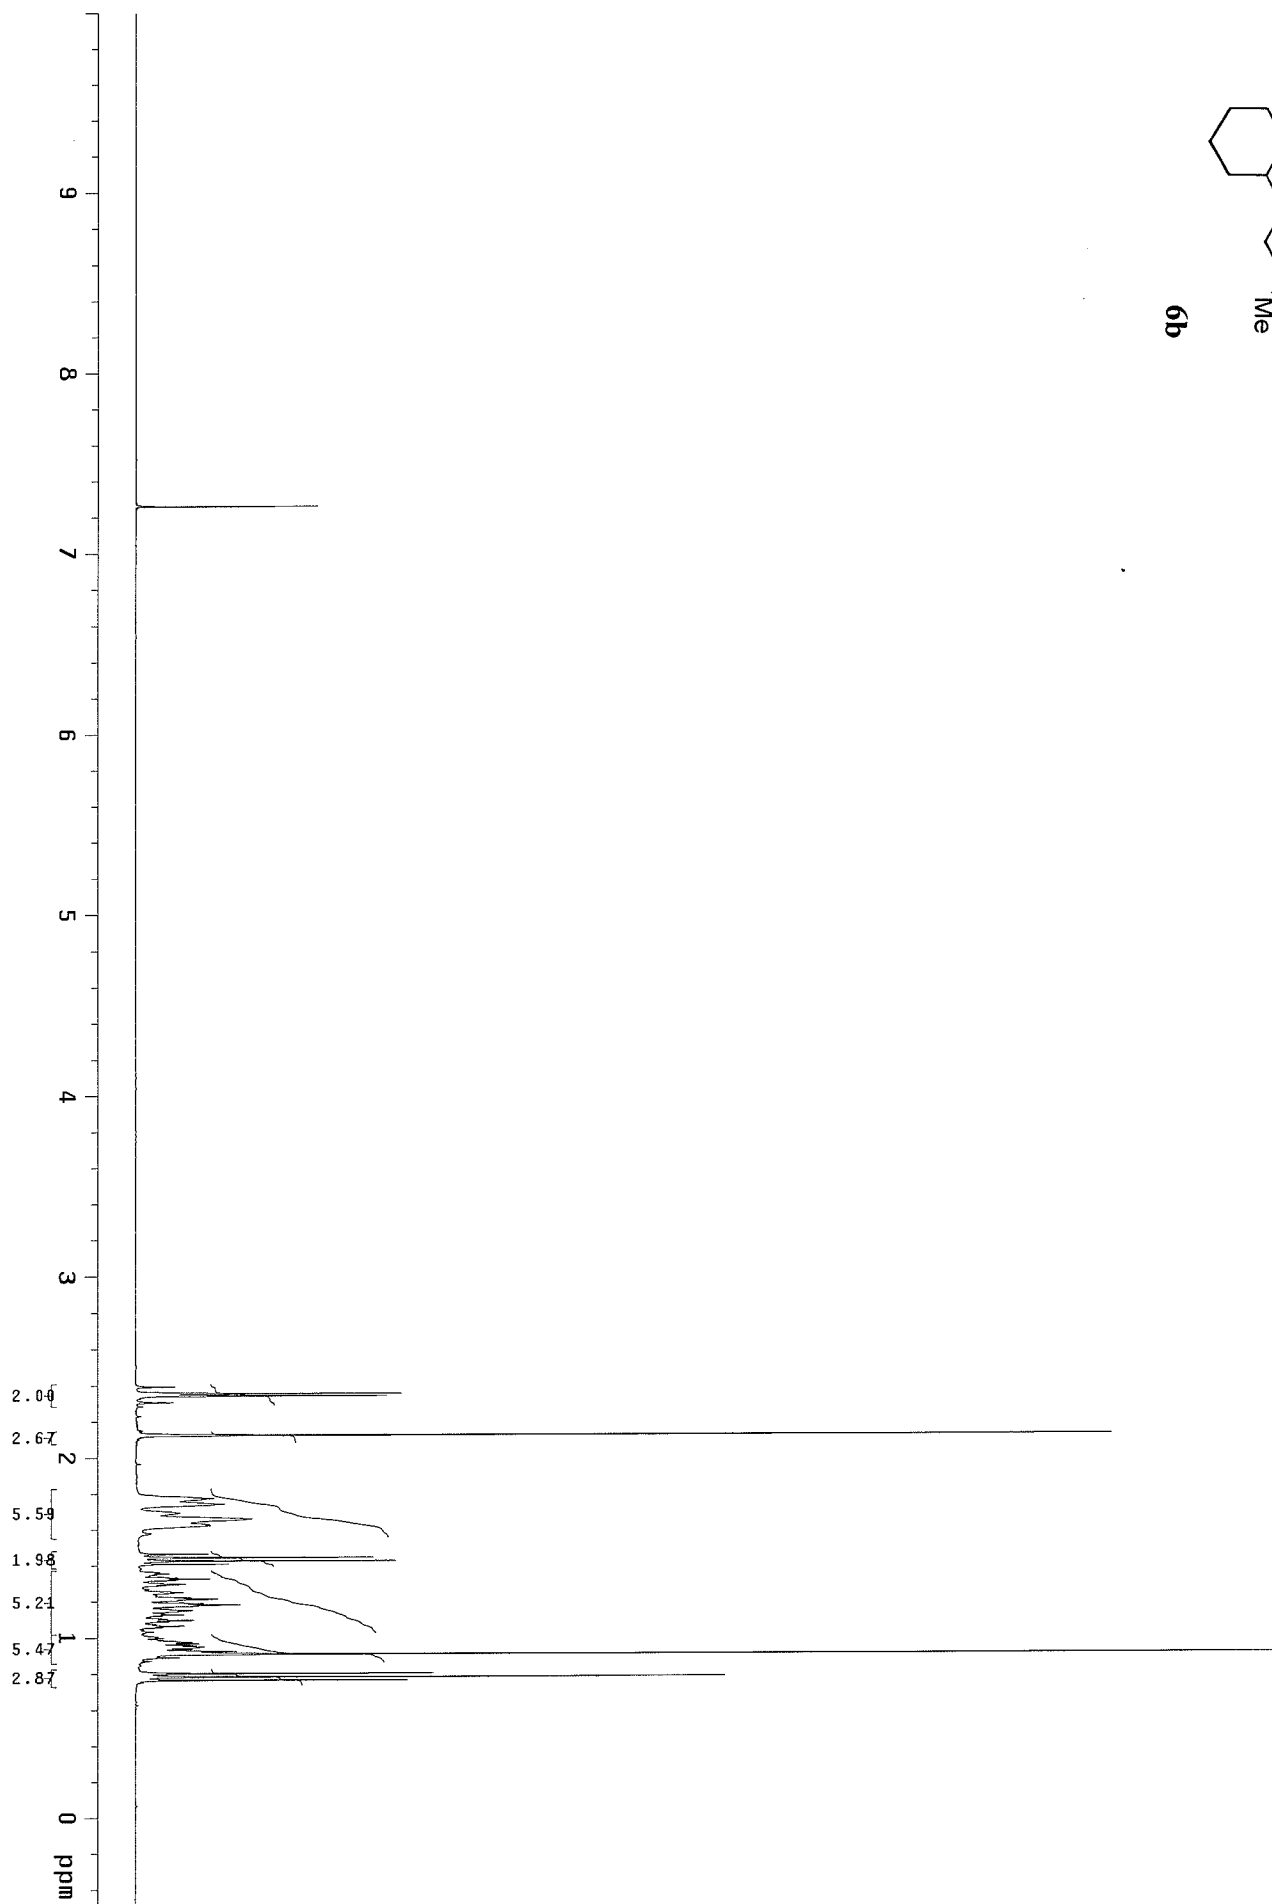

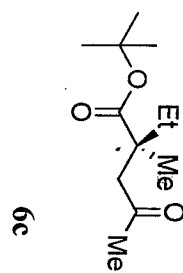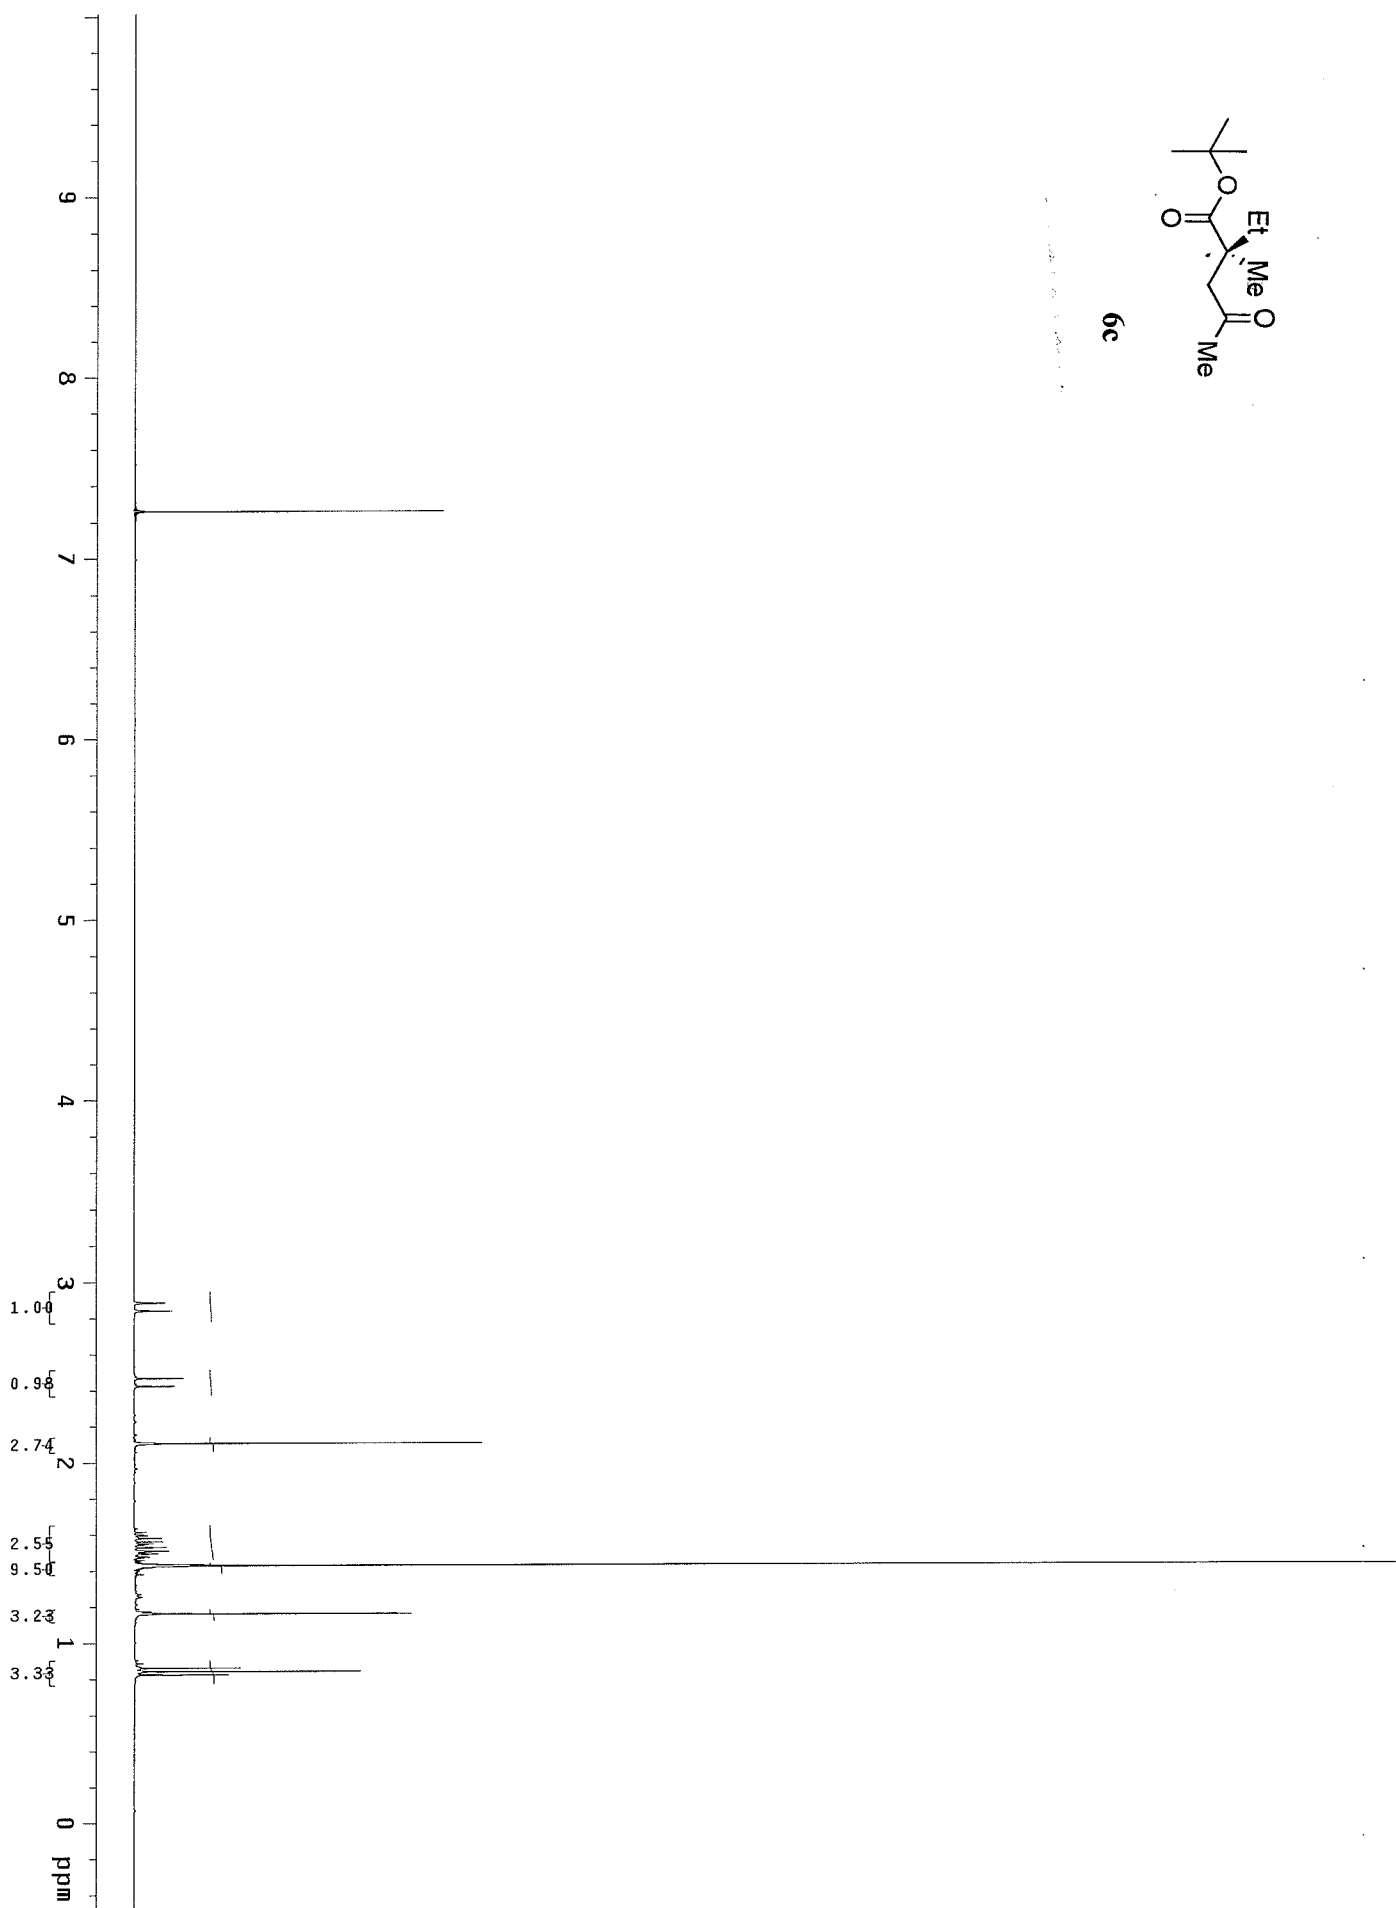

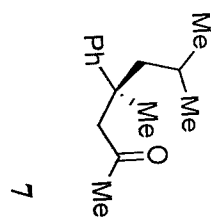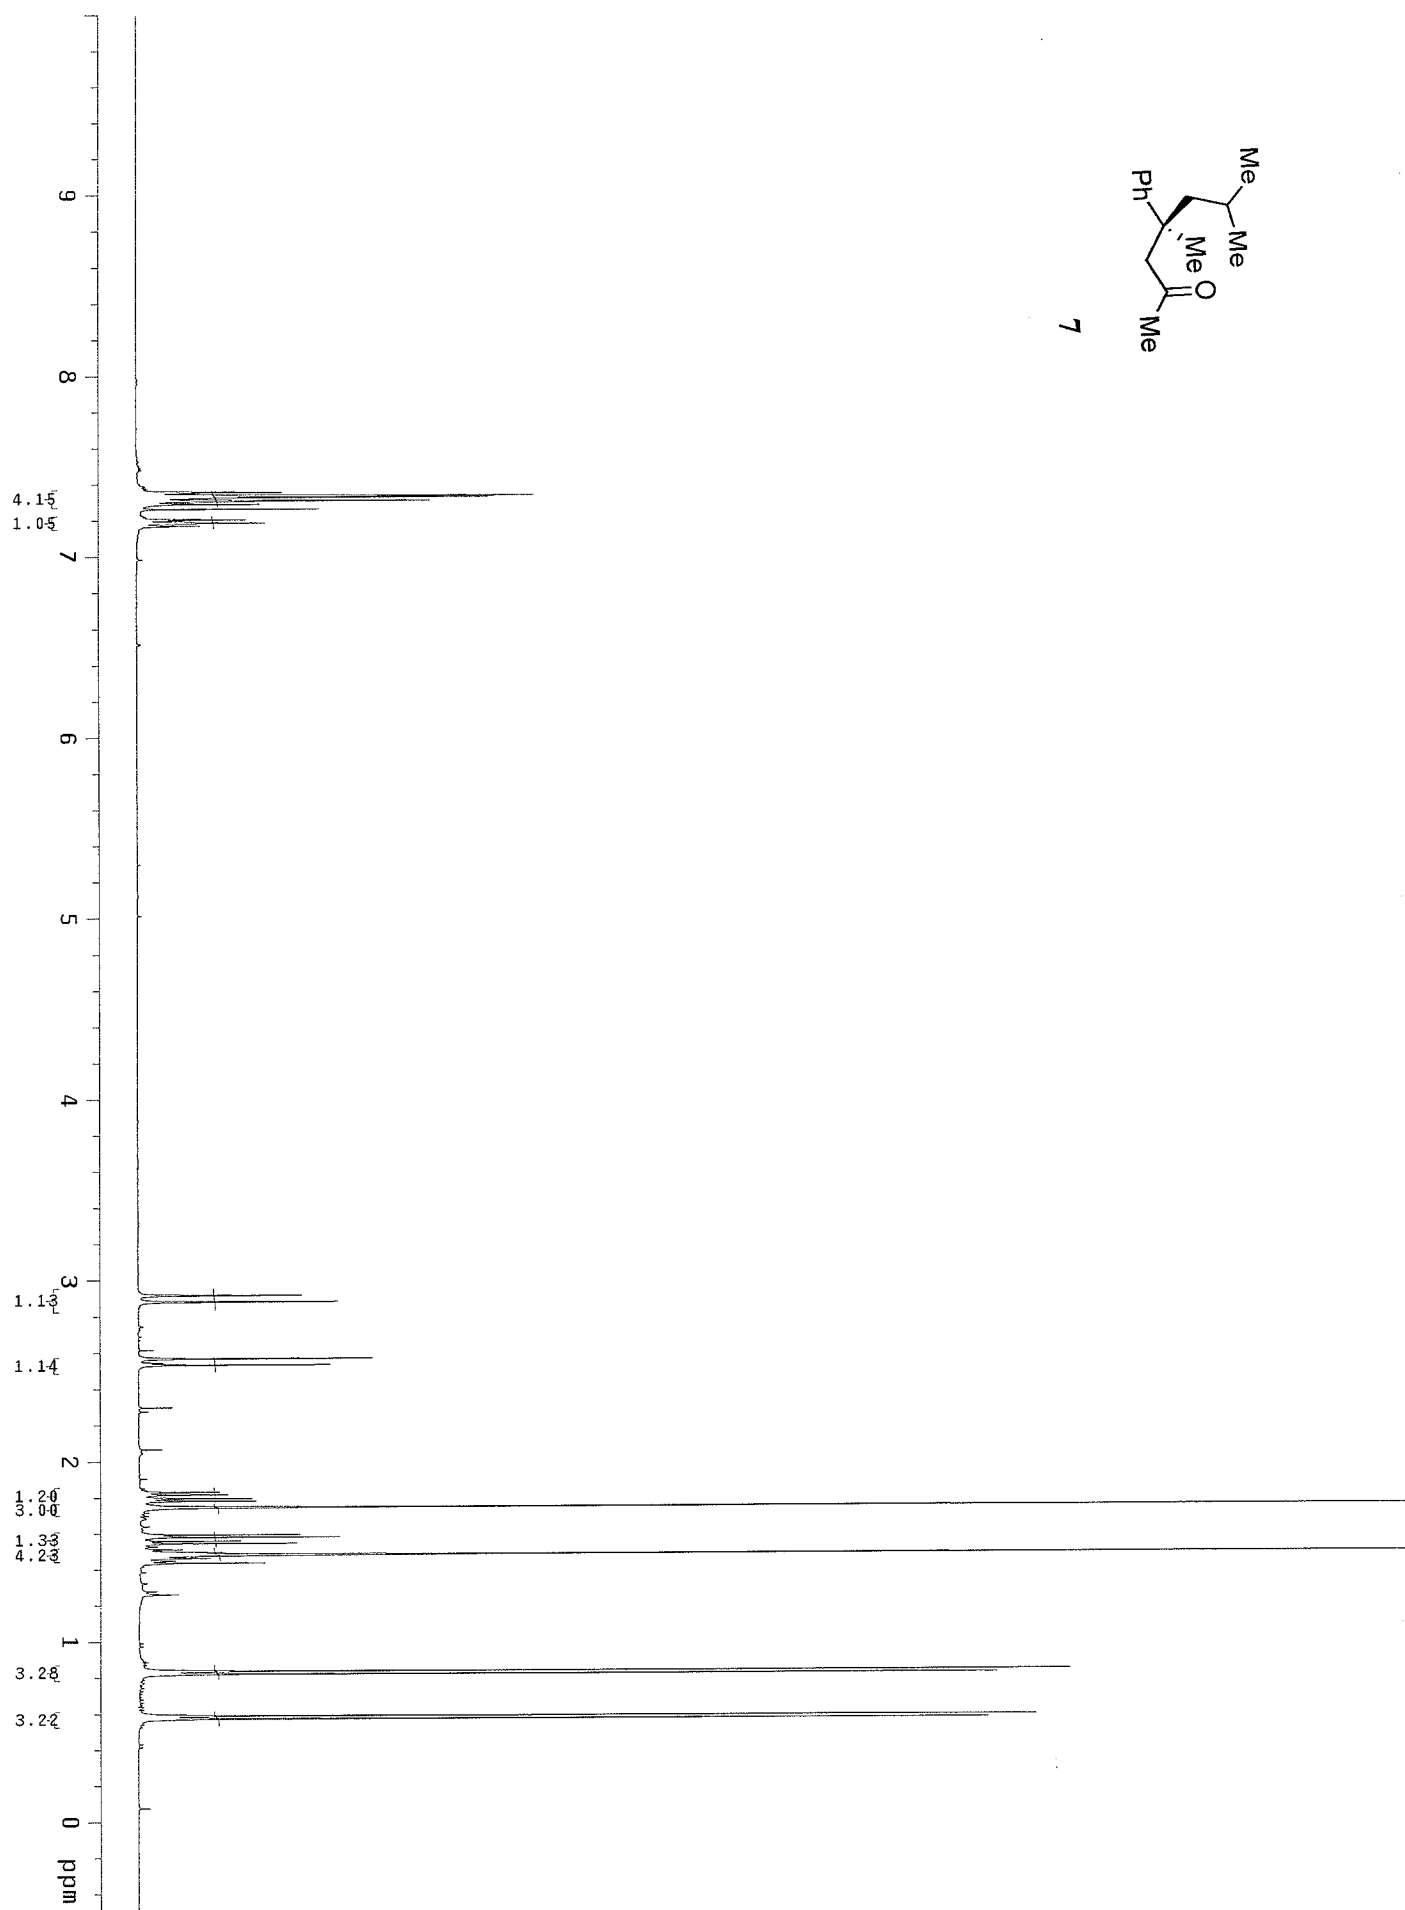

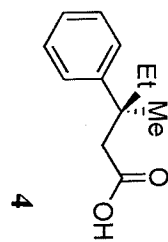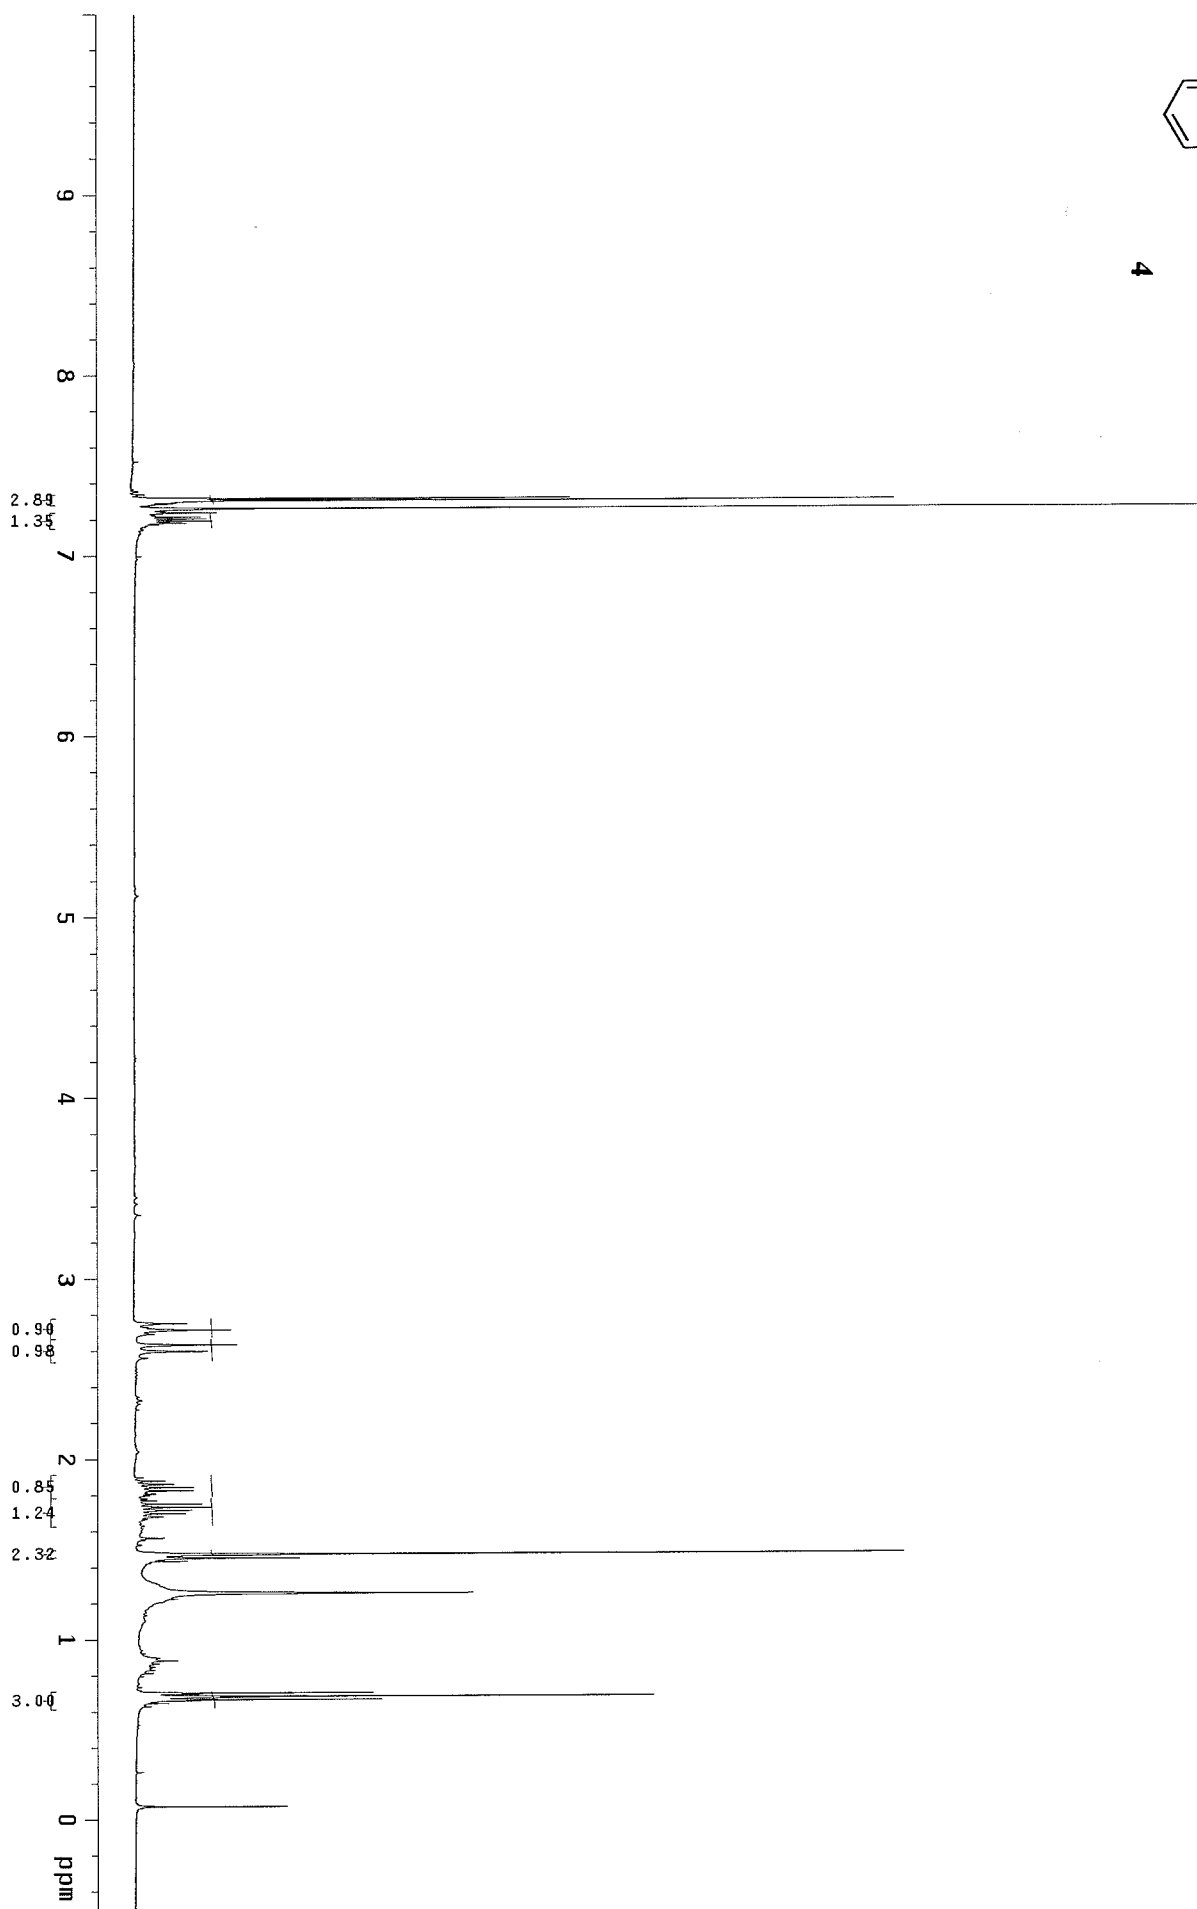



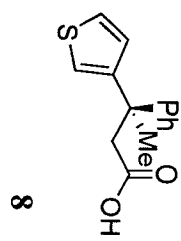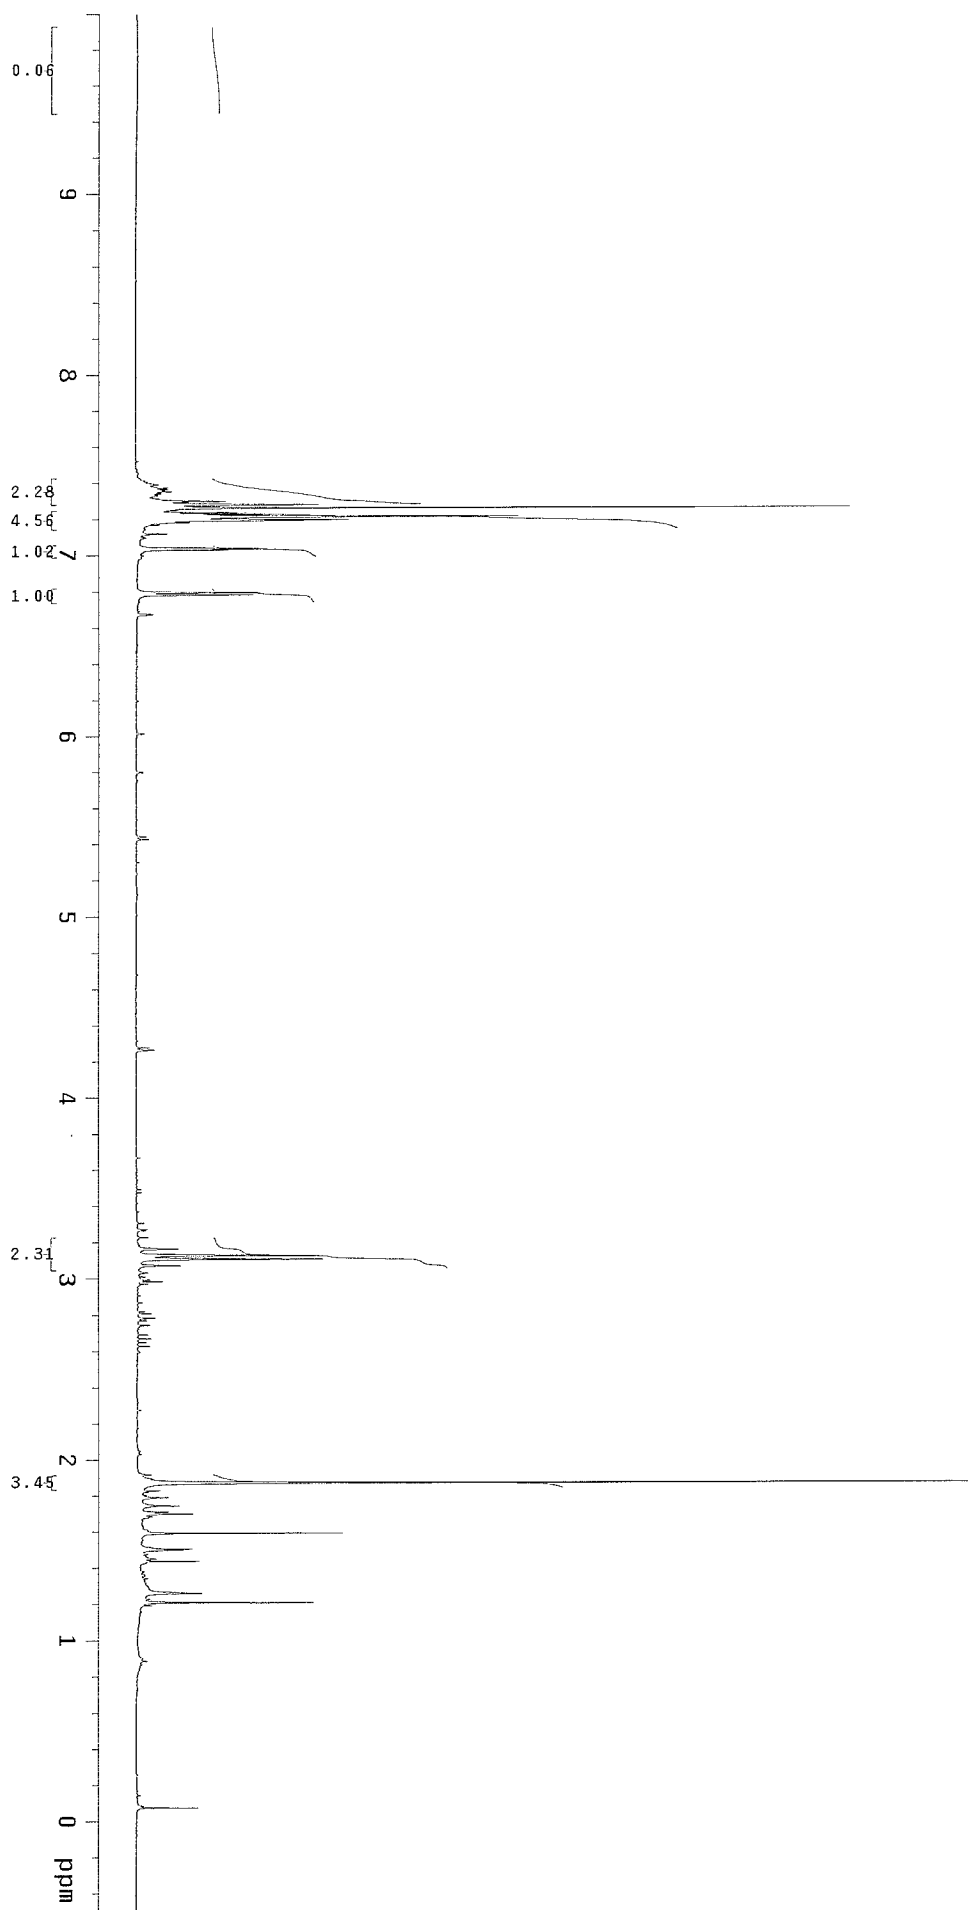

Supplement: NIHMS523174-supplement-Supporting_Information.pdf [file NIHMS523174-supplement-Supporting_Information.pdf]
